# Supplementary material for: The low-copy nuclear gene Agt1 as a novel DNA barcoding marker for Bromeliaceae
Source: Springer Nature journal article supplement (doi:10.1186/s12870-020-2326-5), 2020-03-12
Supplement: MOESM7 [file 12870_2020_2326_MOESM7_ESM.pdf]

5'-UTR

CDS

3'-UTR

***Arabidopsis thaliana* Agt1 (AT2G13360.1) genemodel extracted from PHYTOZOME v12.1**

gcaagctacttgattgggataaactaaataacaaaataaactacttacaaaaacatcatgtaatttaaataaataaaaaataaaaaaaga  
aaaagaagaagatatattaagaggttgaagacgaaggagtcacaaacctccctcaggagctccgcttattcagaggtaaacttctctc  
ttccttgcaaatcttctcgttttctcggctgtttgtgtctatgatctgcctatgaaacatcttttatagtacacataatgtgtctattggaa  
atatgatcggctaacatattgttattgttattaacaaaaaaataacattgttattgttcaccggagttgatagtagcaatagtacatattacatg  
gtcatatatgcatatggctacatgtttgagttatattcgattatctggtgaaagatgagattgtgagttgtaagttttgacagtgtagaggagat  
ccaaaagaaaagaggaaaa**ATGGACTATATGTATGGACCAGGGAGACACCATCTGTTTGTACCAGGACCAGTGAA**  
**CATACCGGAACCGTAATCCGGGCGATGAACCGGAACAACGAGGATTACCGGTCACCAGCCATTCCGGCGCTT**  
**ACGAAAACATTGTTGGAGGATGTTAAGAAGATATTCAAGACCACATCAGGGACACCTTTTCTGTTTCCACGAC**  
**CGGGACTGGTGCTGGGAGAGTGCCTTGACCAACACGTTATCTCCTGGAGACAGGATTGTTTCGTTTCTGATT**  
**GGACAATTTAGCTTGCTCTGGATTGACCAGCAGAAGAGGCTTAATTTCAATGTTGATGTGGTTGAGAGTGATT**  
**GGGGACAAGGTGCTAATCTCCAAGTCTTGGCCTCAAAGCTCTACAAGACGAGAATCATACCATCAAAGCCAT**  
**TTGCATTGTCCACAACGAGACCGCGACCGGAGTTACCAATGACATCTCTGCTGTCCGCACACTCCTCG**gtcattaa  
ttcctcacaataatctgttttctttgtgtttctctgttttaaatctcacttacattagggtttacatacag**ATCACTACAAGCATCCGGCT**  
**TTGCTGCTAGTGGACGGTGTTCGTCCATCTGCGCGCTTGATTCCGAATGGATGAGTGGGGAGTGGACGTGG**  
**CCTTGACTGGGTCTCAGAAAGCCTTATCTTCCAACAGGACTTGGTATTGTCTGCGCCAGTCTAAAGCTTTG**  
**GAAGCTACAAAACCTTCTAAATCTCTCAAAGTATTCTTTGACTGGAATGACTACCTAAGTTTTACAAGCTAGGA**  
**ACCTATTGGCCATACACACCTTCCATTCAACTTCTCTACGGTCTTAGAGCTGCTCTTGATCTTATCTTTGAGGAA**  
**GGACTTGAGAACATCATCGCCGCCATGCTCGTTTGGGAAAGGCCACCAG**gtaaatgaatcatataaaatgaatacactt  
agtctcttcgtaatcttgattcttactagtagcattgacttggaaaacattatagctagagtttgattgttaatgatcatgtacatag**GCTTGCG**  
**GTGGAAGCATGGGGGCTGAAAACTGCACACAGAAGGAGGAATGGATAAGTAACACAGTGACAGCAGTTAT**  
**GGTGCCTCCGCATATAGACGGTTCGGAGATTGTGAGAAGGGCATGGCAGAGGTACAACCTAAGTCTTGGTCTT**  
**GGTCTCAACAAAGTGGCTGGAAAGGTTTTAGAATTGGACACCTAGGAAATGTGAATGAG**gtacatatcgagattta  
tcttagtgaatccaatcttgcacaaactcttcaacaatacaaatcgaacgcag**TGCAACTTCTCGGGTGTCTTGC**GGGA  
**GTGGAGATGATACTGAAGGATGTTGGATACCCAGTTGTAATGGGAAGTGGAGTTGCAGCTGCCTCTACTTATC**  
**TTCAGCACCATTCCTCTCATTCCCTCTAGAATCTAA**ttccatgtggctctctcttctctctctcaatgtaaacaactctc  
atgttttctctttctcatctatattttactacattatctatgttttatttgcctatccaacaaactattgaaacaaaagatcaaatatgtttact  
cactataaactttgtctcaacaactcaacttatatgggtatgaggatgctcttacaatgtagtgaacataactcgagtcaaaaactatgtttgg  
gatgaggatactgatcgtaagtgaaaaagataatttgcctctcatccatttatatggaggttggttaaagacactatagtcgggagaagg  
tgtccatttcgcggtatgaagtcgaagacgactgagatataaggctacatttggcggtatgaagtcgaagacgactgagatataaggctaca  
tttcgcggtatgaagtcgaagacgactgagatataaggctacatttggcggtatgaatcaagaagactatttcaaggggtcttatctgtgac  
aacaaaaggaactctgtgatgcttcttatgcctagtcagtaatcacaatgttctgcataacaacctccatattaataagaaatattgaaattc  
tttaaaatgtatttgcgcttaacgcttttagtttaaac

***Ananas comosus* Agt1 (Aco003139) genemodel extracted from PHYTOZOME v12.1**

>Aco003139 | LG06:14066281..14071086 reverse

**GGAGCAACGTTTCAAAGCAATACTACTGGACCCAGGAACCAACCAATAG**GTA**CTCTCTCTCTCTCTCTCTCTCT**  
ATAGAATTATAGTATCTGATTCTACATATATTGCTAGGAAAGTAGTGCATGCGATTTATGGAATTTGTTACGCA

AATTACTTGCTTTGTATTTAGCATACAAGCTATATTATGTTTGAAGGAGATGATCGTATGTTTCTTTTTGCATGTT  
TTACTTCCGTAAGCATACATATGAAGCATCTCAAAAATAGACCACACATGTACACAAAAAATAAACTACGC  
TTCGTCTAATTATTTAGAAATGAACTCAAGTGAATATATAAAATTAATAAATTTTTCGAACTAATTAATCGAATATT  
TAGTCAACTACTCTAAATACCATTGGTCACCCATGATAAAAGTGTTAATGTGAGATACTTAATTGAGCCTTTTAG  
ATTAATCAGGTCCTCTTTCATCAAATTTTTTTTTAAAAAAATTACAGAACTGCTAAAAGTAAGTGAGAGAATT  
TCATAATTTGTTACTCGCACCAAAGTTTCAAACGTAGCAAGCGTACAGGGTGTGTAAAAGAAGTAAATGATTTA  
AAACATGCGGCTTATAGAACATTAACAAGTCATTCTTCTTAATTTATACACACACACACACTCTAAACAAA  
AAAAAATAAATTTTAAAAGTTCATCCTTATAGC  
AAGAGATACAGGATATACCAAGGACGTTATTTTTAGGCACTAGCTTTCCACGAGTAAGAACTTCTTTTTATTA  
GATAAATTTTAAACGGCTGAATATATCCGTGCATAAGATTTTTCTGAAATAACTTCTAAGCTTCATTTAGCAGC  
TTCTGTAGTTCTGTTGTTCTAAATTTTTTTTTTAAATGTTGTTTTTTTTTGGAGACCCTGGTTGTCTCACTTCTGT  
AGCCTAGTTTATACATTCAATCAATGAAGTAGGTAGTAAGCTATCTTTTCTCAAAAAAACTCATCTAAGCTAA  
CAACCAATTATTTTTTAAATAGTAGTTTGATAAATACAGTTGCCTCCAAATTGCACTTGATTTTCAATTTTTCGAAGA  
TCGTATCACAGCGACTCATTGTAATAAAAAAAAAAAAAAAAAACACGTGGCGGCCATGACGCATCCGTCTCTT  
TCCACTTTGCGTATAAGAGTACCTCACAAACGAAGGAAAAAAGAGAGAGAGAGAGAGAGAGAGAGAGAGAGAGAGAG  
GAGTGAGAGAAAAAAGTCTCTTTTTTCTTCGGTACGAATGGAACGCTGGCCTTTTCCGTCTTACCCC  
CATTAAATATTAGAAATTACACGCATCACTTACGCGCTTAAAGCCACTCAATTGGTTCCATTTCCATTTAATATCT  
ATCTGGGGAAAAAATAAATAAATAAATAAATAAATAAATAAATAAATAAATAAATAAATAAATAAATAAATAAATAA  
TAAAAGCAAGCAGGGTGTATTTTCTCACAG**GTTAAGTTAAAAAATAAATAAATAAATAAATAAATAAATAAATAAATAA**  
**GAAGAAGAAGAAGATGGATTATGTGTATGGACCTGGGAGAAACCACCTGTTCTGTGCCGGGGCCGGTGAACAT**  
**CCCCGAGCCGGTGATTCTGGGCGATGAACCGCAATAACGAGGACTACCGATCTCCCGCCGTGCCCGCTCTGACA**  
**AAGACGCTTCTCGAAGACGTCAAGAAGATCTTCAAGACAACATCCGCAACCCCTTCGTAATCCCACCACCGG**  
TACTTCCATCCATCCACNCAAAAAAATAAATAAATAAATAAATAAATAAATAAATAAATAAATAAATAAATAAATAA  
TAAATACAGTTGCCTCCAAATTGCACTTGATTTTCAATTTTTCGAAGATCGTCATCACAGCGACTCATTGTAAAAA  
ACAAAAAATAAATAAATAAATAAATAAATAAATAAATAAATAAATAAATAAATAAATAAATAAATAAATAAATAA  
ACAAAGGAAAAAAGAGAGAGAGAGAGAGAGAGAGAGAGAGAGAGAGAGAGAGAGAGAGAGAGAGAGAGAGAGAG  
AATGGAACGCTGGCCTTTTCCGTCTTACCCCCATTAAATATTAGAAATTACACGTATCCGTACGCGCTTAAAGCC  
ACTCAATTGGTTCCATTTCCATTTAATATCTATCTGGGGAAAAAATAAATAAATAAATAAATAAATAAATAAATAA  
CATGTTTCAAAGTAGTATTTTCCGGGGCCCTAAAAGCAAGCAGGGTGTATTTTCTCACAGGTTAAGTTAAAAA  
AAAAAATAAATAAATAAATAAATAAATAAATAAATAAATAAATAAATAAATAAATAAATAAATAAATAAATAA  
AAAAAATAAATAAATAAATAAATAAATAAATAAATAAATAAATAAATAAATAAATAAATAAATAAATAAATAA  
GAAGAAGAAGAAGATGGATTATGTGTATGGACCTGGGAGAAACCA  
**CCTGTTCTGTGCCGGGGCCGGTGAACATCCCCGAGCCGGTGATTCTGGGCGATGAACCGCAATAACGAGGACTA**  
**CCGATCTCCCGCCGTGCCCGCTCTGACAAAGACGCTTCTCGAAGACGTCAAGAAGATCTTCAAGACAACATCCG**  
**CAACCCCTTCGTAATCCCACCACCGGTA**CTTGCATCCATCCATCCATCCATCCACTCCAGTTACATCGGATCTT  
GTGACAAGTCCAATATATAGTTCGTACACGCTTTTTGCACCTTAATTGTTTGTAACTATTTTTGTGTCCTGGAT  
TAGGCACCGGAGCATGGGAAAGTGCCTGACGAACACTCTATCACCTGGGGACAGAATCGTGTCTTTCTGAT  
**CGGCCAATTAGCCTCCTCTGGATCGACCAGCAGCAGCGCTCAAGTTCGACGTGGACGTCGTGAAAGCGAG**  
**TGGGGCCGCGGCCAATCTCGACGTCCTGGAATCTAACTGGCGGCCGACAGGAGTACACCATCAAGGCT**  
**ATCTGCATTGTTACAACGAGACGGCCACCGCGTCACCAACAATTTGCCGGCTGTGAGGAACTGCTCG**GTA  
AGCGCAACAATCGGAAAAAGCTTGGGGAGATGATTTTGTGTGCTTGTGTTCTGTCTATATAATTTACAGCAG  
TCGATAAGATGGTTTCGTAGAAAAATTATGCTTTTAAAGCCTTCGATCCTACGCATCCAATTAATAGGTAGATG  
AATTCTCTGTTACTTGTATATACTGTTATATTGGCATCAGATCAGGCATGGACTCTGTAATGCACCTATACATTG  
TTTCAGCAGTAACGAAGGCTTAATTAGATGGTCGTAATATAGAAATAAGGTAGATGAATTATAGTCATCTTTAT  
ATGCCTCTTCTTGTATTCTAACATATTAAGTACTTAATACGGCAG**ACGATTACAGCCATCCCGCACTAATACTT**  
**GTTGATGGCGTGTGTCGATATGTGCTTCTGACTCCGAATGGACGAATGGGGGATTGATGTCGCTTAACCG**  
**GCTCGCAGAAAGCTCTTTCGATGCCTACTGGAATGGCATTCTTTGTGCGAGCCCGAAAGCTCTAGAAGCTT**  
**CCAAAACAGCCAAGTCGGTCAGGGTTTTCTTCTGACTGGAATGACTACTTGAAGTCTACAAGCTCGGAATT**

ACTGGCCTTACACGCCTTCCATCCAACACTACTTTACGGGCTAAGAGCAGCTTGGATCTCATCTTTGAGGAGGG  
GCTCGACAATGTCATCGAAAGGCATCGTCGCTTAGGAAAGGCCACAAGGTAACCTAAGCACACAATCTTCTAT  
CGAGTACTGCTGTAAAAGCTGGATTTTCATATATACATCTACTACTGAATAGCCGCTTTTTCGCCGCACTGTTG  
GAATATGTTATAGATGGATATTACTTGGCACCGATTATTTTACGACCTCTTGTAAACATAATCGGGCGTAAAATG  
ACCTTGCAAGACTTGCTGTGAAGCTTGGGACTGAAGAATTGCACGCAGAAAGAGGAATGGTTCAGCGACA  
CGGTCACTGCAGTTCTGGTGCCGCCTTACATTGATAGCGCTGAAATTGTGAGGAGGGCGTGGAAGAGATACA  
ATCTAAGCTTGGGTTTGGGCCTCAACAAAGTGGCCGAAAAGTGTTCCAGGATAGGGCATCTCGGCAACCTCAA  
TGAGGTATATTACAATTCTTGTTCATTTTCCGGGTTTTTCGACTTTCAAAAAAGAGAAGAAGATAAATAGAGAT  
TATTTGCGTGCGGCCGACGGCCAGAACCTCTGTAAAACACCGTATTGTGCTGCTTCGCACAAAGGTGCCTC  
TTAAAAAATAGGACCTCAATGCTTGCTTAACTGTTAACTGTTTTGTTAGTAAAACCTCGATTGATACCGTCCAA  
CGTCAAAGCTTTCTGTTTTTACACAGCTTATTTATGAATGAGCCAGATTTTGCAAGGCTACATGTAATGGAAC  
AAAATTTTTCCAGCTTCTGCGCGCAAGTACTTGGCTAATAACAATGTAGAATCTTATGCATAATTTCAAGTATA  
TAAGACTGATTTTTATCTATATTTTTCTGCAGTTGCAATTGCTGGGTTGCTTAAGTGGAGTAGAGATGGTGCTG  
AAGGATGTGGGCTACCCAGTGAAGCTGGGGAGTGGAGTAGCTGCTGCAGCTGCTTATCTTCAGAACACTATCC  
CTCTCATCCCCTCTCGAATCTGAGTTTTCTATAATTGCCTCCTTTGCTTCAAATCCTTGAATTAAGGAAAAAAAA  
AAATACTGTAATCTCATTAGGAGGCTGAGGCCCTGATAAATACTGTACTACTGTATCTAAATCTTTTACATT  
GAATATGGTAGTAGTTAAGCCCTTCAAAAAAAGCTTGTCAAGTTAAAATGTTAGATTTACTCAAATCAAG
