# Supplementary material for: The low-copy nuclear gene Agt1 as a novel DNA barcoding marker for Bromeliaceae
Source: BMC Plant Biol. 2020 Mar 12;20:111. doi: 10.1186/s12870-020-2326-5 (PMC7068990; doi:10.1186/s12870-020-2326-5)
Supplement: Supplementary file 1 — Additional file 1. Supplementary_Table_S1_Plant_Material. [file 12870_2020_2326_MOESM1_ESM.xlsx]

## Sheet: CD_Hit_Bromelioideae
Cluster #	Sample/Taxon	% identity	Monophyletic	(Monophyletic) Group/Genus	Literature support
>Cluster 0				Portea/Gravisia Group	Heller et al., 2015
0	BB113_Aechmea_chrysocoma	98.87%	YES		Heller, 2018
1	BE052_Aechmea_bahiana	99.11%	YES
2	BE058_Aechmea_costantinii	98.43%	YES
3	BE064_Aechmea_rubrolilacina	99.55%	YES
4	BE068_Aechmea_sucreana	99.33%	YES
5	BE070_Canistrum_aurantiacum	98.88%	YES
6	BE073_Canistrum_alagoanum	99.10%	YES
7	BE082_Aechmea_cephaloides	99.09%	YES
8	BE088_Portea_filifera	99.11%	YES
9	BE090_Aechmea_guainumbiorum	98.42%	YES
10	BE091_Aechmea_discordiae	99.33%	YES
11	BE092_Portea_nana	98.88%	YES
12	BE096_Portea_silveirae	99.33%	YES
13	BE101_Aechmea_aquilega	98.65%	YES
14	BE127_Aechmea_marauensis	98.44%	YES
15	BE141_Aechmea_guaratinguensis	99.33%	YES
16	BE176_Aechmea_eurycorymbus	99.10%	YES
17	BE182_Portea_kermesina	99.32%	YES
18	BE184_Portea_grandiflora		YES
19	BE243_Aechmea_leptantha	98.42%	YES
20	BE249_Aechmea_amicorum	99.11%	YES
21	BE391_Aechmea_marauensis	99.33%	YES
22	BE393_Aechmea_blanchetiana	98.87%	YES
23	BE413_Portea_filifera	99.11%	YES
24	BE419_Portea_fosteriana	99.33%	YES
25	BE481_Canistrum_aurantiacum	98.84%	YES
>Cluster 1				Wittmackia + Ronnbergia Group	Aguirre-Santoro, 2017
0	BE156_Wittmackia_lingulata	98.57%	YES		Heller, 2018
1	BE158_Wittmackia_patentissima		YES
2	BE250_Wittmackia_sulbahianensis	98.98%	YES
3	BE331_Wittmackia_froesii	99.59%	YES
4	BE386_Wittmackia_incompta	99.39%	YES
5	BE392_Wittmackia_amorimii	98.37%	YES
6	BE398_Wittmackia_pernambucentris_	98.57%	YES
7	BE401_Wittmackia_turbinocalyx	99.59%	YES
8	BE408_Ronnbergia_fraseri	98.57%	YES
9	BE415_Wittmackia_lingulatoides	98.78%	YES
10	BE453_Wittmackia_lingulata	98.98%	YES
11	BE521_Wittmackia_tentaculifera	98.57%	YES
12	BE548_Wittmackia_ituberaensis	98.98%	YES
>Cluster 2				Hohenbergia subgen. Hohenbergia + Canistrum subgen. Canistrum + Aechmea southern	Heller et al., 2015
0	BB056_Hohenbergia_catingae	98.65%	YES	Bahia complex group	Heller, 2018
1	BE062_Canistrum_improcerum	98.65%	YES
2	BE076_Canistrum_sandrae	99.10%	YES
3	BE081_Canistrum_guzmanioides	98.65%	YES
4	BE186_Aechmea_echinata	98.43%	YES
5	BE196_Aechmea_paradoxa		YES
6	BE235_Hohenbergia_conquistensis	99.33%	YES
7	BE247_Aechmea_entringeri	98.20%	YES
8	BE358_Hohenbergia_stellata	98.66%	YES
9	BE382_Hohenbergia_belemii	98.43%	YES
>Cluster 3				Nidularioid group	Santos-Silva et al., 2017
0	BE103_Wittrockia_superba	98.39%	YES		Heller, 2018
1	BE106_Neoregelia_concentrica	98.80%	YES
2	BE115_Nidularium_purpureum	98.39%	YES
3	BE118_Nidularium_fulgens	98.39%	YES
4	BE302_Canistropsis_correia-araujoi		YES
5	BE360_Edmundoa_lindenii	98.40%	YES
6	BE463_Neoregelia_lactea	98.19%	YES
7	BE583_Neoregelia_pascoaliana	98.60%	YES
8	BE624_Neoregelia_lymaniana	98.19%	YES
>Cluster 4				Nidularioid group	Santos-Silva et al., 2017
0	BB125_Edmundoa_perplexa		YES		Heller, 2018
1	BE133_Neoregelia_nivea	98.39%	YES
2	BE136_Edmundoa_lindenii	98.60%	YES
3	BE144_Neoregelia_bragarum	98.40%	YES
4	BE180_Canistropsis_billbergioides	98.40%	YES
5	BE458_Nidularium_innocentii	99.00%	YES
6	BE482_Edmundoa_ambigua	99.40%	YES
7	BE489_Eduandrea_selloana	99.00%	YES
>Cluster 5				Hohenbergia subgen. Hohenbergia + Canistrum subgen. Canistrum + Aechmea southern	Heller et al., 2015
0	BE034_Aechmea_floribunda		YES	Bahia complex group	Heller, 2018
1	BE047_Aechmea_ramosa	98.21%	YES
2	BE240_Aechmea_araneosa	99.10%	YES
3	BE319_Hohenbergia_augusta	98.66%	YES
4	BE505_Aechmea_weberi	98.43%	YES
5	BE523_Hohenbergia_burle-marxii	98.88%	YES
6	BE556_Hohenbergia_humilis	98.21%	YES
7	BE611_Canistrum_lanigerum	98.85%	YES
>Cluster 6				Nidularioid group	Santos-Silva et al., 2017
0	BE102_Nidularium_amazonicum	98.01%	YES		Heller, 2018
1	BE109_Canistropsis_exigua	98.40%	YES
2	BE134_Neoregelia_compacta	98.19%	YES
3	BE175_Wittrockia_gigantea	98.39%	YES
4	BE194_Neoregelia_nevaresii	98.19%	YES
5	BE459_Nidularium_campoalegrense	99.40%	YES
6	BE607_Nidularium_innocentii		YES
>Cluster 7				Central American Clade (core Bromelioids)	Sass and Specht, 2010
0	BE040_Aechmea_lueddemanniana_		YES		Heller, 2018
1	BE344_Aechmea_marginalis	98.99%	Unknown
2	BE445_Ursulaea_macvaughii	98.79%	YES
3	BE455_Ursulaea_tuitensis	99.39%	YES
4	BE460_Aechmea_mariae-reginae	98.99%	YES
5	BE461_Aechmea_mexicana	100.00%	YES
6	BE606_Androlepis_fragrans	99.19%	YES
>Cluster 8				Cryptanthoid complex	Leme et al., 2017
0	BE641_Hoplocryptanthus_caracensis		YES		Heller, 2018
1	BE650_Lapanthus_vidaliorum	98.98%	Unknown
2	BE651_Hoplocryptanthus_schwackeanus	98.78%	YES
3	BE652_Cryptanthus_glazioui	99.19%	Unknown
4	BE664_Hoplocryptanthus_tiradentesensis	99.30%	YES
5	BE669_Hoplocryptanthus_lavrasensis	98.35%	YES
6	BE685_Lapanthus_vidaliorum	98.95%	Unknown
>Cluster 9				Billbergia	Evans et al., 2015
0	BE234_Billbergia_distachia	98.68%	YES		Heller, 2018
1	BE376_Billbergia_nana		YES
2	BE377_Billbergia_elegans	99.34%	YES
3	BE429_Billbergia_elegans	99.12%	YES
4	BE584_Billbergia_horrida	98.90%	YES
5	BE613_Billbergia_vittata	98.78%	YES
>Cluster 10				Cucullatanthus group	Heller et al., 2015
0	BB107_Aechmea_atrovittata	98.87%	YES		Heller, 2018
1	BE056_Aechmea_disjuncta	98.87%	YES
2	BE077_Canistrum_fosterianum	98.87%	YES
3	BE086_Canistrum_seidelianum	99.23%	YES
4	BE087_Aechmea_gurkeniana		YES
5	BE511_Aechmea_disjuncta	98.20%	YES
>Cluster 11				Cryptanthoid complex	Leme et al., 2017
0	BE491_Cryptanthus_diamantinensis		YES
1	BE493_Cryptanthus_colnagoi	99.02%	YES
2	BE634_Cryptanthus_maritimus	99.61%	YES
3	BE661_Cryptanthus_dianae	99.20%	YES
4	BE665_Cryptanthus_burle-marxii	99.57%	YES
>Cluster 12				Amazonian Aechmea groups	Heller, 2018
0	BE044_Aechmea_tessmannii	98.78%	YES
1	BE402_Aechmea_roeseliae		YES
2	BE444_Aechmea_moorei	98.78%	YES
3	BE474_Aechmea_contracta	98.78%	YES
4	BE502_Aechmea_cucullata	99.19%	YES
>Cluster 13				Ananas	Matuszak-Renger et al., 2018
0	BE178_Ananas_fritzmuelleri		YES
1	BE210_Ananas_ananassioides	98.99%	YES
2	BE495_Ananas_comosus	99.19%	YES
3	BE500_Ananas_ananassioides	99.19%	YES
4	BE501_Ananas_ananassioides	98.99%	YES
>Cluster 14				Cryptanthoid complex (Rokautskya)	Leme et al., 2017
0	BE638_Rokautskyia_microglazioui	98.14%	YES
1	BE654_Rokautskyia_odoratissima		YES
2	BE659_Rokautskyia_exaltata	98.34%	YES
3	BE660_Rokautskyia_fernseeoides_	98.21%	YES
4	BE667_Rokautskyia_sanctaluciae	98.06%	YES
>Cluster 15				Same Species
0	BRC393_Aechmea_nudicaulis	99.41%	YES
1	BRC412_Aechmea_nudicaulis	99.32%	YES
2	BRC428_Aechmea_nudicaulis		YES
3	BRC429_Aechmea_nudicaulis	99.60%	YES
>Cluster 16				Araeococcus	Schulte et al., 2009
0	BE257_Araeococcus_chlorocarpus		YES		Silvestro et al., 2014
1	BE293_Araeococcus_sessiliflorus	99.34%	YES
2	BE384_Aechmea_mutica	98.21%	NO
3	BE645_Araeococcus_parviflorus	99.34%	YES
>Cluster 17				Hohenbergia	Heller et al., 2015
0	BE222_Hohenbergia_edmundoi	98.65%	YES		Heller, 2018
1	BE229_Hohenbergia_loredanoana		YES
2	BE233_Hohenbergia_stellata	98.65%	YES
3	BE564_Hohenbergia_rosea	98.65%	YES
>Cluster 18				No Support
0	BE168_Aechmea_phanerophlebia		NO
1	BE342_Aechmea_aiuruocensis	98.99%	NO
2	BE374_Aechmea_phanerophlebia	98.81%	NO
>Cluster 19				No Support
0	BE174_Aechmea_nudicaulis		NO
1	BE279_Aechmea_nudicaulis	98.81%	NO
2	BE533_Quesnelia_kautskyi	98.39%	NO
>Cluster 20				No Support
0	BE154_Aechmea_mira		NO
1	BE155_Aechmea_alopecurus	99.00%	NO
2	BE503_Aechmea_sphaerocephala	98.39%	NO
>Cluster 21				Nidularioid group	Santos-Silva et al., 2017
0	BE183_Canistropsis_marceloi		YES		Heller, 2018
1	BE563_Neoregelia_retrorsa	98.19%	YES
2	BE616_Neoregelia_viridovinosa	98.39%	YES
>Cluster 22				No Support
0	BE403_Aechmea_egleriana		NO
1	BE497_Aechmea_rodriguesiana_	99.39%	NO
2	BE552_Aechmea_polyantha	98.98%	NO
>Cluster 23				Amazonian Aechmea groups	Heller, 2018
0	BE041_Aechmea_chantinii	98.93%	YES
1	BE437_Aechmea_angustifolia		YES
2	BE547_Aechmea_tillandsioides	98.49%	YES
>Cluster 24				Orthophytum	Leme et al., 2017
0	BE492_Orthophytum_vagans	99.15%	YES
1	BE644_Orthophytum_zanonii		YES
2	BE680_Orthophytum_pseudovagans	98.63%	YES
>Cluster 25				Same Species
0	BE475_Quesnelia__edmundoi_var_edmundoi		YES
1	BE622_Quesnelia_edmundoi_var_edmundoi	99.12%	YES
2	BE630_Quesnelia_edmundoi_var_rubrobracteata	99.12%	YES
>Cluster 26				Lymania	de Sousa et al., 2007
0	BE218_Lymania_smithii		YES
1	BE320_Lymania_globosa	99.11%	YES
2	BE628_Lymania_languida	98.89%	YES
>Cluster 27				No Support
0	BE112_Quesnelia_koltesii	98.65%	Unknown
1	BE198_Aechmea_racinae		Unknown
2	BE292_Quesnelia_clavata	98.65%	Unknown
>Cluster 28				Same Species
0	BE540_Aechmea_weilbachii_var_albipetala		YES
1	BE542_Aechmea_weilbachii_var_weilbachii_forma_viridisepala	98.88%	YES
2	BE545_Aechmea_weilbachii_var_weilbachii_forma_pendula	98.44%	YES
>Cluster 29				Aechmea subgen. Ortgiesia	Heller, 2018
0	BE610_Aechmea_candida		YES
1	BE614_Aechmea_coelestis	99.61%	YES
>Cluster 30				Aechmea subgen. Ortgiesia	Heller, 2018
0	BE039_Aechmea_cylindrata	99.50%	YES
1	BE448_Aechmea_gracilis		YES
>Cluster 31				Cryptanthoid complex (Lapanthus)	Leme et al., 2017
0	BE632_Lapanthus_duartei		YES
1	BE633_Lapanthus_itambensis	99.01%	YES
>Cluster 32				Same Species
0	BE231_Ronnbergia_silvana		YES
1	BE636_Ronnbergia_silvana	99.60%	YES
>Cluster 33				Same Species
0	BE434_Aechmea_allenii		YES
1	BE435_Aechmea_allenii	99.40%	YES
>Cluster 34				Aechmea subgen. Aechmea	Heller, 2018
0	BE167_Aechmea_fasciata	98.79%	YES
1	BE318_Aechmea_flavorosea		YES
>Cluster 35				Nidularioid group	Santos-Silva et al., 2017
0	BE488_Neoregelia_pineliana		YES		Heller, 2018
1	BE578_Neoregelia_tenebrosa	98.80%	YES
>Cluster 36				No Support
0	BE071_Quesnelia_liboniana	98.19%	NO
1	BE400_Aechmea_triticina		NO
>Cluster 37				Same Species
0	BE683_Orthophytum_roseolilacinum		YES
1	BE693_Orthophytum_roseolilacinum	99.39%	YES
>Cluster 38				Same Species
0	BE449_Aechmea_hoppii		YES
1	BE531_Aechmea_hoppii	98.59%	YES
>Cluster 39				Aechmea subgen. Chevaliera	Aguirre-Santoro et al., 2016
0	BE033_Aechmea_gustavoi		YES
1	BE166_Aechmea_saxicola	98.58%	YES
>Cluster 40				Ronnbergia Alliance	Aguirre-Santoro et al., 2017
0	BB126_Hohenbergia_polycephala		YES		Heller, 2018
1	BE443_Wittmackia_distans	98.98%	YES
>Cluster 41				Same Species
0	BE433_Aechmea_abbreviata		YES
1	BE538_Aechmea_abbreviata	98.78%	YES
>Cluster 42				Same Species
0	BE246_Aechmea_tonduzii		YES
1	BE427_Aechmea_tonduzii	100.00%	YES
>Cluster 43				Cryptanthoid complex (Rokautskyia)	Leme et al., 2017
0	BE621_Rokautskyia_roberto-kautskyi		YES
1	BE662_Rokautskyia_pseudoscaposa	99.54%	YES
>Cluster 44				No Support
0	BE094_Quesnelia_lateralis	98.09%	NO
1	BE160_Aechmea_purpureorosea		NO
>Cluster 45				Same Species
0	BE526_Aechmea_roberto_seidelii	98.72%
1	BE559_Aechmea_roberto_seodelii
>Cluster 46				Same Species
0	BE469_Aechmea_longifolia
1	BE546_Aechmea_longifolia	99.79%
>Cluster 47				No Support
0	BE209_Lymania_spiculata		NO
1	BE381_Aechmea_capixabae	98.01%	NO
>Cluster 48				No Support
0	BE410_Aechmea_bruggeri	99.11%	NO
1	BE468_Aechmea_chlorophylla		NO
>Cluster 49				Nidularioid group	Santos-Silva et al., 2017
0	BE131_Neoregelia_margaretae	98.66%			Heller, 2018
1	BE597_Neoregelia_myrmecophila
>Cluster 50				Same Species
0	BE574_Aechmea_ramosa_var_festiva
1	BE575_Aechmea_ramosa	98.66%
>Cluster 51				Cucullatanthus group	Heller et al., 2015
0	BE049_Quesnelia_edmundoi_var_rubrobracteata				Heller, 2018
1	BE074_Aechmea_bambusoides	98.34%

## Sheet: CD_Hit_Tillandsioideae
Cluster #	Sample/Taxon	% identity	Monophyletic	(Monophyletic) Group/Genus	Literature support
>Cluster 0				Tillandsia subgen. Diaphoranthema	Granados Mendoza et al., 2017
0	BRC241_Tillandsia_rectangula	98.57%	YES		Barfuss et al., 2016
1	BRC254_Tillandsia_esseriana	99.24%	Unknown
2	BRC300_Tillandsia_usneoides	100.00%	YES
3	BRC323_Tillandisa_marconae	99.20%	NO
4	BRC380_Tillandsia_landbeckii	100.00%	YES
5	BRC381_Tillandsia_landbeckii	100.00%	YES
6	BRC382_Tillandsia_landbeckii	100.00%	YES
7	BRC386_Tillandsia_landbeckii	100.00%	YES
8	BRC395_Tillandsia_usneoides	99.34%	YES
9	BRC398_Tillandsia_usneoides	99.63%	YES
10	BRC399_Tillandsia_usneoides	99.25%	YES
11	BRC400_Tillandsia_usneoides	98.74%	YES
12	BRC402_Tillandsia_usneoides	99.02%	YES
13	BRC403_Tillandsia_usneoides		YES
14	BRC416_Tillandsia_capillaris	98.24%	YES
>Cluster 1				Tillandsia subgen. Tillandsia	Granados Mendoza et al., 2017
0	BRC236_Tillandsia_guerreroensis	99.09%	NO		Barfuss et al., 2016
1	BRC248_Tillandsia_capitata	99.07%	YES		Gouda, E.J., Butcher, D. & Gouda, 2019
2	BRC301_Tillandsia_ehlersiana	99.23%	YES
3	BRC307_Tillandsia_nizandensis	98.38%	Unknown
4	BRC311_Tillandsia_tricolor	98.89%	YES
5	BRC327_Tillandsia_polita	98.55%	NO
6	BRC344_Tillandsia_calipaensis	99.07%	Unknown
7	BRC387_Tillandsia_delicata	99.27%	YES
8	BRC406_Tillandsia_ionantha		YES
9	BRC408_Tillandsia_ionantha	98.05%	YES
10	BRC430_Tillandsia_butzii	98.52%	YES
11	BRC433_Tillandsia_ferrisiana	98.20%	YES
12	BRC434_Tillandsia_ionantha	99.28%	YES
13	BRC437_Tillandsia_inonantha	98.66%	YES
>Cluster 2				Tillandsia subgen. Aerobia	Granados Mendoza et al., 2017
0	BRC225_Tillandsia_muhriae	98.93%	YES		Barfuss et al., 2016
1	BRC316_Tillandsia_friesii	99.07%	YES		Gouda, E.J., Butcher, D. & Gouda, 2019
2	BRC320_Tillandsia_didisticha	99.39%	YES
3	BRC390_Tillandsia_hegeri	98.88%	YES
4	BRC410_Tillandsia_xiphioides	99.26%	YES
5	BRC452_Tillandsia_xiphioides	98.57%	YES
6	BRC455_Tillandsia_xiphioides	98.32%	YES
7	BRC456_Tillandsia_xiphioides	98.66%	YES
8	BRC457_Tillandsia_bagua-grandensis		YES
>Cluster 3				Tillandsia subgen. Diaphoranthema	Granados Mendoza et al., 2017
0	BRC298_Tillandsia_capillaris	98.20%	YES		Barfuss et al., 2016
1	BRC383_Tillandsia_landbeckii	99.45%	YES
2	BRC384_Tillandsia_landbeckii	99.46%	YES
3	BRC385_Tillandsia_landbeckii	99.46%	YES
4	BRC396_Tillandsia_usneoides	98.74%	YES
5	BRC420_Tillandsia_capillaris		YES
6	BRC421_Tillandsia_capillaris	98.00%	YES
7	BRC424_Tillandsia_capillaris	99.63%	YES
>Cluster 4				Same Species
0	BRC326_Tillandsia_distichia	99.07%
1	BRC440_Tillandsia_distichia	100.00%
2	BRC441_Tillandsia_distichia	98.59%
3	BRC442_Tillandsia_distichia
4	BRC444_Tillandsia_distichia	98.83%
5	BRC445_Tillandsia_distichia	99.10%
6	BRC446_Tillandsia_distichia	99.10%
7	BRC448_Tillandsia_distichia	98.81%
>Cluster 5				Catopsis	Barfuss et al., 2016
0	BRC043_Catopsis_nutans		YES
1	BRC044_Catopsis_nutans	99.36%	YES
2	BRC045_Catopsis_nutans	99.32%	YES
3	BRC073_Catopsis_nutans	98.47%	YES
4	BRC199_Catopsis_minimiflora	98.65%	YES
5	BRC243_Tillandsia_delicatula	99.13%	NO
>Cluster 6				Tillandsia subgen. Tillandsia	Gouda, E.J., Butcher, D. & Gouda, 2019
0	BRC266_Tillandsia_harrisii	98.28%	YES
1	BRC267_Tillandsia_hondurensis	98.29%	YES
2	BRC331_Tillandsia_kammii	99.26%	YES
3	BRC349_Tillandsia_gerdae	98.66%	NO
4	BRC388_Tillandsia_plagiotropica		YES
>Cluster 7				Catopsis	Granados Mendoza et al., 2017
0	BRC041_Catopsis_floribunda				Gouda, E.J., Butcher, D. & Gouda, 2019
1	BRC042_Catopsis_floribunda	100.00%	YES
2	BRC046_Catopsis_sessiliflora	100.00%	YES
3	BRC195_Catopsis_subulata	98.60%	YES
4	BRC234_Catopsis_morreniana	100.00%	YES
>Cluster 8				Tillandsia subg. Viridantha	Gouda, E.J., Butcher, D. & Gouda, 2019
0	BRC170_Tillandsia_fendleri		NO
1	BRC337_Tillandsia_grandispica	98.50%	YES
2	BRC340_Tillandsia_oblivata	98.46%	YES
3	BRC348_Tillandsia_atroviridipetala	98.49%	YES
>Cluster 9
0	BRC312_Tillandsia_klausii	99.32%	NO
1	BRC318.1_Tillandsia_mitlaensis		NO
2	BRC330.1_Tillandsia_juncea	98.44%	NO
>Cluster 10
0	BRC224_Tillandsia_mollis	98.57%	NO
1	BRC319_Tillandsia_chiletensis	99.08%	NO
2	BRC418_Tillandsia_aizoides		NO
>Cluster 11
0	BRC173_Tillandsia_guenther-nolleri	99.22%	NO
1	BRC247_Tillandsia_atenangoensis		NO
2	BRC353_Tillandsia_mazatlanensis	99.01%	NO
>Cluster 12
0	BRC261_Tillandsia_polystachia	98.87%	NO
1	BRC309_Tillandsia_concolor		NO
2	BRC322_Tillandsia_balbisiana	98.92%	NO
>Cluster 13				Tillandsia subgen. Tillandsia	Granados Mendoza et al., 2017
0	BRC238_Tillandisa_schiedeana	99.11%	YES		Gouda, E.J., Butcher, D. & Gouda, 2019
1	BRC240_Tillandsia_remota		YES
2	BRC313_Tillandsia_seleriana	98.94%	YES
>Cluster 14				Same Species
0	BRC404_Tillandsia_ionantha
1	BRC438_Tillandsia_inonantha	99.74%
>Cluster 16
0	BRC280_Tillandsia_mima		NO
1	BRC288_Tillandsia_lymanii	100.00%	NO
>Cluster 17				Tillandsia rauhii complex	Barfuss et al., 2016
0	BRC186_Tillandsia_rauhii	99.81%	YES
1	BRC210_Tillandsia_teres		YES
>Cluster 18				Tillandsia subgen. Phytarrhiza	Barfuss et al., 2016
0	BRC246_Tillandsia_kirschnekii	98.24%	YES
1	BRC341_Tillandsia_paleacea		YES
>Cluster 19				Tillandsia subgen. Aerobia	Gouda, E.J., Butcher, D. & Gouda, 2019
0	BRC264_Tillandsia_cardenasii	99.02%	YES
1	BRC281_Tillandsia_lorentziana		YES
>Cluster 20
0	BRC252_Tillandsia_mirabilis		NO
1	BRC272_Tillandsia_atroviolacea	98.46%	NO
>Cluster 21
0	BRC242_Tillandsia_recurvata	99.07%	NO
1	BRC460_Tillandsia_streptocarpa		NO
>Cluster 22				Guzmania	Barfuss et al., 2016
0	BRC049_Guzmania_rhonhofiana	98.36%	YES		Granados Mendoza et al., 2017
1	BRC142_Guzmania_lingulata		YES		Gouda, E.J., Butcher, D. & Gouda, 2019
>Cluster 23				Guzmania	Barfuss et al., 2016
0	BRC135_Guzmania_calothyrsus	99.02%	YES		Granados Mendoza et al., 2017
1	BRC139_Guzmania_alliodora		YES		Gouda, E.J., Butcher, D. & Gouda, 2019
>Cluster 24				Tillandsia sphaerocephala complex	Barfuss et al., 2016
0	BRC286_Tillandsia_sphaerocephala	99.80%	YES
1	BRC435_Tillandsia_nana		YES
>Cluster 25				Tillandsia subgen. Tillandsia	Granados Mendoza et al., 2017
0	BRC274_Tillandsia_ferreyrae	98.00%	YES
1	BRC276_Tillandsia_propagulifera		YES
>Cluster 26
0	BRC289_Tillandsia_huarzensis		NO
1	BRC366_Tillandsia_kauffmannii	99.11%	NO
>Cluster 27				Tillandsia subgen. Allardtia	Gouda, E.J., Butcher, D. & Gouda, 2019
0	BRC051_Racinaea_ropalocarpa	99.73%	YES
1	BRC208_Racinaea_fraseri		YES
>Cluster 28				Vriesea	Barfuss et al., 2016
0	BRC062_Vriesea_glutinosa	99.59%	YES		Granados Mendoza et al., 2017
1	BRC063_Vriesea_splendens		YES		Gouda, E.J., Butcher, D. & Gouda, 2019
>Cluster 29
0	BRC127_Mezobromelia_capituligera	99.38%	NO
1	BRC213_Vriesea_elata		NO
>Cluster 30				Tillandsia subgen. Pseudovriesea	Gouda, E.J., Butcher, D. & Gouda, 2019
0	BRC304_Vriesea_hitchcockiana		YES
1	BRC364_Tillandsia_werneriana	99.55%	YES
>Cluster 31				Tillandsia subgen. Anoplophytum	Barfuss et al., 2016
0	BRC185_Tillandsia_tenuifolia		YES
1	BRC306_Tillandsia_ixioides	98.70%	YES
>Cluster 32
0	BRC202_Tillandisa_macbrideana		NO
1	BRC314_Tillandsia_muhriae	99.26%	NO
>Cluster 33				Guzmania	Barfuss et al., 2016
0	BRC137_Guzmania_bracteosa		YES		Granados Mendoza et al., 2017
1	BRC140_Guzmania_osyana	99.55%	YES		Gouda, E.J., Butcher, D. & Gouda, 2019
>Cluster 34				Same Species
0	BRC422_Tillandsia_capillaris
1	BRC426_Tillandsia_capillaris	99.78%

## Sheet: CD_Hit_Pitcairnioideae
Cluster #	Sample/Taxon	% Identity	Monophyletic	(Monophyletic) Group/Genus	Literature support
>Cluster 0				Deuterocohnia	Schütz et al., 2016
0	BRC163_Deuterocohnia_strobilifera	98.26%	YES
1	BRC166_Deuterocohnia_recurvipetala	98.96%	YES
2	BRC291_Deuterocohnia_abstrusa		YES
>Cluster 1				Pitcairnia	Schütz et al., 2016
0	BRC032_Pitcairnia_corallina		YES
1	BRC109_Pitcairnia_pseudoundulata	98.27%	YES
2	BRC112_Pitcairnia_chiapensis	98.19%	YES
>Cluster 2				Pitcairnia	Schütz et al., 2016
0	BRC123_Pitcairnia_rectiflora		YES
1	BRC138_Pitcairnia_riparia	99.82%	YES
>Cluster 3				Fosterella	Schütz et al., 2016
0	BRC067_Fosterella_caulescens	98.23%	YES
1	BRC084_Fosterella_rusbyi		YES
>Cluster 4				Pitcairnia	Schütz et al., 2016
0	BRC121_Pitcairnia_wendlandii	99.76%	YES
1	BRC136_Pitcairnia_roseoalba		YES
>Cluster 5				Pitcairnia	Schütz et al., 2016
0	BRC116_Pitcairnia_recurvata	99.11%	YES
1	BRC119_Pitcairnia_elvirae		YES
>Cluster 6				Fosterella	Schütz et al., 2016
0	BRC085_Fosterella_weberbaueri	100.00%	YES
1	BRC130_Fosterella_chaparensis		YES
>Cluster 7				Pitcairnia	Schütz et al., 2016
0	BRC070_Pitcairnia_wendlandii	98.09%	YES
1	BRC113_Picairnia_nigra		YES

## Sheet: agt1_BLAST_Search_Intron_Exon
Genus/Clade level	Species level	Sequence BLASTed against Agt1 Bromeliaceae BLAST Megablast Database	MegaBLAST results - only first 10 hits shown	# Nucleotide Sequences With Mates	# Nucleotides	# Sequences	% Identical Sites	% Pairwise Identity	%GC	Bit-Score	Created Date	Database	Description	E Value	Free end gaps	Grade
		BE168_Aechmea_phanerophlebia	BE168_Aechmea_phanerophlebia	0	1008	2	100.0%	100.0%	47.2%	931832	Wed Jan 23 09:41:52 CET 2019	Agt1 Bromeliaceae BLAST		0	true	100.0%
			BE374_Aechmea_phanerophlebia	0	1008	2	98.0%	98.1%	47.1%	878279	Wed Jan 23 09:41:52 CET 2019	Agt1 Bromeliaceae BLAST		0	true	99.1%
			BE279_Aechmea_nudicaulis	0	1007	2	97.2%	97.2%	47.3%	852426	Wed Jan 23 09:41:52 CET 2019	Agt1 Bromeliaceae BLAST		0	true	98.6%
			BE174_Aechmea_nudicaulis	0	1008	2	97.0%	97.2%	47.6%	852426	Wed Jan 23 09:41:52 CET 2019	Agt1 Bromeliaceae BLAST		0	true	98.6%
NEGATIVE	POSITIVE		BE342_Aechmea_aiuruocensis	0	998	2	97.0%	97.2%	48.0%	843193	Wed Jan 23 09:41:53 CET 2019	Agt1 Bromeliaceae BLAST		0	true	98.6%
			BE533_Quesnelia_kautskyi	0	1002	2	96.3%	96.3%	47.4%	821033	Wed Jan 23 09:41:53 CET 2019	Agt1 Bromeliaceae BLAST		0	true	98.1%
			BRC393_Aechmea nudicaulis	0	999	2	96.2%	96.2%	47.3%	817339	Wed Jan 23 09:41:53 CET 2019	Agt1 Bromeliaceae BLAST	2 reads from FB_BRC393 assembled using Geneious	0	true	97.5%
			BE400_Aechmea_triticina	0	1002	2	96.1%	96.2%	47.5%	817339	Wed Jan 23 09:41:53 CET 2019	Agt1 Bromeliaceae BLAST		0	true	98.1%
			BRC428_Aechmea nudicaulis	0	997	2	96.2%	96.2%	47.4%	815493	Wed Jan 23 09:41:53 CET 2019	Agt1 Bromeliaceae BLAST	2 reads from FB_BRC428 assembled using Geneious	0	true	97.4%
			BE531_Aechmea_hoppii	0	1000	2	96.0%	96.1%	47.0%	815493	Wed Jan 23 09:41:53 CET 2019	Agt1 Bromeliaceae BLAST		0	true	98.1%
			MegaBLAST results - only first 10 hits shown	# Nucleotide Sequences With Mates	# Nucleotides	# Sequences	% Identical Sites	% Pairwise Identity	%GC	Bit-Score	Created Date	Database	Description	E Value	Free end gaps	Grade
		BE246_Aechmea_tonduzii	BE427_Aechmea_tonduzii	0	982	2	100.0%	100.0%	48.1%	907825	Wed Jan 23 09:43:32 CET 2019	Agt1 Bromeliaceae BLAST		0	true	100.0%
			BE246_Aechmea_tonduzii	0	982	2	100.0%	100.0%	48.1%	907825	Wed Jan 23 09:43:32 CET 2019	Agt1 Bromeliaceae BLAST		0	true	100.0%
			BE548_Wittmackia_ituberaensis	0	982	2	96.7%	96.7%	47.7%	819186	Wed Jan 23 09:43:32 CET 2019	Agt1 Bromeliaceae BLAST		0	true	98.4%
			BE443_Wittmackia_distans	0	982	2	96.5%	96.6%	47.1%	815493	Wed Jan 23 09:43:32 CET 2019	Agt1 Bromeliaceae BLAST		0	true	98.3%
Wittmackia Ronnbergia group			BE392_Wittmackia_amorimii	0	982	2	96.5%	96.5%	47.3%	813646	Wed Jan 23 09:43:32 CET 2019	Agt1 Bromeliaceae BLAST		0	true	98.3%
Heller 2018			BE521_Wittmackia_tentaculifera	0	982	2	96.3%	96.4%	48.0%	809953	Wed Jan 23 09:43:32 CET 2019	Agt1 Bromeliaceae BLAST		0	true	98.2%
			BE386_Wittmackia_incompta	0	982	2	96.3%	96.3%	47.5%	808106	Wed Jan 23 09:43:32 CET 2019	Agt1 Bromeliaceae BLAST		0	true	98.2%
			BE415_Wittmackia_lingulatoides	0	982	2	96.1%	96.1%	47.3%	802566	Wed Jan 23 09:43:32 CET 2019	Agt1 Bromeliaceae BLAST		0	true	98.1%
			BE401_Wittmackia_turbinocalyx	0	982	2	96.1%	96.1%	47.5%	802566	Wed Jan 23 09:43:32 CET 2019	Agt1 Bromeliaceae BLAST		0	true	98.1%
			BE503_Aechmea_sphaerocephala	0	987	2	96.0%	96.0%	47.6%	800.72	Wed Jan 23 09:43:32 CET 2019	Agt1 Bromeliaceae BLAST		0	true	98.0%
			MegaBLAST results - only first 10 hits shown	# Nucleotide Sequences With Mates	# Nucleotides	# Sequences	% Identical Sites	% Pairwise Identity	%GC	Bit-Score	Created Date	Database	Description	E Value	Free end gaps	Grade
		BE360_Edmundoa_lindenii	BE360_Edmundoa_lindenii	0	1000	2	100.0%	99.8%	47.6%	917059	Wed Jan 23 09:44:06 CET 2019	Agt1 Bromeliaceae BLAST		0	true	99.9%
			BE136_Edmundoa_lindenii	0	1000	2	99.6%	99.8%	47.4%	917059	Wed Jan 23 09:44:06 CET 2019	Agt1 Bromeliaceae BLAST		0	true	99.9%
			BE180_Canistropsis_billbergioides	0	1000	2	99.4%	99.6%	47.2%	911519	Wed Jan 23 09:44:06 CET 2019	Agt1 Bromeliaceae BLAST		0	true	99.8%
Nidularioid group			BE583_Neoregelia_pascoaliana	0	1000	2	99.0%	99.2%	47.0%	900439	Wed Jan 23 09:44:06 CET 2019	Agt1 Bromeliaceae BLAST		0	true	99.6%
Heller 2018			BE482_Edmundoa_ambigua	0	1000	2	98.8%	99.0%	47.0%	894899	Wed Jan 23 09:44:07 CET 2019	Agt1 Bromeliaceae BLAST		0	true	99.5%
			BE489_Eduandrea_selloana	0	998	2	98.8%	99.0%	47.4%	893052	Wed Jan 23 09:44:07 CET 2019	Agt1 Bromeliaceae BLAST		0	true	99.5%
			BE302_Canistropsis correia-araujoi	0	1000	2	98.4%	99.1%	47.4%	893052	Wed Jan 23 09:44:07 CET 2019	Agt1 Bromeliaceae BLAST		0	true	99.6%
			BE578_Neoregelia_tenebrosa	0	1000	2	98.6%	98.8%	47.8%	889359	Wed Jan 23 09:44:07 CET 2019	Agt1 Bromeliaceae BLAST		0	true	99.4%
			BE459_Nidularium campoalegrense	0	998	2	98.6%	98.8%	47.6%	887512	Wed Jan 23 09:44:07 CET 2019	Agt1 Bromeliaceae BLAST		0	true	99.4%
			BE175_Wittrockia_gigantea	0	998	2	98.6%	98.8%	48.2%	887512	Wed Jan 23 09:44:07 CET 2019	Agt1 Bromeliaceae BLAST		0	true	99.4%
			MegaBLAST results - only first 10 hits shown	# Nucleotide Sequences With Mates	# Nucleotides	# Sequences	% Identical Sites	% Pairwise Identity	%GC	Bit-Score	Created Date	Database	Description	E Value	Free end gaps	Grade
		BE433_Aechmea_abbreviata	BE538_Aechmea_abbreviata	0	984	2	98.8%	99.4%	49.0%	887512	Wed Jan 23 09:46:02 CET 2019	Agt1 Bromeliaceae BLAST		0	true	99.7%
			BE433_Aechmea_abbreviata	0	984	2	100.0%	99.4%	49.2%	887512	Wed Jan 23 09:46:02 CET 2019	Agt1 Bromeliaceae BLAST		0	true	99.7%
			BE444_Aechmea_moorei	0	984	2	98.4%	99.1%	48.7%	878279	Wed Jan 23 09:46:02 CET 2019	Agt1 Bromeliaceae BLAST		0	true	99.5%
Principal Amazonina Aechmea group			BE502_Aechmea_cucullata	0	984	2	98.4%	99.0%	49.0%	876432	Wed Jan 23 09:46:03 CET 2019	Agt1 Bromeliaceae BLAST		0	true	99.5%
Heller 2018			BE044_Aechmea_tessmannii	0	984	2	98.6%	99.0%	48.8%	876432	Wed Jan 23 09:46:03 CET 2019	Agt1 Bromeliaceae BLAST		0	true	99.5%
			BE474_Aechmea_contracta	0	984	2	98.2%	99.0%	48.8%	874586	Wed Jan 23 09:46:03 CET 2019	Agt1 Bromeliaceae BLAST		0	true	99.5%
			BE402_Aechmea_roeseliae	0	993	2	96.2%	96.8%	48.3%	822879	Wed Jan 23 09:46:03 CET 2019	Agt1 Bromeliaceae BLAST		0	true	98.4%
			BE531_Aechmea_hoppii	0	988	2	95.8%	96.5%	47.0%	809953	Wed Jan 23 09:46:03 CET 2019	Agt1 Bromeliaceae BLAST		0	true	98.2%
			BE497_Aechmea_rodriguesiana	0	984	2	95.9%	96.5%	47.8%	809953	Wed Jan 23 09:46:03 CET 2019	Agt1 Bromeliaceae BLAST		0	true	98.3%
			BE552_Aechmea_polyantha	0	984	2	95.5%	96.4%	47.8%	804413	Wed Jan 23 09:46:03 CET 2019	Agt1 Bromeliaceae BLAST		0	true	98.2%
			MegaBLAST results - only first 10 hits shown	# Nucleotide Sequences With Mates	# Nucleotides	# Sequences	% Identical Sites	% Pairwise Identity	%GC	Bit-Score	Created Date	Database	Description	E Value	Free end gaps	Grade
		BE434_Aechmea_allenii	BE435_Aechmea_allenii	0	1002	2	99.4%	99.7%	46.5%	915212	Wed Jan 23 09:46:35 CET 2019	Agt1 Bromeliaceae BLAST		0	true	99.9%
			BE434_Aechmea_allenii	0	1002	2	100.0%	99.7%	46.4%	915212	Wed Jan 23 09:46:35 CET 2019	Agt1 Bromeliaceae BLAST		0	true	99.9%
			BE392_Wittmackia_amorimii	0	992	2	96.0%	96.3%	47.3%	811799	Wed Jan 23 09:46:35 CET 2019	Agt1 Bromeliaceae BLAST		0	true	98.2%
Wittmackie Ronnbergia group			BE548_Wittmackia_ituberaensis	0	992	2	95.8%	96.1%	47.7%	806.26	Wed Jan 23 09:46:35 CET 2019	Agt1 Bromeliaceae BLAST		0	true	98.1%
Heller 2018			BE386_Wittmackia_incompta	0	992	2	95.8%	96.1%	47.5%	806.26	Wed Jan 23 09:46:35 CET 2019	Agt1 Bromeliaceae BLAST		0	true	98.1%
			BE415_Wittmackia_lingulatoides	0	992	2	95.6%	95.9%	47.3%	800.72	Wed Jan 23 09:46:35 CET 2019	Agt1 Bromeliaceae BLAST		0	true	98.0%
			BE401_Wittmackia_turbinocalyx	0	992	2	95.6%	95.9%	47.5%	800.72	Wed Jan 23 09:46:35 CET 2019	Agt1 Bromeliaceae BLAST		0	true	98.0%
			BE521_Wittmackia_tentaculifera	0	992	2	95.4%	95.8%	48.0%	797026	Wed Jan 23 09:46:35 CET 2019	Agt1 Bromeliaceae BLAST		0	true	97.9%
			BE408_Ronnbergia_fraseri	0	992	2	95.4%	95.9%	47.2%	797026	Wed Jan 23 09:46:35 CET 2019	Agt1 Bromeliaceae BLAST		0	true	98.0%
			BE250_Wittmackia_sulbahianensis	0	992	2	95.4%	95.8%	47.6%	797026	Wed Jan 23 09:46:35 CET 2019	Agt1 Bromeliaceae BLAST		0	true	97.9%
			MegaBLAST results - only first 10 hits shown	# Nucleotide Sequences With Mates	# Nucleotides	# Sequences	% Identical Sites	% Pairwise Identity	%GC	Bit-Score	Created Date	Database	Description	E Value	Free end gaps	Grade
		BE442_Hohenbergiopsis_guatemalensis	BE442_Hohenbergiopsis_guatemalensis	0	990	2	100.0%	99.4%	47.6%	893052	Wed Jan 23 09:46:59 CET 2019	Agt1 Bromeliaceae BLAST		0	true	99.7%
			BE570_Hohenbergiopsis_guatemalensis	0	990	2	98.0%	98.6%	47.9%	870892	Wed Jan 23 09:46:59 CET 2019	Agt1 Bromeliaceae BLAST		0	true	99.3%
			BE040_Aechmea_lueddemanniana	0	990	2	96.4%	97.0%	47.3%	826573	Wed Jan 23 09:46:59 CET 2019	Agt1 Bromeliaceae BLAST		0	true	98.5%
Central American group			BE455_Ursulaea_tuitensis	0	990	2	96.2%	96.8%	46.9%	821033	Wed Jan 23 09:46:59 CET 2019	Agt1 Bromeliaceae BLAST		0	true	98.4%
Heller 2018			BE344_Aechmea_marginalis	0	990	2	96.0%	96.7%	47.6%	817339	Wed Jan 23 09:46:59 CET 2019	Agt1 Bromeliaceae BLAST		0	true	98.3%
			BE606_Androlepis_fragrans	0	990	2	96.0%	96.6%	47.7%	815493	Wed Jan 23 09:46:59 CET 2019	Agt1 Bromeliaceae BLAST		0	true	98.3%
			BE460_Aechmea mariae-reginae	0	990	2	95.8%	96.7%	47.5%	815493	Wed Jan 23 09:46:59 CET 2019	Agt1 Bromeliaceae BLAST		0	true	98.3%
			BE445_Ursulaea_macvaughii	0	990	2	95.8%	96.3%	46.9%	808106	Wed Jan 23 09:46:59 CET 2019	Agt1 Bromeliaceae BLAST		0	true	98.1%
			BE166_Aechmea_saxicola	0	989	2	95.8%	96.4%	46.9%	808106	Wed Jan 23 09:46:59 CET 2019	Agt1 Bromeliaceae BLAST		0	true	98.2%
			BE392_Wittmackia_amorimii	0	986	2	95.6%	96.2%	47.3%	800.72	Wed Jan 23 09:46:59 CET 2019	Agt1 Bromeliaceae BLAST		0	true	98.1%
			MegaBLAST results - only first 10 hits shown	# Nucleotide Sequences With Mates	# Nucleotides	# Sequences	% Identical Sites	% Pairwise Identity	%GC	Bit-Score	Created Date	Database	Description	E Value	Free end gaps	Grade
		BE449_Aechmea_hoppii	BE449_Aechmea_hoppii	0	992	2	100.0%	99.5%	47.4%	898592	Wed Jan 23 09:47:54 CET 2019	Agt1 Bromeliaceae BLAST		0	true	99.7%
			BE531_Aechmea_hoppii	0	992	2	98.6%	99.2%	47.0%	889359	Wed Jan 23 09:47:54 CET 2019	Agt1 Bromeliaceae BLAST		0	true	99.6%
			BE497_Aechmea_rodriguesiana	0	988	2	96.6%	97.1%	47.8%	828419	Wed Jan 23 09:47:54 CET 2019	Agt1 Bromeliaceae BLAST		0	true	98.5%
Principal Amazonina Aechmea group			BE046_Aechmea_nidularioides	0	989	2	96.2%	97.3%	47.7%	828419	Wed Jan 23 09:47:54 CET 2019	Agt1 Bromeliaceae BLAST		0	true	98.6%
Heller 2018			BE342_Aechmea_aiuruocensis	0	990	2	96.6%	97.0%	48.0%	826573	Wed Jan 23 09:47:54 CET 2019	Agt1 Bromeliaceae BLAST		0	true	98.5%
			BE552_Aechmea_polyantha	0	988	2	96.2%	97.0%	47.8%	822879	Wed Jan 23 09:47:54 CET 2019	Agt1 Bromeliaceae BLAST		0	true	98.5%
			BE403_Aechmea_egleriana	0	988	2	96.4%	96.9%	47.4%	822879	Wed Jan 23 09:47:54 CET 2019	Agt1 Bromeliaceae BLAST		0	true	98.4%
			BE474_Aechmea_contracta	0	988	2	96.2%	96.9%	48.8%	821033	Wed Jan 23 09:47:54 CET 2019	Agt1 Bromeliaceae BLAST		0	true	98.4%
			BE591_Aechmea_paniculata	0	988	2	96.0%	96.9%	47.7%	819186	Wed Jan 23 09:47:54 CET 2019	Agt1 Bromeliaceae BLAST		0	true	98.4%
			BE444_Aechmea_moorei	0	988	2	96.2%	96.8%	48.7%	819186	Wed Jan 23 09:47:54 CET 2019	Agt1 Bromeliaceae BLAST		0	true	98.4%
			MegaBLAST results - only first 10 hits shown	# Nucleotide Sequences With Mates	# Nucleotides	# Sequences	% Identical Sites	% Pairwise Identity	%GC	Bit-Score	Created Date	Database	Description	E Value	Free end gaps	Grade
		BE469_Aechmea_longifolia	BE469_Aechmea_longifolia	0	942	2	100.0%	100.0%	48.6%	870892	Wed Jan 23 09:50:33 CET 2019	Agt1 Bromeliaceae BLAST		0	true	100.0%
			BE546_Aechmea_longifolia	0	942	2	99.8%	99.9%	48.5%	867199	Wed Jan 23 09:50:33 CET 2019	Agt1 Bromeliaceae BLAST		0	true	99.9%
			BE580_Billbergia_seidelii	0	943	2	96.0%	96.1%	47.8%	767.48	Wed Jan 23 09:50:33 CET 2019	Agt1 Bromeliaceae BLAST		0	true	98.1%
			BE497_Aechmea_rodriguesiana	0	963	2	94.3%	94.3%	47.8%	734.24	Wed Jan 23 09:50:33 CET 2019	Agt1 Bromeliaceae BLAST		0	true	97.2%
			BE559_Aechmea_roberto_seodelii	0	945	2	94.6%	94.7%	47.6%	730547	Wed Jan 23 09:50:33 CET 2019	Agt1 Bromeliaceae BLAST		0	true	97.3%
			BE046_Aechmea_nidularioides	0	964	2	93.9%	94.1%	47.7%	728.7	Wed Jan 23 09:50:33 CET 2019	Agt1 Bromeliaceae BLAST		0	true	97.1%
			BE552_Aechmea_polyantha	0	963	2	93.9%	94.1%	47.8%	726854	Wed Jan 23 09:50:33 CET 2019	Agt1 Bromeliaceae BLAST		0	true	97.1%
			BE591_Aechmea_paniculata	0	963	2	93.7%	94.1%	47.7%	725007	Wed Jan 23 09:50:33 CET 2019	Agt1 Bromeliaceae BLAST		0	true	97.1%
			BE531_Aechmea_hoppii	0	967	2	93.8%	93.9%	47.0%	723.16	Wed Jan 23 09:50:33 CET 2019	Agt1 Bromeliaceae BLAST		0	true	96.9%
			BE403_Aechmea_egleriana	0	963	2	93.9%	93.9%	47.4%	723.16	Wed Jan 23 09:50:33 CET 2019	Agt1 Bromeliaceae BLAST		0	true	97.0%
			MegaBLAST results - only first 10 hits shown	# Nucleotide Sequences With Mates	# Nucleotides	# Sequences	% Identical Sites	% Pairwise Identity	%GC	Bit-Score	Created Date	Database	Description	E Value	Free end gaps	Grade
		BE475_Quesnelia_edmundoi_var_edmundoi	BE475_Quesnelia_edmundoi_var_edmundoi	0	912	2	100.0%	99.9%	50.1%	839499	Wed Jan 23 09:51:06 CET 2019	Agt1 Bromeliaceae BLAST		0	true	99.9%
			BE622_Quesnelia_edmundoi_var_edmundoi	0	908	2	99.1%	99.2%	50.2%	819186	Wed Jan 23 09:51:06 CET 2019	Agt1 Bromeliaceae BLAST		0	true	99.4%
			BE630_Quesnelia_edmundoi_var_rubrobracteata	0	909	2	98.5%	98.7%	50.0%	804413	Wed Jan 23 09:51:06 CET 2019	Agt1 Bromeliaceae BLAST		0	true	99.3%
Cucullatanthus group			BE582_Quesnelia_tubifolia	0	905	2	95.4%	96.1%	49.9%	730547	Wed Jan 23 09:51:06 CET 2019	Agt1 Bromeliaceae BLAST		0	true	98.0%
Heller 2018			BE077_Canistrum_fosterianum	0	900	2	95.6%	95.7%	49.8%	723.16	Wed Jan 23 09:51:06 CET 2019	Agt1 Bromeliaceae BLAST		0	true	97.9%
			BB107_Aechmea_atrovittata	0	900	2	95.6%	95.7%	49.8%	723.16	Wed Jan 23 09:51:06 CET 2019	Agt1 Bromeliaceae BLAST		0	true	97.9%
			BE056_Aechmea_disjuncta	0	896	2	95.6%	95.7%	50.0%	719467	Wed Jan 23 09:51:06 CET 2019	Agt1 Bromeliaceae BLAST		0	true	97.6%
			BE511_Aechmea_disjuncta	0	900	2	95.0%	95.1%	50.5%	706.54	Wed Jan 23 09:51:06 CET 2019	Agt1 Bromeliaceae BLAST		0	true	97.5%
			BE087_Aechmea_gurkeniana	0	904	2	94.6%	94.7%	50.0%	699154	Wed Jan 23 09:51:06 CET 2019	Agt1 Bromeliaceae BLAST		0	true	97.3%
			BE620_Aechmea_fosteriana_var_rupicola	0	917	2	93.6%	93.7%	49.9%	682534	Wed Jan 23 09:51:06 CET 2019	Agt1 Bromeliaceae BLAST		0	true	96.9%
			MegaBLAST results - only first 10 hits shown	# Nucleotide Sequences With Mates	# Nucleotides	# Sequences	% Identical Sites	% Pairwise Identity	%GC	Bit-Score	Created Date	Database	Description	E Value	Free end gaps	Grade
		BE500_Ananas_ananassioides	BE500_Ananas_ananassioides	0	988	2	100.0%	100.0%	46.6%	913365	Wed Jan 23 09:56:49 CET 2019	Agt1 Bromeliaceae BLAST		0	true	100.0%
			BE495_Ananas_comosus	0	988	2	99.6%	99.7%	46.5%	904132	Wed Jan 23 09:56:49 CET 2019	Agt1 Bromeliaceae BLAST		0	true	99.8%
			BE501_Ananas_ananassioides	0	988	2	99.4%	99.6%	46.2%	900439	Wed Jan 23 09:56:49 CET 2019	Agt1 Bromeliaceae BLAST		0	true	99.8%
Ananas clade			BE210_Ananas_ananassioides	0	988	2	99.4%	99.6%	46.2%	900439	Wed Jan 23 09:56:49 CET 2019	Agt1 Bromeliaceae BLAST		0	true	99.8%
Heller 2018			BE178_Ananas_fritzmuelleri	0	989	2	99.0%	99.0%	46.7%	885665	Wed Jan 23 09:56:49 CET 2019	Agt1 Bromeliaceae BLAST		0	true	99.5%
			BE499_Ananas_bracteatus	0	988	2	98.2%	99.0%	45.8%	878279	Wed Jan 23 09:56:49 CET 2019	Agt1 Bromeliaceae BLAST		0	true	99.5%
			BE276_Neoglaziovia burle-marxii	0	988	2	96.4%	97.2%	47.4%	828419	Wed Jan 23 09:56:49 CET 2019	Agt1 Bromeliaceae BLAST		0	true	98.6%
			BE652_Cryptanthus_glazioui	0	986	2	96.8%	96.8%	48.0%	822879	Wed Jan 23 09:56:49 CET 2019	Agt1 Bromeliaceae BLAST		0	true	98.4%
			BE651_Hoplocryptanthus_schwackeanus	0	986	2	96.8%	96.8%	47.8%	822879	Wed Jan 23 09:56:49 CET 2019	Agt1 Bromeliaceae BLAST		0	true	98.4%
			BE650_Lapanthus_vidaliorum	0	986	2	96.8%	96.8%	47.4%	822879	Wed Jan 23 09:56:49 CET 2019	Agt1 Bromeliaceae BLAST		0	true	98.4%
			MegaBLAST results - only first 10 hits shown	# Nucleotide Sequences With Mates	# Nucleotides	# Sequences	% Identical Sites	% Pairwise Identity	%GC	Bit-Score	Created Date	Database	Description	E Value	Free end gaps	Grade
		BE526_Aechmea_roberto_seidelii	BE526_Aechmea_roberto_seidelii	0	934	2	100.0%	99.6%	48.4%	848732	Wed Jan 23 09:57:34 CET 2019	Agt1 Bromeliaceae BLAST		0	true	99.8%
			BE559_Aechmea_roberto_seodelii	0	934	2	98.7%	98.9%	47.6%	832113	Wed Jan 23 09:57:34 CET 2019	Agt1 Bromeliaceae BLAST		0	true	99.5%
			BE148_Aechmea_pineliana_var_pineliana	0	927	2	96.1%	96.6%	48.9%	763787	Wed Jan 23 09:57:34 CET 2019	Agt1 Bromeliaceae BLAST		0	true	98.3%
Aechmea subgen Macrochordion Pothuava Chevaliera group			BE580_Billbergia_seidelii	0	932	2	95.6%	96.1%	47.8%	754553	Wed Jan 23 09:57:34 CET 2019	Agt1 Bromeliaceae BLAST		0	true	98.0%
Heller 2018			BE546_Aechmea_longifolia	0	931	2	94.5%	94.7%	48.6%	717.62	Wed Jan 23 09:57:34 CET 2019	Agt1 Bromeliaceae BLAST		0	true	97.4%
			BE469_Aechmea_longifolia	0	931	2	94.3%	94.7%	48.7%	717.62	Wed Jan 23 09:57:34 CET 2019	Agt1 Bromeliaceae BLAST		0	true	97.4%
			BE094_Quesnelia_lateralis	0	930	2	93.0%	93.4%	47.4%	684381	Wed Jan 23 09:57:34 CET 2019	Agt1 Bromeliaceae BLAST		0	true	96.7%
			BE080_Aechmea_triangulari	0	821	2	96.1%	96.5%	47.8%	675147	Wed Jan 23 09:57:34 CET 2019	Agt1 Bromeliaceae BLAST		0	true	92.0%
			BE160_Aechmea_purpureorosea	0	934	2	92.0%	92.6%	47.5%	664068	Wed Jan 23 09:57:34 CET 2019	Agt1 Bromeliaceae BLAST		0	true	96.3%
			BE468_Aechmea_chlorophylla	0	787	2	96.7%	97.1%	48.7%	660374	Wed Jan 23 09:57:34 CET 2019	Agt1 Bromeliaceae BLAST		0	true	90.4%
			MegaBLAST results - only first 10 hits shown	# Nucleotide Sequences With Mates	# Nucleotides	# Sequences	% Identical Sites	% Pairwise Identity	%GC	Bit-Score	Created Date	Database	Description	E Value	Free end gaps	Grade
		BE542_Aechmea_weilbachii_var_weilbachii_forma_viridisepala	BE542_Aechmea_weilbachii_var_weilbachii_forma_viridisepala	0	896	2	100.0%	99.8%	49.3%	821033	Wed Jan 23 09:57:57 CET 2019	Agt1 Bromeliaceae BLAST		0	true	99.9%
			BE545_Aechmea_weilbachii_var_weilbachii_forma_pendula	0	896	2	99.1%	99.4%	49.7%	809953	Wed Jan 23 09:57:57 CET 2019	Agt1 Bromeliaceae BLAST		0	true	99.7%
			BE540_Aechmea_weilbachii_var_albipetala	0	896	2	98.9%	99.3%	49.8%	808106	Wed Jan 23 09:57:57 CET 2019	Agt1 Bromeliaceae BLAST		0	true	99.7%
Aechmea weilbachii Aechmea azurea complex Quesnelia dubia complex			BB113_Aechmea_chrysocoma	0	892	2	97.5%	97.8%	49.3%	767.48	Wed Jan 23 09:57:57 CET 2019	Agt1 Bromeliaceae BLAST		0	true	98.9%
Heller 2018			BE292_Quesnelia_clavata	0	892	2	97.1%	97.7%	49.2%	761.94	Wed Jan 23 09:57:57 CET 2019	Agt1 Bromeliaceae BLAST		0	true	98.8%
			BE090_Aechmea_guainumbiorum	0	890	2	97.1%	97.8%	49.4%	761.94	Wed Jan 23 09:57:57 CET 2019	Agt1 Bromeliaceae BLAST		0	true	98.8%
			BE070_Canistrum_aurantiacum	0	893	2	97.3%	97.6%	49.2%	761.94	Wed Jan 23 09:57:57 CET 2019	Agt1 Bromeliaceae BLAST		0	true	98.8%
			BE101_Aechmea_aquilega	0	890	2	97.3%	97.5%	49.0%	760093	Wed Jan 23 09:57:57 CET 2019	Agt1 Bromeliaceae BLAST		0	true	98.7%
			BE393_Aechmea_blanchetiana	0	892	2	97.1%	97.3%	49.3%	756.4	Wed Jan 23 09:57:57 CET 2019	Agt1 Bromeliaceae BLAST		0	true	98.7%
			BE243_Aechmea_leptantha	0	892	2	97.1%	97.3%	48.6%	756.4	Wed Jan 23 09:57:57 CET 2019	Agt1 Bromeliaceae BLAST		0	true	98.7%
			MegaBLAST results - only first 10 hits shown	# Nucleotide Sequences With Mates	# Nucleotides	# Sequences	% Identical Sites	% Pairwise Identity	%GC	Bit-Score	Created Date	Database	Description	E Value	Free end gaps	Grade
		BE574_Aechmea_ramosa_var_festiva	BE574_Aechmea_ramosa_var_festiva	0	896	2	100.0%	99.6%	50.1%	813646	Wed Jan 23 09:58:21 CET 2019	Agt1 Bromeliaceae BLAST		0	true	99.8%
			BE575_Aechmea_ramosa	0	896	2	98.7%	99.1%	50.0%	802566	Wed Jan 23 09:58:22 CET 2019	Agt1 Bromeliaceae BLAST		0	true	99.6%
			BE240_Aechmea_araneosa	0	892	2	97.1%	97.8%	50.1%	763787	Wed Jan 23 09:58:22 CET 2019	Agt1 Bromeliaceae BLAST		0	true	98.9%
Hohenbergia subgen Canistrum Aechmea South Bahia group			BE034_Aechmea_floribunda	0	895	2	97.1%	97.6%	49.7%	760093	Wed Jan 23 09:58:22 CET 2019	Agt1 Bromeliaceae BLAST		0	true	98.8%
Heller 2018			BE358_Hohenbergia_stellata	0	895	2	96.7%	97.2%	49.1%	752707	Wed Jan 23 09:58:22 CET 2019	Agt1 Bromeliaceae BLAST		0	true	98.6%
			BE564_Hohenbergia_rosea	0	894	2	96.7%	97.1%	49.8%	750.86	Wed Jan 23 09:58:22 CET 2019	Agt1 Bromeliaceae BLAST		0	true	98.6%
			BE319_Hohenbergia_augusta	0	895	2	96.7%	97.1%	50.1%	750.86	Wed Jan 23 09:58:22 CET 2019	Agt1 Bromeliaceae BLAST		0	true	98.6%
			BE233_Hohenbergia_stellata	0	894	2	96.7%	97.1%	49.8%	750.86	Wed Jan 23 09:58:22 CET 2019	Agt1 Bromeliaceae BLAST		0	true	98.6%
			BE229_Hohenbergia_loredanoana	0	898	2	96.2%	97.1%	49.7%	750.86	Wed Jan 23 09:58:22 CET 2019	Agt1 Bromeliaceae BLAST		0	true	98.6%
			BE047_Aechmea_ramosa	0	895	2	96.7%	97.1%	50.3%	750.86	Wed Jan 23 09:58:22 CET 2019	Agt1 Bromeliaceae BLAST		0	true	98.6%
			BE222_Hohenbergia_edmundoi	0	892	2	96.7%	97.1%	49.7%	749013	Wed Jan 23 09:58:22 CET 2019	Agt1 Bromeliaceae BLAST		0	true	98.4%
			BE523_Hohenbergia_burle-marxii	0	894	2	96.4%	97.0%	50.1%	747167	Wed Jan 23 09:58:22 CET 2019	Agt1 Bromeliaceae BLAST		0	true	98.5%
			BE357_Hohenbergia_pennae	0	893	2	96.4%	97.1%	49.3%	747167	Wed Jan 23 09:58:22 CET 2019	Agt1 Bromeliaceae BLAST		0	true	98.5%
			MegaBLAST results - only first 10 hits shown	# Nucleotide Sequences With Mates	# Nucleotides	# Sequences	% Identical Sites	% Pairwise Identity	%GC	Bit-Score	Created Date	Database	Description	E Value	Free end gaps	Grade
		BE587_Neoregelia_myrmecophila	BE587_Neoregelia_myrmecophila	0	898	2	100.0%	99.1%	50.3%	800.72	Wed Jan 23 09:58:49 CET 2019	Agt1 Bromeliaceae BLAST		0	true	99.6%
			BE597_Neoregelia_myrmecophila	0	898	2	97.1%	98.0%	50.6%	773.02	Wed Jan 23 09:58:49 CET 2019	Agt1 Bromeliaceae BLAST		0	true	99.0%
			BE131_Neoregelia_margaretae	0	896	2	96.9%	97.8%	50.0%	765633	Wed Jan 23 09:58:49 CET 2019	Agt1 Bromeliaceae BLAST		0	true	98.8%
Neoregelia subgen Hylaeaicum group			BE627_Neoregelia_eleutheropetala	0	881	2	96.6%	97.5%	50.9%	741627	Wed Jan 23 09:58:49 CET 2019	Agt1 Bromeliaceae BLAST		0	true	97.9%
Heller 2018			BE041_Aechmea_chantinii	0	917	2	89.0%	89.7%	48.3%	571735	Wed Jan 23 09:58:49 CET 2019	Agt1 Bromeliaceae BLAST		8.55e-165	true	94.9%
			BE343_Aechmea_muricata	0	907	2	88.9%	89.7%	47.3%	568042	Wed Jan 23 09:58:49 CET 2019	Agt1 Bromeliaceae BLAST		1.11e-163	true	94.7%
			BE060_Quesnelia_testudo	0	915	2	88.5%	89.2%	46.9%	558808	Wed Jan 23 09:58:49 CET 2019	Agt1 Bromeliaceae BLAST		6.65e-161	true	94.6%
			BE072_Quesnelia_conquistensis	0	915	2	88.3%	88.9%	47.2%	551422	Wed Jan 23 09:58:49 CET 2019	Agt1 Bromeliaceae BLAST		1.11e-158	true	94.5%
			BE422_Aechmea_smithiorum_var_longipitata	0	919	2	87.9%	88.6%	47.0%	544035	Wed Jan 23 09:58:49 CET 2019	Agt1 Bromeliaceae BLAST		1.86e-156	true	94.3%
			BE640_Sincoraea_burle-marxii	0	906	2	87.2%	88.4%	48.9%	531109	Wed Jan 23 09:58:49 CET 2019	Agt1 Bromeliaceae BLAST		1.45e-152	true	94.2%
			MegaBLAST results - only first 10 hits shown	# Nucleotide Sequences With Mates	# Nucleotides	# Sequences	% Identical Sites	% Pairwise Identity	%GC	Bit-Score	Created Date	Database	Description	E Value	Free end gaps	Grade
		BE636_Ronnbergia_silvana	BE636_Ronnbergia_silvana	0	1004	2	100.0%	100.0%	47.2%	928138	Wed Jan 23 10:00:05 CET 2019	Agt1 Bromeliaceae BLAST		0	true	100.0%
			BE231_Ronnbergia_silvana	0	1004	2	99.6%	99.6%	47.0%	917059	Wed Jan 23 10:00:05 CET 2019	Agt1 Bromeliaceae BLAST		0	true	99.8%
			BE392_Wittmackia_amorimii	0	993	2	96.8%	96.8%	47.3%	828419	Wed Jan 23 10:00:05 CET 2019	Agt1 Bromeliaceae BLAST		0	true	98.4%
Wittmackia Ronnbergia group			BE548_Wittmackia_ituberaensis	0	993	2	96.6%	96.6%	47.7%	822879	Wed Jan 23 10:00:05 CET 2019	Agt1 Bromeliaceae BLAST		0	true	98.3%
Heller 2018			BE531_Aechmea_hoppii	0	998	2	96.2%	96.3%	47.0%	819186	Wed Jan 23 10:00:05 CET 2019	Agt1 Bromeliaceae BLAST		0	true	98.2%
			BE521_Wittmackia_tentaculifera	0	993	2	96.2%	96.3%	48.0%	813646	Wed Jan 23 10:00:05 CET 2019	Agt1 Bromeliaceae BLAST		0	true	98.2%
			BE386_Wittmackia_incompta	0	993	2	96.2%	96.2%	47.5%	811799	Wed Jan 23 10:00:05 CET 2019	Agt1 Bromeliaceae BLAST		0	true	98.1%
			BE449_Aechmea_hoppii	0	998	2	95.6%	96.1%	47.4%	809953	Wed Jan 23 10:00:05 CET 2019	Agt1 Bromeliaceae BLAST		0	true	98.1%
			BE415_Wittmackia_lingulatoides	0	993	2	96.0%	96.0%	47.3%	806.26	Wed Jan 23 10:00:05 CET 2019	Agt1 Bromeliaceae BLAST		0	true	98.0%
			BE401_Wittmackia_turbinocalyx	0	993	2	96.0%	96.0%	47.5%	806.26	Wed Jan 23 10:00:05 CET 2019	Agt1 Bromeliaceae BLAST		0	true	98.0%
			MegaBLAST results - only first 10 hits shown	# Nucleotide Sequences With Mates	# Nucleotides	# Sequences	% Identical Sites	% Pairwise Identity	%GC	Bit-Score	Created Date	Database	Description	E Value	Free end gaps	Grade
		BE677_Orthophytum_duartei	BE677_Orthophytum_duartei	0	928	2	100.0%	100.0%	49.8%	857966	Wed Jan 23 10:00:50 CET 2019	Agt1 Bromeliaceae BLAST		0	true	100.0%
			BE692_Orthophytum_duartei	0	908	2	100.0%	100.0%	49.6%	839499	Wed Jan 23 10:00:50 CET 2019	Agt1 Bromeliaceae BLAST		0	true	98.9%
			BE492_Orthophytum_vagans	0	933	2	93.4%	93.4%	49.9%	689921	Wed Jan 23 10:00:50 CET 2019	Agt1 Bromeliaceae BLAST		0	true	96.7%
Cryptanthoid group			BE644_Orthophytum_zanonii	0	933	2	93.0%	93.3%	50.2%	684381	Wed Jan 23 10:00:50 CET 2019	Agt1 Bromeliaceae BLAST		0	true	96.7%
Heller 2018			BE680_Orthophytum_pseudovagans	0	873	2	93.0%	93.0%	49.7%	634521	Wed Jan 23 10:00:50 CET 2019	Agt1 Bromeliaceae BLAST		0	true	93.3%
			BE691_Forzzaea_leopoldo-horstii	0	809	2	93.4%	93.4%	46.5%	597588	Wed Jan 23 10:00:50 CET 2019	Agt1 Bromeliaceae BLAST		1.46e-172	true	90.3%
			BE633_Lapanthus_itambensis	0	806	2	92.4%	92.8%	46.5%	579122	Wed Jan 23 10:00:50 CET 2019	Agt1 Bromeliaceae BLAST		5.29e-167	true	89.7%
			BE632_Lapanthus_duartei	0	806	2	92.4%	92.6%	46.8%	577275	Wed Jan 23 10:00:50 CET 2019	Agt1 Bromeliaceae BLAST		1.90e-166	true	89.6%
			BE500_Ananas_ananassioides	0	798	2	92.8%	92.8%	47.3%	577275	Wed Jan 23 10:00:50 CET 2019	Agt1 Bromeliaceae BLAST		1.90e-166	true	90.1%
			BE495_Ananas_comosus	0	798	2	92.8%	92.8%	47.1%	577275	Wed Jan 23 10:00:50 CET 2019	Agt1 Bromeliaceae BLAST		1.90e-166	true	90.1%
			MegaBLAST results - only first 10 hits shown	# Nucleotide Sequences With Mates	# Nucleotides	# Sequences	% Identical Sites	% Pairwise Identity	%GC	Bit-Score	Created Date	Database	Description	E Value	Free end gaps	Grade
		BE683_Orthophytum_roseolilacinum	BE683_Orthophytum_roseolilacinum	0	994	2	100.0%	100.0%	49.1%	918905	Wed Jan 23 10:01:18 CET 2019	Agt1 Bromeliaceae BLAST		0	true	100.0%
			BE693_Orthophytum_roseolilacinum	0	975	2	99.4%	99.4%	48.4%	883819	Wed Jan 23 10:01:18 CET 2019	Agt1 Bromeliaceae BLAST		0	true	98.7%
			BE492_Orthophytum_vagans	0	825	2	93.8%	93.8%	49.1%	617901	Wed Jan 23 10:01:18 CET 2019	Agt1 Bromeliaceae BLAST		1.20e-178	true	89.0%
			BE644_Orthophytum_zanonii	0	825	2	93.4%	93.6%	49.1%	610515	Wed Jan 23 10:01:18 CET 2019	Agt1 Bromeliaceae BLAST		2.01e-176	true	88.9%
Cryptanthoid group			BE691_Forzzaea_leopoldo-horstii	0	982	2	89.3%	89.3%	46.8%	608668	Wed Jan 23 10:01:18 CET 2019	Agt1 Bromeliaceae BLAST		7.24e-176	true	94.7%
Heller 2018			BE680_Orthophytum_pseudovagans	0	813	2	93.3%	93.3%	48.9%	595741	Wed Jan 23 10:01:18 CET 2019	Agt1 Bromeliaceae BLAST		5.64e-172	true	88.1%
			BE633_Lapanthus_itambensis	0	985	2	88.6%	88.8%	46.4%	592048	Wed Jan 23 10:01:18 CET 2019	Agt1 Bromeliaceae BLAST		7.29e-171	true	94.4%
			BE632_Lapanthus_duartei	0	985	2	88.4%	88.6%	46.7%	586508	Wed Jan 23 10:01:18 CET 2019	Agt1 Bromeliaceae BLAST		3.39e-169	true	94.3%
			BE692_Orthophytum_duartei	0	690	2	95.1%	95.1%	50.1%	544035	Wed Jan 23 10:01:18 CET 2019	Agt1 Bromeliaceae BLAST		2.07e-156	true	82.3%
			BE677_Orthophytum_duartei	0	690	2	95.1%	95.1%	50.1%	544035	Wed Jan 23 10:01:18 CET 2019	Agt1 Bromeliaceae BLAST		2.07e-156	true	82.3%
			MegaBLAST results - only first 10 hits shown	# Nucleotide Sequences With Mates	# Nucleotides	# Sequences	% Identical Sites	% Pairwise Identity	%GC	Bit-Score	Created Date	Database	Description	E Value	Free end gaps	Grade
		BRC089_Hechtia guatemalensis	BRC089_Hechtia guatemalensis	0	820	2	100.0%	100.0%	45.9%	758247	Wed Jan 23 10:07:21 CET 2019	Agt1 Bromeliaceae BLAST	2 reads from FB_BRC089_AGT1 assembled using Geneious	0	true	100.0%
			BRC023_Hechtia guatemalensis	0	692	2	97.4%	97.4%	47.1%	590202	Wed Jan 23 10:07:21 CET 2019	Agt1 Bromeliaceae BLAST	2 reads from FB_BRC023_AGT1 assembled using Geneious	2.15e-170	true	90.9%
			BRC098_Pitcairnia wendlandii	0	695	2	93.4%	93.4%	49.1%	514489	Wed Jan 23 10:07:21 CET 2019	Agt1 Bromeliaceae BLAST	2 reads from FB_BRC098_AGT1 assembled using Geneious	1.33e-147	true	89.0%
			BRC378_Navia saxicola	0	661	2	94.6%	94.7%	47.0%	512642	Wed Jan 23 10:07:21 CET 2019	Agt1 Bromeliaceae BLAST	2 reads from FB_BRC_378 assembled using Geneious	4.78e-147	true	87.7%
			BRC271_Racinaea multiflora	0	675	2	93.8%	94.0%	47.3%	508949	Wed Jan 23 10:07:21 CET 2019	Agt1 Bromeliaceae BLAST	2 reads from FB_BRC271_AGT1 assembled using Geneious	6.18e-146	true	88.0%
			BRC141_Guzmania variegata	0	703	2	92.7%	92.7%	46.7%	505256	Wed Jan 23 10:07:21 CET 2019	Agt1 Bromeliaceae BLAST	2 reads from FB_BRC141 assembled using Geneious	8.00e-145	true	89.0%
			BRC376_Brewcaria reflexa	0	662	2	94.0%	94.0%	48.2%	501562	Wed Jan 23 10:07:21 CET 2019	Agt1 Bromeliaceae BLAST	2 reads from FB_BRC_376 assembled using Geneious	1.03e-143	true	87.5%
			BRC122_Pitcairnia elliptica	0	681	2	93.3%	93.3%	48.1%	501562	Wed Jan 23 10:07:21 CET 2019	Agt1 Bromeliaceae BLAST	2 reads from FB_BRC122_AGT1 assembled using Geneious	1.03e-143	true	88.1%
			BRC113_Picairnia nigra	0	681	2	93.3%	93.3%	49.3%	501562	Wed Jan 23 10:07:21 CET 2019	Agt1 Bromeliaceae BLAST	2 reads from FB_BRC113_AGT1 assembled using Geneious	1.03e-143	true	88.1%
			BRC357.1_Tillandsia caloura_pJET12rev.ab1 extraction	0	624	2	95.5%	95.5%	48.4%	499716	Wed Jan 23 10:07:21 CET 2019	Agt1 Bromeliaceae BLAST		3.72e-143	true	85.8%
			MegaBLAST results - only first 10 hits shown	# Nucleotide Sequences With Mates	# Nucleotides	# Sequences	% Identical Sites	% Pairwise Identity	%GC	Bit-Score	Created Date	Database	Description	E Value	Free end gaps	Grade
		BRC098_Pitcairnia wendlandii	BRC098_Pitcairnia wendlandii	0	918	2	100.0%	100.0%	43.6%	848732	Wed Jan 23 10:07:37 CET 2019	Agt1 Bromeliaceae BLAST	2 reads from FB_BRC098_AGT1 assembled using Geneious	0	true	100.0%
			BRC070_Pitcairnia wendlandii	0	884	2	99.8%	99.8%	42.8%	811799	Wed Jan 23 10:07:37 CET 2019	Agt1 Bromeliaceae BLAST	2 reads from FB_BRC070 assembled using Geneious	0	true	98.0%
			BRC113_Picairnia nigra	0	905	2	98.0%	98.0%	43.7%	785946	Wed Jan 23 10:07:37 CET 2019	Agt1 Bromeliaceae BLAST	2 reads from FB_BRC113_AGT1 assembled using Geneious	0	true	98.2%
Pitcairnioideae			BRC103_Pitcairnia atrorubens	0	830	2	100.0%	100.0%	42.2%	767.48	Wed Jan 23 10:07:37 CET 2019	Agt1 Bromeliaceae BLAST	3 reads from FB_BRC103 assembled using Geneious	0	true	95.2%
			BRC115_Pitcairnia rexiflora	0	903	2	96.9%	96.9%	44.1%	756.4	Wed Jan 23 10:07:37 CET 2019	Agt1 Bromeliaceae BLAST	2 reads from FB_BRC115_AGT1 assembled using Geneious	0	true	97.7%
			BRC122_Pitcairnia elliptica	0	903	2	96.5%	96.6%	43.3%	747167	Wed Jan 23 10:07:37 CET 2019	Agt1 Bromeliaceae BLAST	2 reads from FB_BRC122_AGT1 assembled using Geneious	0	true	97.5%
			BRC119_Pitcairnia elvirae	0	888	2	96.4%	96.4%	42.7%	732394	Wed Jan 23 10:07:37 CET 2019	Agt1 Bromeliaceae BLAST	2 reads from FB_BRC_119 assembled using Geneious	0	true	96.7%
			BRC032_Pitcairnia corallina	0	912	2	95.4%	95.5%	43.8%	728.7	Wed Jan 23 10:07:37 CET 2019	Agt1 Bromeliaceae BLAST	2 reads from FB_BRC032_AGT1 assembled using Geneious	0	true	97.5%
			BRC116_Pitcairnia recurvata	0	844	2	96.0%	96.0%	41.9%	686227	Wed Jan 23 10:07:37 CET 2019	Agt1 Bromeliaceae BLAST	2 reads from FB_BRC116 assembled using Geneious	0	true	94.0%
			BRC136_Pitcairnia roseoalba	0	843	2	96.0%	96.0%	42.3%	684381	Wed Jan 23 10:07:37 CET 2019	Agt1 Bromeliaceae BLAST	2 reads from 2 documents assembled using Geneious	0	true	94.0%
			MegaBLAST results - only first 10 hits shown	# Nucleotide Sequences With Mates	# Nucleotides	# Sequences	% Identical Sites	% Pairwise Identity	%GC	Bit-Score	Created Date	Database	Description	E Value	Free end gaps	Grade
		BRC305_Tillandsia ionantha	BRC305_Tillandsia ionantha	0	1068	2	100.0%	99.9%	43.1%	983538	Wed Jan 23 10:07:54 CET 2019	Agt1 Bromeliaceae BLAST	2 reads from BRC305_FB047 assembled using Geneious	0	true	100.0%
			BRC404_Tillandsia ionantha	0	1046	2	99.4%	99.5%	42.4%	952145	Wed Jan 23 10:07:54 CET 2019	Agt1 Bromeliaceae BLAST	2 reads from FB_BRC404 assembled using Geneious	0	true	98.7%
			BRC408_Tillandsia ionantha	0	1061	2	96.1%	96.2%	42.4%	865352	Wed Jan 23 10:07:54 CET 2019	Agt1 Bromeliaceae BLAST	2 reads from FB_BRC408 assembled using Geneious	0	true	97.1%
			BRC434_Tillandsia ionantha	0	1057	2	95.7%	95.8%	42.5%	850579	Wed Jan 23 10:07:54 CET 2019	Agt1 Bromeliaceae BLAST	2 reads from FB_BRC434 assembled using Geneious	0	true	96.9%
			BRC437_Tillandsia inonantha	0	1029	2	96.4%	96.5%	42.3%	846886	Wed Jan 23 10:07:54 CET 2019	Agt1 Bromeliaceae BLAST	2 reads from FB_437 assembled using Geneious	0	true	95.7%
			BRC406_Tillandsia ionantha	0	1057	2	95.2%	95.3%	42.1%	833959	Wed Jan 23 10:07:54 CET 2019	Agt1 Bromeliaceae BLAST	2 reads from FB_BRC406 assembled using Geneious	0	true	96.6%
			BRC387_Tillandsia delicata	0	1054	2	94.8%	94.9%	42.2%	821033	Wed Jan 23 10:07:54 CET 2019	Agt1 Bromeliaceae BLAST	2 reads from FB_BRC387 assembled using Geneious	0	true	96.4%
			BRC236_Tillandsia guerreroensis	0	1054	2	94.4%	94.5%	42.2%	809953	Wed Jan 23 10:07:54 CET 2019	Agt1 Bromeliaceae BLAST	2 reads from FB_BRC_236 assembled using Geneious	0	true	96.2%
			BRC248_Tillandsia capitata	0	1054	2	94.2%	94.5%	42.2%	808106	Wed Jan 23 10:07:54 CET 2019	Agt1 Bromeliaceae BLAST	2 reads from FB_BRC_248 assembled using Geneious	0	true	96.2%
			BRC311_Tillandsia tricolor	0	1054	2	94.2%	94.3%	41.8%	804413	Wed Jan 23 10:07:54 CET 2019	Agt1 Bromeliaceae BLAST	2 reads from FB_BRC311 assembled using Geneious	0	true	96.1%
			MegaBLAST results - only first 10 hits shown	# Nucleotide Sequences With Mates	# Nucleotides	# Sequences	% Identical Sites	% Pairwise Identity	%GC	Bit-Score	Created Date	Database	Description	E Value	Free end gaps	Grade
		BRC420_Tillandsia capillaris	BRC420_Tillandsia capillaris	0	1114	2	100.0%	99.9%	40.8%	1026.01	Wed Jan 23 10:09:13 CET 2019	Agt1 Bromeliaceae BLAST	2 reads from FB_BRC420 assembled using Geneious	0	true	100.0%
			BRC424_Tillandsia capillaris	0	1086	2	99.6%	99.7%	41.1%	994618	Wed Jan 23 10:09:13 CET 2019	Agt1 Bromeliaceae BLAST	2 reads from FB_BRC424 assembled using Geneious	0	true	98.6%
			BRC298_Tillandsia capillaris	0	1080	2	100.0%	99.9%	40.8%	994618	Wed Jan 23 10:09:13 CET 2019	Agt1 Bromeliaceae BLAST	2 reads from 2 documents assembled using Geneious	0	true	98.4%
			BRC385_Tillandsia landbeckii	0	1110	2	98.7%	98.8%	40.9%	989078	Wed Jan 23 10:09:13 CET 2019	Agt1 Bromeliaceae BLAST	2 reads from FB_BRC385 assembled using Geneious	0	true	99.4%
Tillandsia subgen Diaphoranthema			BRC384_Tillandsia landbeckii	0	1110	2	98.7%	98.8%	40.9%	989078	Wed Jan 23 10:09:13 CET 2019	Agt1 Bromeliaceae BLAST	2 reads from FB_BRC384 assembled using Geneious	0	true	99.4%
Barfuss et al. 2016			BRC224_Tillandsia mollis	0	1110	2	98.7%	98.8%	40.9%	989078	Wed Jan 23 10:09:13 CET 2019	Agt1 Bromeliaceae BLAST	2 reads from FB_BRC224 assembled using Geneious	0	true	99.4%
			BRC383_Tillandsia landbeckii	0	1096	2	98.7%	98.8%	40.8%	976151	Wed Jan 23 10:09:13 CET 2019	Agt1 Bromeliaceae BLAST	2 reads from FB_BRC383 assembled using Geneious	0	true	98.8%
			BRC396_Tillandsia usneoides	0	1111	2	98.2%	98.3%	40.4%	972458	Wed Jan 23 10:09:14 CET 2019	Agt1 Bromeliaceae BLAST	2 reads from FB_BRC396 assembled using Geneious	0	true	99.1%
			BRC403_Tillandsia usneoides	0	1090	2	98.7%	98.8%	41.1%	970611	Wed Jan 23 10:09:14 CET 2019	Agt1 Bromeliaceae BLAST	2 reads from FB_BRC403 assembled using Geneious	0	true	98.5%
			BRC382_Tillandsia landbeckii	0	1080	2	98.7%	98.8%	40.9%	961378	Wed Jan 23 10:09:14 CET 2019	Agt1 Bromeliaceae BLAST	2 reads from FB_BRC382 assembled using Geneious	0	true	98.1%
			MegaBLAST results - only first 10 hits shown	# Nucleotide Sequences With Mates	# Nucleotides	# Sequences	% Identical Sites	% Pairwise Identity	%GC	Bit-Score	Created Date	Database	Description	E Value	Free end gaps	Grade
		BRC441_Tillandsia distichia	BRC441_Tillandsia distichia	0	990	2	100.0%	100.0%	41.0%	915212	Wed Jan 23 10:09:30 CET 2019	Agt1 Bromeliaceae BLAST	2 reads from FB_441 assembled using Geneious	0	true	100.0%
			BRC445_Tillandsia distichia	0	990	2	99.6%	99.6%	41.0%	904132	Wed Jan 23 10:09:30 CET 2019	Agt1 Bromeliaceae BLAST	2 reads from FB_BRC445 assembled using Geneious	0	true	99.8%
			BRC446_Tillandsia distichia	0	990	2	99.4%	99.5%	40.9%	900439	Wed Jan 23 10:09:31 CET 2019	Agt1 Bromeliaceae BLAST	2 reads from FB_BRC446 assembled using Geneious	0	true	99.7%
			BRC444_Tillandsia distichia	0	990	2	99.4%	99.5%	41.0%	900439	Wed Jan 23 10:09:31 CET 2019	Agt1 Bromeliaceae BLAST	2 reads from FB_444 assembled using Geneious	0	true	99.7%
			BRC448_Tillandsia distichia	0	984	2	99.4%	99.4%	41.1%	893052	Wed Jan 23 10:09:31 CET 2019	Agt1 Bromeliaceae BLAST	2 reads from FB_448 assembled using Geneious	0	true	99.4%
			BRC326_Tillandsia distichia	0	991	2	99.2%	99.2%	41.1%	893052	Wed Jan 23 10:09:31 CET 2019	Agt1 Bromeliaceae BLAST	2 reads from FB_BRC326 assembled using Geneious	0	true	99.6%
			BRC442_Tillandsia distichia	0	990	2	98.6%	98.6%	40.8%	876432	Wed Jan 23 10:09:31 CET 2019	Agt1 Bromeliaceae BLAST	2 reads from FB_BRC442 assembled using Geneious	0	true	99.3%
			BRC440_Tillandsia distichia	0	990	2	98.6%	98.6%	40.8%	876432	Wed Jan 23 10:09:31 CET 2019	Agt1 Bromeliaceae BLAST	2 reads from FB_BRC440 assembled using Geneious	0	true	99.3%
			BRC254_Tillandsia esseriana	0	983	2	95.2%	95.2%	41.6%	774866	Wed Jan 23 10:09:31 CET 2019	Agt1 Bromeliaceae BLAST	2 reads from FB_BRC_254 assembled using Geneious	0	true	97.6%
			BRC170_Tillandsia fendleri	0	984	2	94.9%	95.1%	41.9%	773.02	Wed Jan 23 10:09:31 CET 2019	Agt1 Bromeliaceae BLAST	2 reads from FB_BRC170 assembled using Geneious	0	true	97.5%
			MegaBLAST results - only first 10 hits shown	# Nucleotide Sequences With Mates	# Nucleotides	# Sequences	% Identical Sites	% Pairwise Identity	%GC	Bit-Score	Created Date	Database	Description	E Value	Free end gaps	Grade
		BE101_Aechmea_aquilega	BE101_Aechmea_aquilega	0	886	2	100.0%	100.0%	49.0%	819186	Mon Sep 09 14:17:11 CEST 2019	Agt1 Bromeliaceae BLAST		0	true	100.0%
			BE090_Aechmea_guainumbiorum	0	886	2	98.6%	99.1%	49.4%	793333	Mon Sep 09 14:17:11 CEST 2019	Agt1 Bromeliaceae BLAST		0	true	99.5%
			BE070_Canistrum_aurantiacum	0	887	2	98.6%	98.6%	49.2%	785946	Mon Sep 09 14:17:11 CEST 2019	Agt1 Bromeliaceae BLAST		0	true	99.3%
			BE082_Aechmea_cephaloides	0	879	2	98.6%	98.9%	49.4%	782253	Mon Sep 09 14:17:11 CEST 2019	Agt1 Bromeliaceae BLAST		0	true	99.0%
Gravisia clade			BE393_Aechmea_blanchetiana	0	886	2	98.4%	98.4%	49.3%	780406	Mon Sep 09 14:17:11 CEST 2019	Agt1 Bromeliaceae BLAST		0	true	99.2%
Heller 2018			BE243_Aechmea_leptantha	0	886	2	98.4%	98.4%	48.6%	780406	Mon Sep 09 14:17:11 CEST 2019	Agt1 Bromeliaceae BLAST		0	true	99.2%
			BE176_Aechmea_eurycorymbus	0	887	2	98.4%	98.4%	49.5%	780406	Mon Sep 09 14:17:11 CEST 2019	Agt1 Bromeliaceae BLAST		0	true	99.2%
			BE073_Canistrum_alagoanum	0	887	2	98.2%	98.5%	49.5%	780406	Mon Sep 09 14:17:11 CEST 2019	Agt1 Bromeliaceae BLAST		0	true	99.3%
			BB113_Aechmea_chrysocoma	0	886	2	98.4%	98.4%	49.3%	780406	Mon Sep 09 14:17:11 CEST 2019	Agt1 Bromeliaceae BLAST		0	true	99.2%
			BE064_Aechmea_rubrolilacina	0	890	2	98.2%	98.2%	49.7%	778.56	Mon Sep 09 14:17:11 CEST 2019	Agt1 Bromeliaceae BLAST		0	true	99.1%
			MegaBLAST results - only first 10 hits shown	# Nucleotide Sequences With Mates	# Nucleotides	# Sequences	% Identical Sites	% Pairwise Identity	%GC	Bit-Score	Created Date	Database	Description	E Value	Free end gaps	Grade
		BE127_Aechmea_marauensis	BE141_Aechmea_guaratingensis	0	896	2	98.4%	99.2%	50.2%	802566	Wed Jan 23 09:41:20 CET 2019	Agt1 Bromeliaceae BLAST		0	true	99.6%
			BE127_Aechmea_marauensis	0	896	2	100.0%	99.2%	50.1%	802566	Wed Jan 23 09:41:20 CET 2019	Agt1 Bromeliaceae BLAST		0	true	99.6%
			BE064_Aechmea_rubrolilacina	0	894	2	98.4%	99.2%	49.7%	800.72	Wed Jan 23 09:41:20 CET 2019	Agt1 Bromeliaceae BLAST		0	true	99.5%
			BE419_Portea_fosteriana	0	896	2	98.7%	99.1%	49.9%	798873	Wed Jan 23 09:41:20 CET 2019	Agt1 Bromeliaceae BLAST		0	true	99.6%
Portea group			BE391_Aechmea_marauensis	0	896	2	98.2%	99.1%	50.0%	798873	Wed Jan 23 09:41:20 CET 2019	Agt1 Bromeliaceae BLAST		0	true	99.6%
Heller 2018			BE052_Aechmea_bahiana	0	896	2	98.4%	99.1%	50.0%	798873	Wed Jan 23 09:41:20 CET 2019	Agt1 Bromeliaceae BLAST		0	true	99.6%
			BE413_Portea_filifera	0	896	2	98.2%	99.0%	49.8%	797026	Wed Jan 23 09:41:20 CET 2019	Agt1 Bromeliaceae BLAST		0	true	99.5%
			BE249_Aechmea_amicorum	0	896	2	98.2%	99.0%	49.8%	797026	Wed Jan 23 09:41:20 CET 2019	Agt1 Bromeliaceae BLAST		0	true	99.5%
			BE096_Portea_silveirae	0	896	2	98.7%	99.0%	50.2%	797026	Wed Jan 23 09:41:20 CET 2019	Agt1 Bromeliaceae BLAST		0	true	99.5%
			BE091_Aechmea_discordiae	0	896	2	98.2%	99.0%	50.0%	797026	Wed Jan 23 09:41:20 CET 2019	Agt1 Bromeliaceae BLAST		0	true	99.5%
			MegaBLAST results - only first 10 hits shown	# Nucleotide Sequences With Mates	# Nucleotides	# Sequences	% Identical Sites	% Pairwise Identity	%GC	Bit-Score	Created Date	Database	Description	E Value	Free end gaps	Grade
		BE174_Aechmea_nudicaulis	BE174_Aechmea_nudicaulis	0	1008	2	100.0%	99.8%	47.6%	924445	Wed Jan 23 09:42:23 CET 2019	Agt1 Bromeliaceae BLAST		0	true	99.9%
			BE374_Aechmea_phanerophlebia	0	1008	2	98.8%	99.1%	47.1%	904132	Wed Jan 23 09:42:23 CET 2019	Agt1 Bromeliaceae BLAST		0	true	99.6%
			BE279_Aechmea_nudicaulis	0	1007	2	98.6%	98.8%	47.3%	894899	Wed Jan 23 09:42:24 CET 2019	Agt1 Bromeliaceae BLAST		0	true	99.4%
			BRC428_Aechmea nudicaulis	0	997	2	98.0%	98.2%	47.4%	869046	Wed Jan 23 09:42:24 CET 2019	Agt1 Bromeliaceae BLAST	2 reads from FB_BRC428 assembled using Geneious	0	true	98.4%
			BRC393_Aechmea nudicaulis	0	999	2	97.6%	97.8%	47.3%	859812	Wed Jan 23 09:42:24 CET 2019	Agt1 Bromeliaceae BLAST	2 reads from FB_BRC393 assembled using Geneious	0	true	98.3%
			BE533_Quesnelia_kautskyi	0	1002	2	97.2%	97.4%	47.4%	852426	Wed Jan 23 09:42:24 CET 2019	Agt1 Bromeliaceae BLAST		0	true	98.7%
			BE168_Aechmea_phanerophlebia	0	1008	2	97.0%	97.2%	47.2%	852426	Wed Jan 23 09:42:25 CET 2019	Agt1 Bromeliaceae BLAST		0	true	98.6%
			BE287_Aechmea_bocainensis	0	1001	2	96.6%	97.2%	47.3%	841346	Wed Jan 23 09:42:25 CET 2019	Agt1 Bromeliaceae BLAST		0	true	98.6%
			BE400_Aechmea_triticina	0	1002	2	96.6%	96.9%	47.5%	837653	Wed Jan 23 09:42:25 CET 2019	Agt1 Bromeliaceae BLAST		0	true	98.5%
			BE318_Aechmea_flavorosea	0	1004	2	96.6%	96.8%	47.8%	837653	Wed Jan 23 09:42:25 CET 2019	Agt1 Bromeliaceae BLAST		0	true	98.4%
			MegaBLAST results - only first 10 hits shown	# Nucleotide Sequences With Mates	# Nucleotides	# Sequences	% Identical Sites	% Pairwise Identity	%GC	Bit-Score	Created Date	Database	Description	E Value	Free end gaps	Grade
		BE233_Hohenbergia_stellata	BE233_Hohenbergia_stellata	0	892	2	100.0%	100.0%	49.8%	824726	Wed Jan 23 09:43:01 CET 2019	Agt1 Bromeliaceae BLAST		0	true	100.0%
			BE564_Hohenbergia_rosea	0	892	2	99.6%	99.6%	49.8%	813646	Wed Jan 23 09:43:01 CET 2019	Agt1 Bromeliaceae BLAST		0	true	99.8%
			BE222_Hohenbergia_edmundoi	0	890	2	99.6%	99.6%	49.7%	811799	Wed Jan 23 09:43:01 CET 2019	Agt1 Bromeliaceae BLAST		0	true	99.7%
			BE081_Canistrum_guzmanioides	0	890	2	99.3%	99.7%	49.5%	811799	Wed Jan 23 09:43:01 CET 2019	Agt1 Bromeliaceae BLAST		0	true	99.7%
Hohenbergia subgen Canistrum Aechme South Bahia group			BE382_Hohenbergia_belemii	0	892	2	98.9%	99.3%	49.7%	804413	Wed Jan 23 09:43:01 CET 2019	Agt1 Bromeliaceae BLAST		0	true	99.7%
Heller 2018			BE358_Hohenbergia_stellata	0	893	2	99.1%	99.2%	49.1%	804413	Wed Jan 23 09:43:01 CET 2019	Agt1 Bromeliaceae BLAST		0	true	99.6%
			BB056_Hohenbergia_catingae	0	892	2	98.9%	99.2%	49.5%	802566	Wed Jan 23 09:43:01 CET 2019	Agt1 Bromeliaceae BLAST		0	true	99.6%
			BE523_Hohenbergia_burle-marxii	0	892	2	98.9%	99.0%	50.1%	798873	Wed Jan 23 09:43:01 CET 2019	Agt1 Bromeliaceae BLAST		0	true	99.5%
			BE186_Aechmea_echinata	0	892	2	98.7%	99.1%	49.8%	798873	Wed Jan 23 09:43:01 CET 2019	Agt1 Bromeliaceae BLAST		0	true	99.6%
			BE505_Aechmea_weberi	0	892	2	98.4%	99.1%	49.4%	797026	Wed Jan 23 09:43:01 CET 2019	Agt1 Bromeliaceae BLAST		0	true	99.6%
			MegaBLAST results - only first 10 hits shown	# Nucleotide Sequences With Mates	# Nucleotides	# Sequences	% Identical Sites	% Pairwise Identity	%GC	Bit-Score	Created Date	Database	Description	E Value	Free end gaps	Grade
		BE377_Billbergia_elegans	BE377_Billbergia_elegans	0	910	2	100.0%	99.8%	48.9%	833959	Wed Jan 23 09:44:49 CET 2019	Agt1 Bromeliaceae BLAST		0	true	99.9%
			BE584_Billbergia_horrida	0	910	2	98.7%	99.1%	48.7%	815493	Wed Jan 23 09:44:49 CET 2019	Agt1 Bromeliaceae BLAST		0	true	99.6%
			BE429_Billbergia_elegans	0	910	2	98.7%	98.9%	48.6%	811799	Wed Jan 23 09:44:49 CET 2019	Agt1 Bromeliaceae BLAST		0	true	99.5%
Billbergia_Quesnelia_subgen_Billbergiopsis_Aechmea_subgen_Aechmea_group			BE376_Billbergia_nana	0	914	2	98.5%	98.8%	48.5%	811799	Wed Jan 23 09:44:49 CET 2019	Agt1 Bromeliaceae BLAST		0	true	99.4%
Heller 2018			BE234_Billbergia_distachia	0	911	2	98.5%	98.7%	49.1%	806.26	Wed Jan 23 09:44:49 CET 2019	Agt1 Bromeliaceae BLAST		0	true	99.3%
			BE464_Billbergia_vittata	0	910	2	97.4%	98.6%	49.2%	795.18	Wed Jan 23 09:44:49 CET 2019	Agt1 Bromeliaceae BLAST		0	true	99.3%
			BE457_Billbergia_euphemiae	0	898	2	96.7%	97.0%	48.6%	752707	Wed Jan 23 09:44:49 CET 2019	Agt1 Bromeliaceae BLAST		0	true	98.5%
			BE613_Billbergia_vittata	0	823	2	98.3%	98.8%	48.9%	728.7	Wed Jan 23 09:44:49 CET 2019	Agt1 Bromeliaceae BLAST		0	true	94.7%
			BE184_Portea_grandiflora	0	904	2	95.4%	95.6%	50.0%	723.16	Wed Jan 23 09:44:49 CET 2019	Agt1 Bromeliaceae BLAST		0	true	97.8%
			BE064_Aechmea_rubrolilacina	0	901	2	95.6%	95.7%	49.7%	723.16	Wed Jan 23 09:44:49 CET 2019	Agt1 Bromeliaceae BLAST		0	true	97.8%
			MegaBLAST results - only first 10 hits shown	# Nucleotide Sequences With Mates	# Nucleotides	# Sequences	% Identical Sites	% Pairwise Identity	%GC	Bit-Score	Created Date	Database	Description	E Value	Free end gaps	Grade
		BE416_Wittrockia_cyathiformis	BE416_Wittrockia_cyathiformis	0	996	2	100.0%	99.2%	48.6%	891205	Wed Jan 23 09:45:36 CET 2019	Agt1 Bromeliaceae BLAST		0	true	99.6%
			BE175_Wittrockia_gigantea	0	996	2	98.2%	99.0%	48.2%	885665	Wed Jan 23 09:45:36 CET 2019	Agt1 Bromeliaceae BLAST		0	true	99.5%
			BE489_Eduandrea_selloana	0	996	2	97.6%	98.4%	47.4%	869046	Wed Jan 23 09:45:36 CET 2019	Agt1 Bromeliaceae BLAST		0	true	99.2%
Nidularioid group			BE459_Nidularium campoalegrense	0	996	2	97.6%	98.4%	47.6%	869046	Wed Jan 23 09:45:36 CET 2019	Agt1 Bromeliaceae BLAST		0	true	99.2%
Heller 2018			BE109_Canistropsis_exigua	0	997	2	97.4%	98.3%	47.2%	865352	Wed Jan 23 09:45:36 CET 2019	Agt1 Bromeliaceae BLAST		0	true	99.1%
			BE136_Edmundoa_lindenii	0	998	2	97.2%	98.0%	47.4%	859812	Wed Jan 23 09:45:36 CET 2019	Agt1 Bromeliaceae BLAST		0	true	99.0%
			BE458_Nidularium_innocentii	0	996	2	97.2%	98.0%	47.6%	857966	Wed Jan 23 09:45:36 CET 2019	Agt1 Bromeliaceae BLAST		0	true	99.0%
			BE360_Edmundoa_lindenii	0	998	2	97.2%	97.9%	47.6%	856119	Wed Jan 23 09:45:36 CET 2019	Agt1 Bromeliaceae BLAST		0	true	98.9%
			BE180_Canistropsis_billbergioides	0	998	2	97.0%	97.8%	47.2%	854272	Wed Jan 23 09:45:36 CET 2019	Agt1 Bromeliaceae BLAST		0	true	98.9%
			BE133_Neoregelia_nivea	0	996	2	97.0%	97.9%	47.8%	854272	Wed Jan 23 09:45:36 CET 2019	Agt1 Bromeliaceae BLAST		0	true	98.9%
			MegaBLAST results - only first 10 hits shown	# Nucleotide Sequences With Mates	# Nucleotides	# Sequences	% Identical Sites	% Pairwise Identity	%GC	Bit-Score	Created Date	Database	Description	E Value	Free end gaps	Grade
		BE453_Wittmackia_lingulata	BE453_Wittmackia_lingulata	0	982	2	100.0%	100.0%	47.7%	907825	Wed Jan 23 09:48:25 CET 2019	Agt1 Bromeliaceae BLAST		0	true	100.0%
			BE401_Wittmackia_turbinocalyx	0	982	2	99.4%	99.4%	47.5%	891205	Wed Jan 23 09:48:25 CET 2019	Agt1 Bromeliaceae BLAST		0	true	99.7%
			BE331_Wittmackia_froesii	0	982	2	99.4%	99.4%	47.5%	891205	Wed Jan 23 09:48:25 CET 2019	Agt1 Bromeliaceae BLAST		0	true	99.7%
Wittmackia Ronnbergia group			BE250_Wittmackia_sulbahianensis	0	982	2	99.2%	99.3%	47.6%	887512	Wed Jan 23 09:48:25 CET 2019	Agt1 Bromeliaceae BLAST		0	true	99.6%
Heller 2018			BE548_Wittmackia_ituberaensis	0	982	2	99.2%	99.2%	47.7%	885665	Wed Jan 23 09:48:25 CET 2019	Agt1 Bromeliaceae BLAST		0	true	99.6%
			BE386_Wittmackia_incompta	0	982	2	99.2%	99.2%	47.5%	885665	Wed Jan 23 09:48:25 CET 2019	Agt1 Bromeliaceae BLAST		0	true	99.6%
			BE156_Wittmackia_lingulata	0	982	2	99.2%	99.2%	47.5%	885665	Wed Jan 23 09:48:25 CET 2019	Agt1 Bromeliaceae BLAST		0	true	99.6%
			BE408_Ronnbergia_fraseri	0	982	2	98.8%	99.3%	47.2%	883819	Wed Jan 23 09:48:25 CET 2019	Agt1 Bromeliaceae BLAST		0	true	99.6%
			BE443_Wittmackia_distans	0	982	2	99.0%	99.1%	47.1%	881972	Wed Jan 23 09:48:25 CET 2019	Agt1 Bromeliaceae BLAST		0	true	99.5%
			BE415_Wittmackia_lingulatoides	0	982	2	99.0%	99.0%	47.3%	880126	Wed Jan 23 09:48:25 CET 2019	Agt1 Bromeliaceae BLAST		0	true	99.5%
			MegaBLAST results - only first 10 hits shown	# Nucleotide Sequences With Mates	# Nucleotides	# Sequences	% Identical Sites	% Pairwise Identity	%GC	Bit-Score	Created Date	Database	Description	E Value	Free end gaps	Grade
		BE458_Nidularium_innocentii	BE458_Nidularium_innocentii	0	996	2	100.0%	100.0%	47.6%	920752	Wed Jan 23 09:48:48 CET 2019	Agt1 Bromeliaceae BLAST		0	true	100.0%
			BE482_Edmundoa_ambigua	0	998	2	99.2%	99.2%	47.0%	900439	Wed Jan 23 09:48:48 CET 2019	Agt1 Bromeliaceae BLAST		0	true	99.6%
			BE489_Eduandrea_selloana	0	996	2	99.2%	99.2%	47.4%	898592	Wed Jan 23 09:48:48 CET 2019	Agt1 Bromeliaceae BLAST		0	true	99.6%
			BE459_Nidularium campoalegrense	0	996	2	99.0%	99.0%	47.6%	893052	Wed Jan 23 09:48:48 CET 2019	Agt1 Bromeliaceae BLAST		0	true	99.5%
Nidularioid group			BE136_Edmundoa_lindenii	0	998	2	98.8%	98.8%	47.4%	889359	Wed Jan 23 09:48:48 CET 2019	Agt1 Bromeliaceae BLAST		0	true	99.4%
Heller 2018			BE175_Wittrockia_gigantea	0	996	2	98.8%	98.8%	48.2%	887512	Wed Jan 23 09:48:48 CET 2019	Agt1 Bromeliaceae BLAST		0	true	99.4%
			BE115_Nidularium_purpureum	0	996	2	98.8%	98.8%	47.8%	887512	Wed Jan 23 09:48:48 CET 2019	Agt1 Bromeliaceae BLAST		0	true	99.4%
			BE180_Canistropsis_billbergioides	0	998	2	98.6%	98.6%	47.2%	883819	Wed Jan 23 09:48:48 CET 2019	Agt1 Bromeliaceae BLAST		0	true	99.3%
			BE133_Neoregelia_nivea	0	996	2	98.6%	98.7%	47.8%	883819	Wed Jan 23 09:48:48 CET 2019	Agt1 Bromeliaceae BLAST		0	true	99.3%
			BE106_Neoregelia_concentrica	0	996	2	98.4%	98.8%	47.7%	883819	Wed Jan 23 09:48:48 CET 2019	Agt1 Bromeliaceae BLAST		0	true	99.4%
			MegaBLAST results - only first 10 hits shown	# Nucleotide Sequences With Mates	# Nucleotides	# Sequences	% Identical Sites	% Pairwise Identity	%GC	Bit-Score	Created Date	Database	Description	E Value	Free end gaps	Grade
		BE463_Neoregelia_lactea	BE624_Neoregelia_lymaniana	0	996	2	100.0%	100.0%	48.2%	920752	Wed Jan 23 09:49:13 CET 2019	Agt1 Bromeliaceae BLAST		0	true	100.0%
			BE463_Neoregelia_lactea	0	996	2	100.0%	100.0%	48.2%	920752	Wed Jan 23 09:49:13 CET 2019	Agt1 Bromeliaceae BLAST		0	true	100.0%
			BE623_Neoregelia_lactea	0	994	2	99.8%	99.8%	47.9%	913365	Wed Jan 23 09:49:13 CET 2019	Agt1 Bromeliaceae BLAST		0	true	99.8%
			BE616_Neoregelia_viridovinosa	0	996	2	99.0%	99.0%	48.2%	893052	Wed Jan 23 09:49:13 CET 2019	Agt1 Bromeliaceae BLAST		0	true	99.5%
Nidularioid group			BE563_Neoregelia_retrorsa	0	996	2	98.8%	98.9%	48.1%	889359	Wed Jan 23 09:49:13 CET 2019	Agt1 Bromeliaceae BLAST		0	true	99.4%
Heller 2018			BE118_Nidularium_fulgens	0	996	2	98.6%	99.0%	47.4%	889359	Wed Jan 23 09:49:13 CET 2019	Agt1 Bromeliaceae BLAST		0	true	99.5%
			BE136_Edmundoa_lindenii	0	998	2	98.6%	98.6%	47.4%	883819	Wed Jan 23 09:49:13 CET 2019	Agt1 Bromeliaceae BLAST		0	true	99.3%
			BE489_Eduandrea_selloana	0	996	2	98.6%	98.6%	47.4%	881972	Wed Jan 23 09:49:13 CET 2019	Agt1 Bromeliaceae BLAST		0	true	99.3%
			BE115_Nidularium_purpureum	0	996	2	98.6%	98.6%	47.8%	881972	Wed Jan 23 09:49:13 CET 2019	Agt1 Bromeliaceae BLAST		0	true	99.3%
			BE583_Neoregelia_pascoaliana	0	998	2	98.4%	98.4%	47.0%	878279	Wed Jan 23 09:49:13 CET 2019	Agt1 Bromeliaceae BLAST		0	true	99.2%
			MegaBLAST results - only first 10 hits shown	# Nucleotide Sequences With Mates	# Nucleotides	# Sequences	% Identical Sites	% Pairwise Identity	%GC	Bit-Score	Created Date	Database	Description	E Value	Free end gaps	Grade
		BE464_Billbergia_vittata	BE464_Billbergia_vittata	0	910	2	100.0%	99.0%	49.2%	808106	Wed Jan 23 09:49:49 CET 2019	Agt1 Bromeliaceae BLAST		0	true	99.5%
			BE377_Billbergia_elegans	0	910	2	97.4%	98.6%	48.9%	795.18	Wed Jan 23 09:49:49 CET 2019	Agt1 Bromeliaceae BLAST		0	true	99.3%
			BE584_Billbergia_horrida	0	910	2	96.9%	98.1%	48.7%	784.1	Wed Jan 23 09:49:49 CET 2019	Agt1 Bromeliaceae BLAST		0	true	99.1%
Billbergia Quesnelia subgen Billbergiopsis Aechmea subgen Aechmea group			BE429_Billbergia_elegans	0	910	2	96.9%	97.9%	48.6%	780406	Wed Jan 23 09:49:50 CET 2019	Agt1 Bromeliaceae BLAST		0	true	99.0%
Heller 2018			BE376_Billbergia_nana	0	914	2	96.7%	97.8%	48.5%	780406	Wed Jan 23 09:49:50 CET 2019	Agt1 Bromeliaceae BLAST		0	true	98.9%
			BE234_Billbergia_distachia	0	911	2	96.9%	97.8%	49.1%	778.56	Wed Jan 23 09:49:50 CET 2019	Agt1 Bromeliaceae BLAST		0	true	98.9%
			BE457_Billbergia_euphemiae	0	898	2	95.6%	96.4%	48.6%	732394	Wed Jan 23 09:49:50 CET 2019	Agt1 Bromeliaceae BLAST		0	true	98.2%
			BE613_Billbergia_vittata	0	823	2	97.1%	98.3%	48.9%	712.08	Wed Jan 23 09:49:50 CET 2019	Agt1 Bromeliaceae BLAST		0	true	94.4%
			BE184_Portea_grandiflora	0	904	2	93.9%	94.9%	50.0%	697307	Wed Jan 23 09:49:50 CET 2019	Agt1 Bromeliaceae BLAST		0	true	97.4%
			BE064_Aechmea_rubrolilacina	0	901	2	94.1%	95.0%	49.7%	697307	Wed Jan 23 09:49:50 CET 2019	Agt1 Bromeliaceae BLAST		0	true	97.4%
			MegaBLAST results - only first 10 hits shown	# Nucleotide Sequences With Mates	# Nucleotides	# Sequences	% Identical Sites	% Pairwise Identity	%GC	Bit-Score	Created Date	Database	Description	E Value	Free end gaps	Grade
		BE481_Canistrum_aurantiacum	BE481_Canistrum_aurantiacum	0	860	2	100.0%	99.9%	49.7%	791486	Wed Jan 23 09:52:57 CET 2019	Agt1 Bromeliaceae BLAST		0	true	99.9%
			BE082_Aechmea_cephaloides	0	860	2	99.1%	99.4%	49.7%	778.56	Wed Jan 23 09:52:57 CET 2019	Agt1 Bromeliaceae BLAST		0	true	99.7%
			BE073_Canistrum_alagoanum	0	860	2	98.6%	99.1%	49.6%	769327	Wed Jan 23 09:52:57 CET 2019	Agt1 Bromeliaceae BLAST		0	true	99.5%
Gravisia clade			BE070_Canistrum_aurantiacum	0	860	2	98.8%	99.0%	49.5%	769327	Wed Jan 23 09:52:57 CET 2019	Agt1 Bromeliaceae BLAST		0	true	99.5%
Heller 2018			BE064_Aechmea_rubrolilacina	0	863	2	98.6%	98.7%	49.9%	765633	Wed Jan 23 09:52:57 CET 2019	Agt1 Bromeliaceae BLAST		0	true	99.4%
			BE176_Aechmea_eurycorymbus	0	860	2	98.6%	98.7%	50.0%	763787	Wed Jan 23 09:52:57 CET 2019	Agt1 Bromeliaceae BLAST		0	true	99.4%
			BE090_Aechmea_guainumbiorum	0	859	2	98.4%	99.0%	49.9%	763787	Wed Jan 23 09:52:58 CET 2019	Agt1 Bromeliaceae BLAST		0	true	99.5%
			BE393_Aechmea_blanchetiana	0	859	2	98.6%	98.7%	49.2%	761.94	Wed Jan 23 09:52:58 CET 2019	Agt1 Bromeliaceae BLAST		0	true	99.4%
			BE182_Portea_kermesina	0	863	2	98.4%	98.6%	50.0%	761.94	Wed Jan 23 09:52:58 CET 2019	Agt1 Bromeliaceae BLAST		0	true	99.3%
			BE058_Aechmea_costantinii	0	860	2	98.4%	98.7%	49.1%	761.94	Wed Jan 23 09:52:58 CET 2019	Agt1 Bromeliaceae BLAST		0	true	99.4%
			MegaBLAST results - only first 10 hits shown	# Nucleotide Sequences With Mates	# Nucleotides	# Sequences	% Identical Sites	% Pairwise Identity	%GC	Bit-Score	Created Date	Database	Description	E Value	Free end gaps	Grade
		BE507_Aechmea_disjuncta	BE507_Aechmea_disjuncta	0	908	2	100.0%	99.1%	49.8%	809953	Wed Jan 23 09:57:10 CET 2019	Agt1 Bromeliaceae BLAST		0	true	99.4%
			BE620_Aechmea_fosteriana_var_rupicola	0	914	2	96.1%	97.0%	49.8%	760093	Wed Jan 23 09:57:10 CET 2019	Agt1 Bromeliaceae BLAST		0	true	98.4%
			BE511_Aechmea_disjuncta	0	897	2	94.9%	95.7%	50.3%	713927	Wed Jan 23 09:57:10 CET 2019	Agt1 Bromeliaceae BLAST		0	true	97.7%
			BB107_Aechmea_atrovittata	0	897	2	94.9%	95.7%	49.7%	713927	Wed Jan 23 09:57:10 CET 2019	Agt1 Bromeliaceae BLAST		0	true	97.7%
Cucullatanthus group			BE381_Aechmea_capixabae	0	906	2	94.5%	95.3%	48.7%	712.08	Wed Jan 23 09:57:10 CET 2019	Agt1 Bromeliaceae BLAST		0	true	97.5%
Heller 2018			BE077_Canistrum_fosterianum	0	897	2	94.7%	95.5%	49.7%	708387	Wed Jan 23 09:57:10 CET 2019	Agt1 Bromeliaceae BLAST		0	true	97.6%
			BE056_Aechmea_disjuncta	0	893	2	94.7%	95.5%	49.9%	704694	Wed Jan 23 09:57:10 CET 2019	Agt1 Bromeliaceae BLAST		0	true	97.4%
			BE645_Araeococcus_parviflorus	0	908	2	93.7%	94.6%	48.5%	693614	Wed Jan 23 09:57:10 CET 2019	Agt1 Bromeliaceae BLAST		0	true	97.2%
			BE257_Araeococcus chlorocarpus	0	908	2	93.7%	94.6%	48.6%	693614	Wed Jan 23 09:57:10 CET 2019	Agt1 Bromeliaceae BLAST		0	true	97.2%
			BE293_ Araeococcus_sessiliflorus	0	908	2	93.5%	94.4%	48.5%	689921	Wed Jan 23 09:57:10 CET 2019	Agt1 Bromeliaceae BLAST		0	true	97.1%
			MegaBLAST results - only first 10 hits shown	# Nucleotide Sequences With Mates	# Nucleotides	# Sequences	% Identical Sites	% Pairwise Identity	%GC	Bit-Score	Created Date	Database	Description	E Value	Free end gaps	Grade
		BE650_Lapanthus_vidaliorum	BE650_Lapanthus_vidaliorum	0	984	2	100.0%	100.0%	47.4%	909672	Wed Jan 23 10:00:31 CET 2019	Agt1 Bromeliaceae BLAST		0	true	100.0%
			BE652_Cryptanthus_glazioui	0	984	2	99.4%	99.4%	48.0%	893052	Wed Jan 23 10:00:31 CET 2019	Agt1 Bromeliaceae BLAST		0	true	99.7%
			BE685_Lapanthus_vidaliorum	0	954	2	100.0%	100.0%	47.0%	881972	Wed Jan 23 10:00:31 CET 2019	Agt1 Bromeliaceae BLAST		0	true	98.5%
Cryptanthiod group			BE651_Hoplocryptanthus_schwackeanus	0	984	2	99.0%	99.0%	47.8%	881972	Wed Jan 23 10:00:31 CET 2019	Agt1 Bromeliaceae BLAST		0	true	99.5%
Heller 2018			BE641_Hoplocryptanthus_caracensis	0	984	2	99.0%	99.0%	47.6%	881972	Wed Jan 23 10:00:31 CET 2019	Agt1 Bromeliaceae BLAST		0	true	99.5%
			BE500_Ananas_ananassioides	0	986	2	96.8%	96.8%	46.6%	822879	Wed Jan 23 10:00:31 CET 2019	Agt1 Bromeliaceae BLAST		0	true	98.4%
			BE495_Ananas_comosus	0	986	2	96.8%	96.8%	46.5%	822879	Wed Jan 23 10:00:31 CET 2019	Agt1 Bromeliaceae BLAST		0	true	98.4%
			BE501_Ananas_ananassioides	0	986	2	96.6%	96.8%	46.2%	821033	Wed Jan 23 10:00:31 CET 2019	Agt1 Bromeliaceae BLAST		0	true	98.4%
			BE210_Ananas_ananassioides	0	986	2	96.6%	96.8%	46.2%	821033	Wed Jan 23 10:00:31 CET 2019	Agt1 Bromeliaceae BLAST		0	true	98.4%
			BE178_Ananas_fritzmuelleri	0	987	2	96.6%	96.6%	46.7%	817339	Wed Jan 23 10:00:31 CET 2019	Agt1 Bromeliaceae BLAST		0	true	98.3%
			MegaBLAST results - only first 10 hits shown	# Nucleotide Sequences With Mates	# Nucleotides	# Sequences	% Identical Sites	% Pairwise Identity	%GC	Bit-Score	Created Date	Database	Description	E Value	Free end gaps	Grade
		BRC314_Tillandsia muhriae	BRC314_Tillandsia muhriae	0	814	2	100.0%	100.0%	43.2%	752707	Wed Jan 23 10:08:07 CET 2019	Agt1 Bromeliaceae BLAST	4 reads from 4 documents assembled using Geneious	0	true	100.0%
			BRC202_Tillandisa macbrideana	0	814	2	99.3%	99.4%	43.1%	737934	Wed Jan 23 10:08:07 CET 2019	Agt1 Bromeliaceae BLAST	3 reads from FB_BRC202 assembled using Geneious	0	true	99.7%
			BRC303_Tillandsia pseudomicans	0	814	2	98.8%	98.9%	43.0%	726854	Wed Jan 23 10:08:07 CET 2019	Agt1 Bromeliaceae BLAST	2 reads from BRC303_FB047 assembled using Geneious	0	true	99.4%
			BRC254_Tillandsia esseriana	0	811	2	99.0%	99.0%	43.1%	726854	Wed Jan 23 10:08:07 CET 2019	Agt1 Bromeliaceae BLAST	2 reads from FB_BRC_254 assembled using Geneious	0	true	99.5%
			BRC348_Tillandsia atroviridipetala	0	814	2	98.8%	98.8%	42.8%	725007	Wed Jan 23 10:08:07 CET 2019	Agt1 Bromeliaceae BLAST	2 reads from FB_BRC348 assembled using Geneious	0	true	99.4%
			BRC337_Tillandsia grandispica	0	814	2	98.8%	98.8%	42.8%	725007	Wed Jan 23 10:08:07 CET 2019	Agt1 Bromeliaceae BLAST	2 reads from FB_BRC337 assembled using Geneious	0	true	99.4%
			BRC410_Tillandsia xiphioides	0	818	2	98.5%	98.5%	42.6%	723.16	Wed Jan 23 10:08:07 CET 2019	Agt1 Bromeliaceae BLAST	2 reads from FB_BRC410 assembled using Geneious	0	true	99.3%
			BRC340_Tillandsia oblivata	0	814	2	98.5%	98.5%	43.5%	719467	Wed Jan 23 10:08:07 CET 2019	Agt1 Bromeliaceae BLAST	2 reads from FB_BRC340 assembled using Geneious	0	true	99.3%
			BRC228_Tillandsia balsasensis	0	814	2	98.5%	98.5%	43.5%	719467	Wed Jan 23 10:08:07 CET 2019	Agt1 Bromeliaceae BLAST	2 reads from FB_BRC228 assembled using Geneious	0	true	99.3%
			BRC316_Tillandsia friesii	0	819	2	98.3%	98.3%	42.5%	717.62	Wed Jan 23 10:08:07 CET 2019	Agt1 Bromeliaceae BLAST	2 reads from FB_BRC316 assembled using Geneious	0	true	99.2%
			MegaBLAST results - only first 10 hits shown	# Nucleotide Sequences With Mates	# Nucleotides	# Sequences	% Identical Sites	% Pairwise Identity	%GC	Bit-Score	Created Date	Database	Description	E Value	Free end gaps	Grade
		BRC452_Tillandsia xiphioides	BRC452_Tillandsia xiphioides	0	980	2	100.0%	100.0%	41.0%	905979	Wed Jan 23 10:09:50 CET 2019	Agt1 Bromeliaceae BLAST	2 reads from FB_452 assembled using Geneious	0	true	100.0%
			BRC390_Tillandsia hegeri	0	980	2	99.2%	99.4%	41.2%	887512	Wed Jan 23 10:09:50 CET 2019	Agt1 Bromeliaceae BLAST	2 reads from FB_BRC390 assembled using Geneious	0	true	99.7%
			BRC264_Tillandsia cardenasii	0	972	2	99.2%	99.4%	40.9%	880126	Wed Jan 23 10:09:50 CET 2019	Agt1 Bromeliaceae BLAST	2 reads from 2 documents assembled using Geneious	0	true	99.3%
			BRC281_Tillandsia lorentziana	0	972	2	99.0%	99.3%	41.2%	876432	Wed Jan 23 10:09:50 CET 2019	Agt1 Bromeliaceae BLAST	3 reads from 3 documents assembled using Geneious	0	true	99.2%
			BRC456_Tillandsia xiphioides	0	982	2	98.8%	98.8%	41.1%	874586	Wed Jan 23 10:09:50 CET 2019	Agt1 Bromeliaceae BLAST	2 reads from FB_BRC456 assembled using Geneious	0	true	99.4%
			BRC347_Tillandsia bermejoensis	0	972	2	98.8%	99.2%	41.0%	872739	Wed Jan 23 10:09:50 CET 2019	Agt1 Bromeliaceae BLAST	2 reads from FB_BRC347 assembled using Geneious	0	true	99.2%
			BRC316_Tillandsia friesii	0	981	2	98.8%	98.8%	41.3%	872739	Wed Jan 23 10:09:50 CET 2019	Agt1 Bromeliaceae BLAST	2 reads from FB_BRC316 assembled using Geneious	0	true	99.4%
			BRC457_Tillandsia bagua-grandensis	0	980	2	98.6%	98.7%	41.4%	869046	Wed Jan 23 10:09:50 CET 2019	Agt1 Bromeliaceae BLAST	2 reads from FB_BRC457 assembled using Geneious	0	true	99.3%
			BRC410_Tillandsia xiphioides	0	980	2	98.6%	98.6%	41.4%	867199	Wed Jan 23 10:09:50 CET 2019	Agt1 Bromeliaceae BLAST	2 reads from FB_BRC410 assembled using Geneious	0	true	99.3%
			BRC320_Tillandsia didisticha	0	924	2	98.3%	98.5%	40.4%	813646	Wed Jan 23 10:09:50 CET 2019	Agt1 Bromeliaceae BLAST	2 reads from FB_BRC_320 assembled using Geneious	0	true	96.4%
			MegaBLAST results - only first 10 hits shown	# Nucleotide Sequences With Mates	# Nucleotides	# Sequences	% Identical Sites	% Pairwise Identity	%GC	Bit-Score	Created Date	Database	Description	E Value	Free end gaps	Grade
		BRC041_Catopsis floribunda	BRC046_Catopsis sessiliflora	0	880	2	100.0%	100.0%	48.6%	813646	Wed Jan 23 10:06:39 CET 2019	Agt1 Bromeliaceae BLAST	2 reads from FB_BRC046_AGT1 assembled using Geneious	0	true	100.0%
			BRC042_Catopsis floribunda	0	880	2	100.0%	100.0%	48.6%	813646	Wed Jan 23 10:06:40 CET 2019	Agt1 Bromeliaceae BLAST	2 reads from FB_BRC042_AGT1 assembled using Geneious	0	true	100.0%
			BRC041_Catopsis floribunda	0	880	2	100.0%	100.0%	48.6%	813646	Wed Jan 23 10:06:40 CET 2019	Agt1 Bromeliaceae BLAST	2 reads from FB_BRC041_AGT1 assembled using Geneious	0	true	100.0%
Catopsis clade			BRC199_Catopsis minimiflora	0	866	2	98.8%	99.0%	47.7%	774866	Wed Jan 23 10:06:40 CET 2019	Agt1 Bromeliaceae BLAST	2 reads from FB_BRC199 assembled using Geneious	0	true	98.7%
Barfuss et al. 2016	AMBIGUOUS		BRC234_Catopsis morreniana	0	830	2	100.0%	100.0%	48.7%	767.48	Wed Jan 23 10:06:40 CET 2019	Agt1 Bromeliaceae BLAST	2 reads from FB_BRC234_AGT1 assembled using Geneious	0	true	97.2%
			BRC284_Tillandsia juncifolia	0	880	2	98.0%	98.1%	49.1%	765633	Wed Jan 23 10:06:40 CET 2019	Agt1 Bromeliaceae BLAST	2 reads from FB_BRC284 assembled using Geneious	0	true	99.0%
			BRC195_Catopsis subulata	0	860	2	98.6%	98.7%	49.5%	763787	Wed Jan 23 10:06:40 CET 2019	Agt1 Bromeliaceae BLAST	2 reads from FB_BRC195_AGT1 assembled using Geneious	0	true	98.2%
			BRC243_Tillandsia delicatula	0	866	2	98.2%	98.3%	48.4%	758247	Wed Jan 23 10:06:40 CET 2019	Agt1 Bromeliaceae BLAST	2 reads from FB_BRC_243 assembled using Geneious	0	true	98.3%
			BRC045_Catopsis nutans	0	866	2	98.2%	98.2%	48.5%	756.4	Wed Jan 23 10:06:40 CET 2019	Agt1 Bromeliaceae BLAST	2 reads from FB_BRC_045 assembled using Geneious	0	true	98.3%
			BRC043_Catopsis nutans	0	866	2	97.9%	97.9%	48.5%	750.86	Wed Jan 23 10:06:40 CET 2019	Agt1 Bromeliaceae BLAST	2 reads from FB_BRC_043 assembled using Geneious	0	true	98.2%
			MegaBLAST results - only first 10 hits shown	# Nucleotide Sequences With Mates	# Nucleotides	# Sequences	% Identical Sites	% Pairwise Identity	%GC	Bit-Score	Created Date	Database	Description	E Value	Free end gaps	Grade
		BRC043_Catopsis nutans	BRC043_Catopsis nutans	0	934	2	100.0%	100.0%	47.5%	863506	Wed Jan 23 10:06:59 CET 2019	Agt1 Bromeliaceae BLAST	2 reads from FB_BRC_043 assembled using Geneious	0	true	100.0%
			BRC044_Catopsis nutans	0	934	2	99.4%	99.4%	48.0%	846886	Wed Jan 23 10:06:59 CET 2019	Agt1 Bromeliaceae BLAST	2 reads from FB_BRC_044 assembled using Geneious	0	true	99.7%
			BRC243_Tillandsia delicatula	0	918	2	99.1%	99.2%	47.8%	828419	Wed Jan 23 10:06:59 CET 2019	Agt1 Bromeliaceae BLAST	2 reads from FB_BRC_243 assembled using Geneious	0	true	98.8%
			BRC045_Catopsis nutans	0	876	2	99.3%	99.3%	48.2%	793333	Wed Jan 23 10:06:59 CET 2019	Agt1 Bromeliaceae BLAST	2 reads from FB_BRC_045 assembled using Geneious	0	true	96.6%
			BRC199_Catopsis minimiflora	0	888	2	98.6%	98.8%	47.4%	789.64	Wed Jan 23 10:06:59 CET 2019	Agt1 Bromeliaceae BLAST	2 reads from FB_BRC199 assembled using Geneious	0	true	96.9%
			BRC075_Catopsis nutans	0	862	2	98.4%	98.4%	48.7%	758247	Wed Jan 23 10:06:59 CET 2019	Agt1 Bromeliaceae BLAST	2 reads from FB_BRC075_AGT1 assembled using Geneious	0	true	95.3%
			BRC046_Catopsis sessiliflora	0	866	2	97.9%	97.9%	48.3%	750.86	Wed Jan 23 10:06:59 CET 2019	Agt1 Bromeliaceae BLAST	2 reads from FB_BRC046_AGT1 assembled using Geneious	0	true	95.3%
			BRC042_Catopsis floribunda	0	866	2	97.9%	97.9%	48.3%	750.86	Wed Jan 23 10:06:59 CET 2019	Agt1 Bromeliaceae BLAST	2 reads from FB_BRC042_AGT1 assembled using Geneious	0	true	95.3%
			BRC041_Catopsis floribunda	0	866	2	97.9%	97.9%	48.3%	750.86	Wed Jan 23 10:06:59 CET 2019	Agt1 Bromeliaceae BLAST	2 reads from FB_BRC041_AGT1 assembled using Geneious	0	true	95.3%
			BRC284_Tillandsia juncifolia	0	866	2	97.7%	97.8%	48.7%	747167	Wed Jan 23 10:07:00 CET 2019	Agt1 Bromeliaceae BLAST	2 reads from FB_BRC284 assembled using Geneious	0	true	95.3%
			BRC195_Catopsis subulata	0	850	2	97.4%	97.5%	49.2%	726854	Wed Jan 23 10:07:00 CET 2019	Agt1 Bromeliaceae BLAST	2 reads from FB_BRC195_AGT1 assembled using Geneious	0	true	94.3%
			BRC234_Catopsis morreniana	0	820	2	98.0%	98.0%	48.3%	713927	Wed Jan 23 10:07:00 CET 2019	Agt1 Bromeliaceae BLAST	2 reads from FB_BRC234_AGT1 assembled using Geneious	0	true	92.9%
			BRC073_Catopsis nutans	0	786	2	98.5%	98.5%	47.1%	693614	Wed Jan 23 10:07:00 CET 2019	Agt1 Bromeliaceae BLAST	2 reads from FB_BRC_073 assembled using Geneious	0	true	91.3%
			BRC217_Catopsis paniculata	0	846	2	91.7%	91.7%	48.2%	582815	Wed Jan 23 10:07:00 CET 2019	Agt1 Bromeliaceae BLAST	2 reads from FB_BRC217 assembled using Geneious	4.11e-168	true	92.2%
			MegaBLAST results - only first 10 hits shown	# Nucleotide Sequences With Mates	# Nucleotides	# Sequences	% Identical Sites	% Pairwise Identity	%GC	Bit-Score	Created Date	Database	Description	E Value	Free end gaps	Grade
		BRC382_Tillandsia landbeckii	BRC403_Tillandsia usneoides	0	1076	2	100.0%	100.0%	40.9%	994618	Wed Jan 23 10:08:30 CET 2019	Agt1 Bromeliaceae BLAST	2 reads from FB_BRC403 assembled using Geneious	0	true	100.0%
			BRC385_Tillandsia landbeckii	0	1076	2	100.0%	100.0%	40.9%	994618	Wed Jan 23 10:08:30 CET 2019	Agt1 Bromeliaceae BLAST	2 reads from FB_BRC385 assembled using Geneious	0	true	100.0%
			BRC384_Tillandsia landbeckii	0	1076	2	100.0%	100.0%	40.9%	994618	Wed Jan 23 10:08:30 CET 2019	Agt1 Bromeliaceae BLAST	2 reads from FB_BRC384 assembled using Geneious	0	true	100.0%
			BRC383_Tillandsia landbeckii	0	1076	2	100.0%	100.0%	40.9%	994618	Wed Jan 23 10:08:30 CET 2019	Agt1 Bromeliaceae BLAST	2 reads from FB_BRC383 assembled using Geneious	0	true	100.0%
Tillandsia subgen Diaphoranthema			BRC382_Tillandsia landbeckii	0	1076	2	100.0%	100.0%	40.9%	994618	Wed Jan 23 10:08:30 CET 2019	Agt1 Bromeliaceae BLAST	2 reads from FB_BRC382 assembled using Geneious	0	true	100.0%
Barfuss et al. 2016			BRC380_Tillandsia landbeckii	0	1076	2	100.0%	100.0%	40.9%	994618	Wed Jan 23 10:08:30 CET 2019	Agt1 Bromeliaceae BLAST	2 reads from FB_BRC380 assembled using Geneious	0	true	100.0%
			BRC300_Tillandsia usneoides	0	1076	2	100.0%	100.0%	40.9%	994618	Wed Jan 23 10:08:30 CET 2019	Agt1 Bromeliaceae BLAST	2 reads from FB_BRC300 assembled using Geneious	0	true	100.0%
			BRC224_Tillandsia mollis	0	1076	2	100.0%	100.0%	40.9%	994618	Wed Jan 23 10:08:30 CET 2019	Agt1 Bromeliaceae BLAST	2 reads from FB_BRC224 assembled using Geneious	0	true	100.0%
			BRC396_Tillandsia usneoides	0	1077	2	99.4%	99.4%	40.4%	977998	Wed Jan 23 10:08:30 CET 2019	Agt1 Bromeliaceae BLAST	2 reads from FB_BRC396 assembled using Geneious	0	true	99.7%
			BRC398_Tillandsia usneoides	0	1069	2	99.6%	99.6%	40.9%	976151	Wed Jan 23 10:08:30 CET 2019	Agt1 Bromeliaceae BLAST	2 reads from FB_BRC398 assembled using Geneious	0	true	99.4%
			BRC386_Tillandsia landbeckii	0	1073	2	99.4%	99.4%	40.9%	974305	Wed Jan 23 10:08:30 CET 2019	Agt1 Bromeliaceae BLAST	2 reads from FB_BRC386 assembled using Geneious	0	true	99.7%
			BRC381_Tillandsia landbeckii	0	1065	2	99.4%	99.4%	41.2%	966918	Wed Jan 23 10:08:30 CET 2019	Agt1 Bromeliaceae BLAST	2 reads from FB_BRC381 assembled using Geneious	0	true	99.3%
			BRC424_Tillandsia capillaris	0	1080	2	98.9%	98.9%	41.1%	965071	Wed Jan 23 10:08:30 CET 2019	Agt1 Bromeliaceae BLAST	2 reads from FB_BRC424 assembled using Geneious	0	true	99.4%
			MegaBLAST results - only first 10 hits shown	# Nucleotide Sequences With Mates	# Nucleotides	# Sequences	% Identical Sites	% Pairwise Identity	%GC	Bit-Score	Created Date	Database	Description	E Value	Free end gaps	Grade
		BRC396_Tillandsia usneoides	BRC396_Tillandsia usneoides	0	1108	2	100.0%	100.0%	40.4%	1024.16	Wed Jan 23 10:08:49 CET 2019	Agt1 Bromeliaceae BLAST	2 reads from FB_BRC396 assembled using Geneious	0	true	100.0%
			BRC385_Tillandsia landbeckii	0	1107	2	99.5%	99.5%	40.9%	1005.7	Wed Jan 23 10:08:49 CET 2019	Agt1 Bromeliaceae BLAST	2 reads from FB_BRC385 assembled using Geneious	0	true	99.7%
			BRC384_Tillandsia landbeckii	0	1107	2	99.5%	99.5%	40.9%	1005.7	Wed Jan 23 10:08:49 CET 2019	Agt1 Bromeliaceae BLAST	2 reads from FB_BRC384 assembled using Geneious	0	true	99.7%
Tillandsia subgen Diaphoranthema			BRC224_Tillandsia mollis	0	1107	2	99.5%	99.5%	40.9%	1005.7	Wed Jan 23 10:08:49 CET 2019	Agt1 Bromeliaceae BLAST	2 reads from FB_BRC224 assembled using Geneious	0	true	99.7%
Barfuss et al. 2016			BRC383_Tillandsia landbeckii	0	1093	2	99.5%	99.5%	40.8%	992771	Wed Jan 23 10:08:49 CET 2019	Agt1 Bromeliaceae BLAST	2 reads from FB_BRC383 assembled using Geneious	0	true	99.1%
			BRC398_Tillandsia usneoides	0	1078	2	99.8%	99.8%	41.0%	990925	Wed Jan 23 10:08:49 CET 2019	Agt1 Bromeliaceae BLAST	2 reads from FB_BRC398 assembled using Geneious	0	true	98.6%
			BRC403_Tillandsia usneoides	0	1087	2	99.4%	99.4%	41.1%	987231	Wed Jan 23 10:08:49 CET 2019	Agt1 Bromeliaceae BLAST	2 reads from FB_BRC403 assembled using Geneious	0	true	98.8%
			BRC382_Tillandsia landbeckii	0	1077	2	99.4%	99.4%	40.9%	977998	Wed Jan 23 10:08:50 CET 2019	Agt1 Bromeliaceae BLAST	2 reads from FB_BRC382 assembled using Geneious	0	true	98.4%
			BRC380_Tillandsia landbeckii	0	1077	2	99.4%	99.4%	40.9%	977998	Wed Jan 23 10:08:50 CET 2019	Agt1 Bromeliaceae BLAST	2 reads from FB_BRC380 assembled using Geneious	0	true	98.4%
			BRC300_Tillandsia usneoides	0	1077	2	99.4%	99.4%	40.9%	977998	Wed Jan 23 10:08:50 CET 2019	Agt1 Bromeliaceae BLAST	2 reads from FB_BRC300 assembled using Geneious	0	true	98.4%
			BRC420_Tillandsia capillaris	0	1111	2	98.2%	98.3%	40.8%	972458	Wed Jan 23 10:08:50 CET 2019	Agt1 Bromeliaceae BLAST	2 reads from FB_BRC420 assembled using Geneious	0	true	99.1%

## Sheet: agt1_BLAST_Search_Exon
	Sequence BLASTed against Agt1 Bromeliaceae BLAST Megablast Database	MegaBLAST results - only first 10 hits shown	# Nucleotide Sequences With Mates	# Nucleotides	# Sequences	% Identical Sites	% Pairwise Identity	%GC	Bit-Score	Created Date	Database	E Value	Free end gaps	Grade
	BE650_Lapanthus_vidaliorum	BE685_Lapanthus_vidaliorum	0	528	2	100.0%	100.0%	50.8%	488636	Thu Sep 12 13:30:44 CEST 2019	Agt1 Bromeliaceae BLAST	5.05e-140	true	100.0%
		BE650_Lapanthus_vidaliorum	0	528	2	100.0%	100.0%	50.8%	488636	Thu Sep 12 13:30:44 CEST 2019	Agt1 Bromeliaceae BLAST	5.05e-140	true	100.0%
		BE664_Hoplocryptanthus_tiradentesensis	0	528	2	99.6%	99.6%	51.1%	483096	Thu Sep 12 13:30:44 CEST 2019	Agt1 Bromeliaceae BLAST	2.35e-138	true	99.8%
		BE652_Cryptanthus_glazioui	0	528	2	99.6%	99.6%	51.1%	483096	Thu Sep 12 13:30:44 CEST 2019	Agt1 Bromeliaceae BLAST	2.35e-138	true	99.8%
		BE651_Hoplocryptanthus_schwackeanus	0	528	2	99.6%	99.6%	51.1%	483096	Thu Sep 12 13:30:44 CEST 2019	Agt1 Bromeliaceae BLAST	2.35e-138	true	99.8%
POSITIVE		BE500_Ananas_ananassioides	0	528	2	99.2%	99.2%	50.0%	477556	Thu Sep 12 13:30:44 CEST 2019	Agt1 Bromeliaceae BLAST	1.09e-136	true	99.6%
		BE495_Ananas_comosus	0	528	2	99.2%	99.2%	50.0%	477556	Thu Sep 12 13:30:44 CEST 2019	Agt1 Bromeliaceae BLAST	1.09e-136	true	99.6%
		BE210_Ananas_ananassioides	0	528	2	99.2%	99.2%	50.0%	477556	Thu Sep 12 13:30:44 CEST 2019	Agt1 Bromeliaceae BLAST	1.09e-136	true	99.6%
		BE178_Ananas_fritzmuelleri	0	528	2	99.2%	99.2%	50.0%	477556	Thu Sep 12 13:30:44 CEST 2019	Agt1 Bromeliaceae BLAST	1.09e-136	true	99.6%
		BE501_Ananas_ananassioides	0	528	2	98.9%	99.1%	49.8%	473863	Thu Sep 12 13:30:44 CEST 2019	Agt1 Bromeliaceae BLAST	1.42e-135	true	99.5%
		BE499_Ananas_bracteatus	0	528	2	98.9%	99.1%	49.8%	473863	Thu Sep 12 13:30:44 CEST 2019	Agt1 Bromeliaceae BLAST	1.42e-135	true	99.5%
	BE449_Aechmea_hoppii	MegaBLAST results - only first 10 hits shown	# Nucleotide Sequences With Mates	# Nucleotides	# Sequences	% Identical Sites	% Pairwise Identity	%GC	Bit-Score	Created Date	Database	E Value	Free end gaps	Grade
		BE449_Aechmea_hoppii	0	528	2	100.0%	100.0%	52.3%	488636	Thu Sep 12 13:22:12 CEST 2019	Agt1 Bromeliaceae BLAST	5.05e-140	true	100.0%
		BE531_Aechmea_hoppii	0	528	2	99.6%	99.8%	52.3%	484943	Thu Sep 12 13:22:12 CEST 2019	Agt1 Bromeliaceae BLAST	6.54e-139	true	99.9%
		BRC393_Aechmea nudicaulis	0	528	2	99.6%	99.6%	52.3%	483096	Thu Sep 12 13:22:12 CEST 2019	Agt1 Bromeliaceae BLAST	2.35e-138	true	99.8%
		BRC392_Aechmea nudicaulis	0	528	2	99.6%	99.6%	52.3%	483096	Thu Sep 12 13:22:12 CEST 2019	Agt1 Bromeliaceae BLAST	2.35e-138	true	99.8%
		BE547_Aechmea_tillandsioides	0	528	2	99.6%	99.6%	52.7%	483096	Thu Sep 12 13:22:12 CEST 2019	Agt1 Bromeliaceae BLAST	2.35e-138	true	99.8%
		BE516_Aechmea_patriciae	0	528	2	99.6%	99.6%	52.7%	483096	Thu Sep 12 13:22:12 CEST 2019	Agt1 Bromeliaceae BLAST	2.35e-138	true	99.8%
		BE502_Aechmea_cucullata	0	528	2	99.6%	99.6%	52.7%	483096	Thu Sep 12 13:22:13 CEST 2019	Agt1 Bromeliaceae BLAST	2.35e-138	true	99.8%
		BE437_Aechmea_angustifolia	0	528	2	99.6%	99.6%	52.7%	483096	Thu Sep 12 13:22:13 CEST 2019	Agt1 Bromeliaceae BLAST	2.35e-138	true	99.8%
		BE402_Aechmea_roeseliae	0	528	2	99.6%	99.6%	52.7%	483096	Thu Sep 12 13:22:13 CEST 2019	Agt1 Bromeliaceae BLAST	2.35e-138	true	99.8%
		BE381_Aechmea_capixabae	0	528	2	99.6%	99.6%	52.3%	483096	Thu Sep 12 13:22:13 CEST 2019	Agt1 Bromeliaceae BLAST	2.35e-138	true	99.8%
	BE168_Aechmea_phanerophlebia	MegaBLAST results - only first 10 hits shown	# Nucleotide Sequences With Mates	# Nucleotides	# Sequences	% Identical Sites	% Pairwise Identity	%GC	Bit-Score	Created Date	Database	E Value	Free end gaps	Grade
		BE168_Aechmea_phanerophlebia	0	528	2	100.0%	100.0%	52.3%	488636	Thu Sep 12 13:28:01 CEST 2019	Agt1 Bromeliaceae BLAST	5.05e-140	true	100.0%
		BE374_Aechmea_phanerophlebia	0	528	2	99.6%	99.8%	52.1%	484943	Thu Sep 12 13:28:01 CEST 2019	Agt1 Bromeliaceae BLAST	6.54e-139	true	99.9%
		BE630_Quesnelia_edmundoi_var_rubrobracteata	0	528	2	99.6%	99.6%	51.9%	483096	Thu Sep 12 13:28:01 CEST 2019	Agt1 Bromeliaceae BLAST	2.35e-138	true	99.8%
		BE620_Aechmea_fosteriana_var_rupicola	0	528	2	99.6%	99.6%	51.9%	483096	Thu Sep 12 13:28:01 CEST 2019	Agt1 Bromeliaceae BLAST	2.35e-138	true	99.8%
		BE540_Aechmea_weilbachii_var_albipetala	0	528	2	99.6%	99.6%	51.9%	483096	Thu Sep 12 13:28:01 CEST 2019	Agt1 Bromeliaceae BLAST	2.35e-138	true	99.8%
		BE498_Aechmea_rubroaristata	0	528	2	99.6%	99.6%	51.9%	483096	Thu Sep 12 13:28:02 CEST 2019	Agt1 Bromeliaceae BLAST	2.35e-138	true	99.8%
		BE384_Aechmea_mutica	0	528	2	99.6%	99.6%	51.9%	483096	Thu Sep 12 13:28:02 CEST 2019	Agt1 Bromeliaceae BLAST	2.35e-138	true	99.8%
		BE342_Aechmea_aiuruocensis	0	528	2	99.6%	99.6%	52.7%	483096	Thu Sep 12 13:28:02 CEST 2019	Agt1 Bromeliaceae BLAST	2.35e-138	true	99.8%
		BE234_Billbergia_distachia	0	528	2	99.6%	99.6%	52.7%	483096	Thu Sep 12 13:28:02 CEST 2019	Agt1 Bromeliaceae BLAST	2.35e-138	true	99.8%
		BE094_Quesnelia_lateralis	0	528	2	99.6%	99.6%	51.9%	483096	Thu Sep 12 13:28:02 CEST 2019	Agt1 Bromeliaceae BLAST	2.35e-138	true	99.8%
	BE246_Aechmea_tonduzii	MegaBLAST results - only first 10 hits shown	# Nucleotide Sequences With Mates	# Nucleotides	# Sequences	% Identical Sites	% Pairwise Identity	%GC	Bit-Score	Created Date	Database	E Value	Free end gaps	Grade
		BE427_Aechmea_tonduzii	0	528	2	100.0%	100.0%	52.3%	488636	Thu Sep 12 13:28:36 CEST 2019	Agt1 Bromeliaceae BLAST	5.05e-140	true	100.0%
		BE246_Aechmea_tonduzii	0	528	2	100.0%	100.0%	52.3%	488636	Thu Sep 12 13:28:36 CEST 2019	Agt1 Bromeliaceae BLAST	5.05e-140	true	100.0%
		BE410_Aechmea_bruggeri	0	528	2	98.9%	98.9%	52.3%	472016	Thu Sep 12 13:28:36 CEST 2019	Agt1 Bromeliaceae BLAST	5.09e-135	true	99.4%
		BE243_Aechmea_leptantha	0	528	2	98.9%	98.9%	51.9%	472016	Thu Sep 12 13:28:36 CEST 2019	Agt1 Bromeliaceae BLAST	5.09e-135	true	99.4%
		BE112_Quesnelia_koltesii	0	528	2	98.9%	98.9%	52.3%	472016	Thu Sep 12 13:28:37 CEST 2019	Agt1 Bromeliaceae BLAST	5.09e-135	true	99.4%
		BE546_Aechmea_longifolia	0	528	2	98.5%	98.7%	52.5%	468323	Thu Sep 12 13:28:37 CEST 2019	Agt1 Bromeliaceae BLAST	6.58e-134	true	99.3%
		BE636_Ronnbergia_silvana	0	528	2	98.5%	98.5%	52.7%	466476	Thu Sep 12 13:28:37 CEST 2019	Agt1 Bromeliaceae BLAST	2.37e-133	true	99.2%
		BE575_Aechmea_ramosa	0	528	2	98.5%	98.5%	52.7%	466476	Thu Sep 12 13:28:37 CEST 2019	Agt1 Bromeliaceae BLAST	2.37e-133	true	99.2%
		BE559_Aechmea_roberto_seodelii	0	528	2	98.5%	98.5%	52.7%	466476	Thu Sep 12 13:28:37 CEST 2019	Agt1 Bromeliaceae BLAST	2.37e-133	true	99.2%
		BE523_Hohenbergia_burle-marxii	0	528	2	98.5%	98.5%	52.7%	466476	Thu Sep 12 13:28:37 CEST 2019	Agt1 Bromeliaceae BLAST	2.37e-133	true	99.2%
	BE677_Orthophytum_duartei	MegaBLAST results - only first 10 hits shown	# Nucleotide Sequences With Mates	# Nucleotides	# Sequences	% Identical Sites	% Pairwise Identity	%GC	Bit-Score	Created Date	Database	E Value	Free end gaps	Grade
		BE692_Orthophytum_duartei	0	528	2	100.0%	100.0%	52.7%	488636	Thu Sep 12 13:31:03 CEST 2019	Agt1 Bromeliaceae BLAST	5.05e-140	true	100.0%
		BE677_Orthophytum_duartei	0	528	2	100.0%	100.0%	52.7%	488636	Thu Sep 12 13:31:03 CEST 2019	Agt1 Bromeliaceae BLAST	5.05e-140	true	100.0%
		BE644_Orthophytum_zanonii	0	528	2	99.6%	99.6%	52.3%	483096	Thu Sep 12 13:31:03 CEST 2019	Agt1 Bromeliaceae BLAST	2.35e-138	true	99.8%
		BE492_Orthophytum_vagans	0	528	2	99.6%	99.6%	52.3%	483096	Thu Sep 12 13:31:03 CEST 2019	Agt1 Bromeliaceae BLAST	2.35e-138	true	99.8%
		BE680_Orthophytum_pseudovagans	0	526	2	99.6%	99.6%	52.5%	481249	Thu Sep 12 13:31:03 CEST 2019	Agt1 Bromeliaceae BLAST	8.46e-138	true	99.6%
		BE683_Orthophytum_roseolilacinum	0	528	2	98.5%	98.5%	51.9%	466476	Thu Sep 12 13:31:03 CEST 2019	Agt1 Bromeliaceae BLAST	2.37e-133	true	99.2%
		BE684_Orthophytum_vasconcelosianum	0	528	2	98.1%	98.1%	53.0%	460936	Thu Sep 12 13:31:04 CEST 2019	Agt1 Bromeliaceae BLAST	1.10e-131	true	99.1%
		BE693_Orthophytum_roseolilacinum	0	518	2	98.5%	98.5%	51.7%	457243	Thu Sep 12 13:31:04 CEST 2019	Agt1 Bromeliaceae BLAST	1.43e-130	true	98.3%
		BE276_Neoglaziovia burle-marxii	0	528	2	97.3%	97.5%	50.6%	451703	Thu Sep 12 13:31:04 CEST 2019	Agt1 Bromeliaceae BLAST	6.63e-129	true	98.8%
		BE264_Aechmea_tayoensis	0	528	2	97.3%	97.5%	51.7%	451703	Thu Sep 12 13:31:04 CEST 2019	Agt1 Bromeliaceae BLAST	6.63e-129	true	98.8%
	BE683_Orthophytum_roseolilacinum	MegaBLAST results - only first 10 hits shown	# Nucleotide Sequences With Mates	# Nucleotides	# Sequences	% Identical Sites	% Pairwise Identity	%GC	Bit-Score	Created Date	Database	E Value	Free end gaps	Grade
		BE683_Orthophytum_roseolilacinum	0	528	2	100.0%	100.0%	51.9%	488636	Thu Sep 12 13:31:17 CEST 2019	Agt1 Bromeliaceae BLAST	5.05e-140	true	100.0%
		BE693_Orthophytum_roseolilacinum	0	518	2	100.0%	100.0%	51.7%	479403	Thu Sep 12 13:31:17 CEST 2019	Agt1 Bromeliaceae BLAST	3.04e-137	true	99.1%
		BE684_Orthophytum_vasconcelosianum	0	528	2	98.9%	98.9%	53.0%	472016	Thu Sep 12 13:31:17 CEST 2019	Agt1 Bromeliaceae BLAST	5.09e-135	true	99.4%
		BE644_Orthophytum_zanonii	0	528	2	98.9%	98.9%	52.3%	472016	Thu Sep 12 13:31:17 CEST 2019	Agt1 Bromeliaceae BLAST	5.09e-135	true	99.4%
		BE492_Orthophytum_vagans	0	528	2	98.9%	98.9%	52.3%	472016	Thu Sep 12 13:31:17 CEST 2019	Agt1 Bromeliaceae BLAST	5.09e-135	true	99.4%
		BE680_Orthophytum_pseudovagans	0	526	2	98.9%	98.9%	52.5%	470169	Thu Sep 12 13:31:17 CEST 2019	Agt1 Bromeliaceae BLAST	1.83e-134	true	99.2%
		BE692_Orthophytum_duartei	0	528	2	98.5%	98.5%	52.7%	466476	Thu Sep 12 13:31:17 CEST 2019	Agt1 Bromeliaceae BLAST	2.37e-133	true	99.2%
		BE677_Orthophytum_duartei	0	528	2	98.5%	98.5%	52.7%	466476	Thu Sep 12 13:31:17 CEST 2019	Agt1 Bromeliaceae BLAST	2.37e-133	true	99.2%
		BE662_Rokautskyia_pseudoscaposa	0	528	2	98.5%	98.5%	52.3%	466476	Thu Sep 12 13:31:17 CEST 2019	Agt1 Bromeliaceae BLAST	2.37e-133	true	99.2%
		BE621_Rokautskyia_roberto-kautskyi	0	528	2	98.5%	98.5%	52.3%	466476	Thu Sep 12 13:31:17 CEST 2019	Agt1 Bromeliaceae BLAST	2.37e-133	true	99.2%
	BRC089_Hechtia guatemalensis	MegaBLAST results - only first 10 hits shown	# Nucleotide Sequences With Mates	# Nucleotides	# Sequences	% Identical Sites	% Pairwise Identity	%GC	Bit-Score	Created Date	Database	E Value	Free end gaps	Grade
		BRC089_Hechtia guatemalensis	0	528	2	100.0%	100.0%	48.5%	488636	Thu Sep 12 13:31:54 CEST 2019	Agt1 Bromeliaceae BLAST	5.05e-140	true	100.0%
		BRC023_Hechtia guatemalensis	0	528	2	98.5%	98.5%	47.7%	466476	Thu Sep 12 13:31:54 CEST 2019	Agt1 Bromeliaceae BLAST	2.37e-133	true	99.2%
		BRC378_Navia saxicola	0	528	2	96.6%	96.6%	49.2%	438776	Thu Sep 12 13:31:54 CEST 2019	Agt1 Bromeliaceae BLAST	5.16e-125	true	98.3%
		BRC367_Tillandsia lajensis	0	528	2	96.6%	96.6%	48.9%	438776	Thu Sep 12 13:31:54 CEST 2019	Agt1 Bromeliaceae BLAST	5.16e-125	true	98.3%
		BRC343_Tillandsia caerulea	0	528	2	96.2%	96.2%	48.5%	433236	Thu Sep 12 13:31:54 CEST 2019	Agt1 Bromeliaceae BLAST	2.40e-123	true	98.1%
		BRC258_Tillandsia humilis	0	528	2	96.2%	96.2%	48.5%	433236	Thu Sep 12 13:31:54 CEST 2019	Agt1 Bromeliaceae BLAST	2.40e-123	true	98.1%
		BRC234_Catopsis morreniana	0	528	2	96.2%	96.2%	51.1%	433236	Thu Sep 12 13:31:54 CEST 2019	Agt1 Bromeliaceae BLAST	2.40e-123	true	98.1%
		BRC046_Catopsis sessiliflora	0	528	2	96.2%	96.2%	51.1%	433236	Thu Sep 12 13:31:54 CEST 2019	Agt1 Bromeliaceae BLAST	2.40e-123	true	98.1%
		BRC042_Catopsis floribunda	0	528	2	96.2%	96.2%	51.1%	433236	Thu Sep 12 13:31:54 CEST 2019	Agt1 Bromeliaceae BLAST	2.40e-123	true	98.1%
		BRC041_Catopsis floribunda	0	528	2	96.2%	96.2%	51.1%	433236	Thu Sep 12 13:31:54 CEST 2019	Agt1 Bromeliaceae BLAST	2.40e-123	true	98.1%
	BE469_Aechmea_longifolia	MegaBLAST results - only first 10 hits shown	# Nucleotide Sequences With Mates	# Nucleotides	# Sequences	% Identical Sites	% Pairwise Identity	%GC	Bit-Score	Created Date	Database	E Value	Free end gaps	Grade
		BE469_Aechmea_longifolia	0	528	2	100.0%	100.0%	52.7%	488636	Thu Sep 12 13:22:33 CEST 2019	Agt1 Bromeliaceae BLAST	5.05e-140	true	100.0%
		BE546_Aechmea_longifolia	0	528	2	99.6%	99.8%	52.5%	484943	Thu Sep 12 13:22:34 CEST 2019	Agt1 Bromeliaceae BLAST	6.54e-139	true	99.9%
		BE575_Aechmea_ramosa	0	528	2	99.2%	99.2%	52.7%	477556	Thu Sep 12 13:22:34 CEST 2019	Agt1 Bromeliaceae BLAST	1.09e-136	true	99.6%
		BE523_Hohenbergia_burle-marxii	0	528	2	99.2%	99.2%	52.7%	477556	Thu Sep 12 13:22:34 CEST 2019	Agt1 Bromeliaceae BLAST	1.09e-136	true	99.6%
		BE449_Aechmea_hoppii	0	528	2	99.2%	99.2%	52.3%	477556	Thu Sep 12 13:22:34 CEST 2019	Agt1 Bromeliaceae BLAST	1.09e-136	true	99.6%
		BE413_Portea_filifera	0	528	2	99.2%	99.2%	52.7%	477556	Thu Sep 12 13:22:34 CEST 2019	Agt1 Bromeliaceae BLAST	1.09e-136	true	99.6%
		BE358_Hohenbergia_stellata	0	528	2	99.2%	99.2%	52.7%	477556	Thu Sep 12 13:22:34 CEST 2019	Agt1 Bromeliaceae BLAST	1.09e-136	true	99.6%
		BE233_Hohenbergia_stellata	0	528	2	99.2%	99.2%	52.7%	477556	Thu Sep 12 13:22:34 CEST 2019	Agt1 Bromeliaceae BLAST	1.09e-136	true	99.6%
		BE229_Hohenbergia_loredanoana	0	528	2	99.2%	99.2%	52.7%	477556	Thu Sep 12 13:22:34 CEST 2019	Agt1 Bromeliaceae BLAST	1.09e-136	true	99.6%
		BE198_Aechmea_racinae	0	528	2	99.2%	99.2%	52.7%	477556	Thu Sep 12 13:22:34 CEST 2019	Agt1 Bromeliaceae BLAST	1.09e-136	true	99.6%
	BE587_Neoregelia_myrmecophila	MegaBLAST results - only first 10 hits shown	# Nucleotide Sequences With Mates	# Nucleotides	# Sequences	% Identical Sites	% Pairwise Identity	%GC	Bit-Score	Created Date	Database	E Value	Free end gaps	Grade
		BE597_Neoregelia_myrmecophila	0	528	2	98.9%	99.4%	53.4%	477556	Thu Sep 12 13:30:03 CEST 2019	Agt1 Bromeliaceae BLAST	1.09e-136	true	99.7%
		BE587_Neoregelia_myrmecophila	0	528	2	100.0%	99.4%	53.4%	477556	Thu Sep 12 13:30:03 CEST 2019	Agt1 Bromeliaceae BLAST	1.09e-136	true	99.7%
		BE131_Neoregelia_margaretae	0	528	2	98.5%	99.1%	53.0%	472016	Thu Sep 12 13:30:04 CEST 2019	Agt1 Bromeliaceae BLAST	5.09e-135	true	99.5%
		BE627_Neoregelia_eleutheropetala	0	528	2	98.5%	98.7%	54.0%	464629	Thu Sep 12 13:30:04 CEST 2019	Agt1 Bromeliaceae BLAST	8.52e-133	true	99.3%
		BE474_Aechmea_contracta	0	528	2	97.7%	98.5%	52.9%	462783	Thu Sep 12 13:30:04 CEST 2019	Agt1 Bromeliaceae BLAST	3.06e-132	true	99.2%
		BE645_Araeococcus_parviflorus	0	528	2	97.7%	98.3%	52.3%	460936	Thu Sep 12 13:30:04 CEST 2019	Agt1 Bromeliaceae BLAST	1.10e-131	true	99.1%
		BE629_Aechmea_filicaulis	0	528	2	97.7%	98.3%	52.7%	460936	Thu Sep 12 13:30:04 CEST 2019	Agt1 Bromeliaceae BLAST	1.10e-131	true	99.1%
		BE547_Aechmea_tillandsioides	0	528	2	97.7%	98.3%	52.7%	460936	Thu Sep 12 13:30:04 CEST 2019	Agt1 Bromeliaceae BLAST	1.10e-131	true	99.1%
		BE502_Aechmea_cucullata	0	528	2	97.7%	98.3%	52.7%	460936	Thu Sep 12 13:30:04 CEST 2019	Agt1 Bromeliaceae BLAST	1.10e-131	true	99.1%
		BE437_Aechmea_angustifolia	0	528	2	97.7%	98.3%	52.7%	460936	Thu Sep 12 13:30:04 CEST 2019	Agt1 Bromeliaceae BLAST	1.10e-131	true	99.1%
	BRC043_Catopsis nutans	MegaBLAST results - only first 10 hits shown	# Nucleotide Sequences With Mates	# Nucleotides	# Sequences	% Identical Sites	% Pairwise Identity	%GC	Bit-Score	Created Date	Database	E Value	Free end gaps	Grade
		BRC043_Catopsis nutans	0	528	2	100.0%	100.0%	51.5%	488636	Thu Sep 12 13:44:00 CEST 2019	Agt1 Bromeliaceae BLAST	5.05e-140	true	100.0%
		BRC045_Catopsis nutans	0	528	2	99.6%	99.6%	51.5%	483096	Thu Sep 12 13:44:00 CEST 2019	Agt1 Bromeliaceae BLAST	2.35e-138	true	99.8%
		BRC243_Tillandsia delicatula	0	528	2	99.2%	99.4%	51.3%	479403	Thu Sep 12 13:44:00 CEST 2019	Agt1 Bromeliaceae BLAST	3.04e-137	true	99.7%
		BRC234_Catopsis morreniana	0	528	2	99.2%	99.2%	51.1%	477556	Thu Sep 12 13:44:00 CEST 2019	Agt1 Bromeliaceae BLAST	1.09e-136	true	99.6%
		BRC046_Catopsis sessiliflora	0	528	2	99.2%	99.2%	51.1%	477556	Thu Sep 12 13:44:00 CEST 2019	Agt1 Bromeliaceae BLAST	1.09e-136	true	99.6%
		BRC044_Catopsis nutans	0	528	2	99.2%	99.2%	51.9%	477556	Thu Sep 12 13:44:00 CEST 2019	Agt1 Bromeliaceae BLAST	1.09e-136	true	99.6%
		BRC042_Catopsis floribunda	0	528	2	99.2%	99.2%	51.1%	477556	Thu Sep 12 13:44:00 CEST 2019	Agt1 Bromeliaceae BLAST	1.09e-136	true	99.6%
		BRC041_Catopsis floribunda	0	528	2	99.2%	99.2%	51.1%	477556	Thu Sep 12 13:44:00 CEST 2019	Agt1 Bromeliaceae BLAST	1.09e-136	true	99.6%
		BRC199_Catopsis minimiflora	0	528	2	98.9%	99.1%	51.0%	473863	Thu Sep 12 13:44:00 CEST 2019	Agt1 Bromeliaceae BLAST	1.42e-135	true	99.5%
		BRC284_Tillandsia juncifolia	0	528	2	98.9%	98.9%	51.5%	472016	Thu Sep 12 13:44:00 CEST 2019	Agt1 Bromeliaceae BLAST	5.09e-135	true	99.4%
	BRC305_Tillandsia ionantha	MegaBLAST results - only first 10 hits shown	# Nucleotide Sequences With Mates	# Nucleotides	# Sequences	% Identical Sites	% Pairwise Identity	%GC	Bit-Score	Created Date	Database	E Value	Free end gaps	Grade
		BRC305_Tillandsia ionantha	0	528	2	100.0%	99.8%	50.4%	484943	Thu Sep 12 13:24:24 CEST 2019	Agt1 Bromeliaceae BLAST	6.54e-139	true	99.9%
		BRC437_Tillandsia inonantha	0	528	2	99.2%	99.4%	50.0%	479403	Thu Sep 12 13:24:24 CEST 2019	Agt1 Bromeliaceae BLAST	3.04e-137	true	99.7%
		BRC434_Tillandsia ionantha	0	528	2	99.2%	99.4%	50.0%	479403	Thu Sep 12 13:24:24 CEST 2019	Agt1 Bromeliaceae BLAST	3.04e-137	true	99.7%
		BRC404_Tillandsia ionantha	0	528	2	99.2%	99.4%	50.0%	479403	Thu Sep 12 13:24:24 CEST 2019	Agt1 Bromeliaceae BLAST	3.04e-137	true	99.7%
NEGATIVE		BRC301_Tillandsia ehlersiana	0	528	2	99.2%	99.4%	50.0%	479403	Thu Sep 12 13:24:25 CEST 2019	Agt1 Bromeliaceae BLAST	3.04e-137	true	99.7%
		BRC266_Tillandsia harrisii	0	528	2	98.9%	99.2%	50.2%	475709	Thu Sep 12 13:24:25 CEST 2019	Agt1 Bromeliaceae BLAST	3.93e-136	true	99.6%
		BRC387_Tillandsia delicata	0	528	2	98.9%	99.1%	49.6%	473863	Thu Sep 12 13:24:25 CEST 2019	Agt1 Bromeliaceae BLAST	1.42e-135	true	99.5%
		BRC344_Tillandsia calipaensis	0	528	2	98.9%	99.1%	50.4%	473863	Thu Sep 12 13:24:25 CEST 2019	Agt1 Bromeliaceae BLAST	1.42e-135	true	99.5%
		BRC333_Tillandsia magnusiana	0	528	2	98.9%	99.1%	50.4%	473863	Thu Sep 12 13:24:25 CEST 2019	Agt1 Bromeliaceae BLAST	1.42e-135	true	99.5%
		BRC331_Tillandsia kammii	0	528	2	98.9%	99.1%	50.4%	473863	Thu Sep 12 13:24:25 CEST 2019	Agt1 Bromeliaceae BLAST	1.42e-135	true	99.5%
	BE475_Quesnelia__edmundoi_var_edmundoi	MegaBLAST results - only first 10 hits shown	# Nucleotide Sequences With Mates	# Nucleotides	# Sequences	% Identical Sites	% Pairwise Identity	%GC	Bit-Score	Created Date	Database	E Value	Free end gaps	Grade
		BE475_Quesnelia__edmundoi_var_edmundoi	0	528	2	100.0%	99.8%	52.5%	484943	Thu Sep 12 13:24:47 CEST 2019	Agt1 Bromeliaceae BLAST	6.54e-139	true	99.9%
		BE630_Quesnelia_edmundoi_var_rubrobracteata	0	528	2	99.2%	99.4%	51.9%	479403	Thu Sep 12 13:24:47 CEST 2019	Agt1 Bromeliaceae BLAST	3.04e-137	true	99.7%
		BE620_Aechmea_fosteriana_var_rupicola	0	528	2	99.2%	99.4%	51.9%	479403	Thu Sep 12 13:24:47 CEST 2019	Agt1 Bromeliaceae BLAST	3.04e-137	true	99.7%
		BE540_Aechmea_weilbachii_var_albipetala	0	528	2	99.2%	99.4%	51.9%	479403	Thu Sep 12 13:24:47 CEST 2019	Agt1 Bromeliaceae BLAST	3.04e-137	true	99.7%
		BE498_Aechmea_rubroaristata	0	528	2	99.2%	99.4%	51.9%	479403	Thu Sep 12 13:24:47 CEST 2019	Agt1 Bromeliaceae BLAST	3.04e-137	true	99.7%
		BE384_Aechmea_mutica	0	528	2	99.2%	99.4%	51.9%	479403	Thu Sep 12 13:24:47 CEST 2019	Agt1 Bromeliaceae BLAST	3.04e-137	true	99.7%
		BE094_Quesnelia_lateralis	0	528	2	99.2%	99.4%	51.9%	479403	Thu Sep 12 13:24:47 CEST 2019	Agt1 Bromeliaceae BLAST	3.04e-137	true	99.7%
		BE074_Aechmea_bambusoides	0	528	2	99.2%	99.4%	51.9%	479403	Thu Sep 12 13:24:47 CEST 2019	Agt1 Bromeliaceae BLAST	3.04e-137	true	99.7%
		BE049_Quesnelia_edmundoi_var_rubrobracteata	0	528	2	99.2%	99.4%	51.9%	479403	Thu Sep 12 13:24:48 CEST 2019	Agt1 Bromeliaceae BLAST	3.04e-137	true	99.7%
		BE400_Aechmea_triticina	0	528	2	98.9%	99.2%	51.7%	475709	Thu Sep 12 13:24:48 CEST 2019	Agt1 Bromeliaceae BLAST	3.93e-136	true	99.6%
		BE374_Aechmea_phanerophlebia	0	528	2	98.9%	99.2%	52.1%	475709	Thu Sep 12 13:24:48 CEST 2019	Agt1 Bromeliaceae BLAST	3.93e-136	true	99.6%
	BE416_Wittrockia_cyathiformis	MegaBLAST results - only first 10 hits shown	# Nucleotide Sequences With Mates	# Nucleotides	# Sequences	% Identical Sites	% Pairwise Identity	%GC	Bit-Score	Created Date	Database	E Value	Free end gaps	Grade
		BE416_Wittrockia_cyathiformis	0	528	2	100.0%	100.0%	51.9%	488636	Thu Sep 12 13:26:25 CEST 2019	Agt1 Bromeliaceae BLAST	5.05e-140	true	100.0%
		BE104_Neoregelia_wilsoniana	0	528	2	99.6%	99.8%	51.7%	484943	Thu Sep 12 13:26:25 CEST 2019	Agt1 Bromeliaceae BLAST	6.54e-139	true	99.9%
		BE583_Neoregelia_pascoaliana	0	528	2	99.6%	99.6%	51.5%	483096	Thu Sep 12 13:26:25 CEST 2019	Agt1 Bromeliaceae BLAST	2.35e-138	true	99.8%
		BE578_Neoregelia_tenebrosa	0	528	2	99.6%	99.6%	51.5%	483096	Thu Sep 12 13:26:25 CEST 2019	Agt1 Bromeliaceae BLAST	2.35e-138	true	99.8%
		BE489_Eduandrea_selloana	0	528	2	99.6%	99.6%	51.5%	483096	Thu Sep 12 13:26:25 CEST 2019	Agt1 Bromeliaceae BLAST	2.35e-138	true	99.8%
		BE488_Neoregelia_pineliana	0	528	2	99.6%	99.6%	51.5%	483096	Thu Sep 12 13:26:25 CEST 2019	Agt1 Bromeliaceae BLAST	2.35e-138	true	99.8%
		BE482_Edmundoa_ambigua	0	528	2	99.6%	99.6%	51.5%	483096	Thu Sep 12 13:26:25 CEST 2019	Agt1 Bromeliaceae BLAST	2.35e-138	true	99.8%
		BE458_Nidularium_innocentii	0	528	2	99.6%	99.6%	51.5%	483096	Thu Sep 12 13:26:25 CEST 2019	Agt1 Bromeliaceae BLAST	2.35e-138	true	99.8%
		BE360_Edmundoa_lindenii	0	528	2	99.6%	99.6%	51.5%	483096	Thu Sep 12 13:26:25 CEST 2019	Agt1 Bromeliaceae BLAST	2.35e-138	true	99.8%
		BE302_Canistropsis correia-araujoi	0	528	2	99.6%	99.6%	51.5%	483096	Thu Sep 12 13:26:25 CEST 2019	Agt1 Bromeliaceae BLAST	2.35e-138	true	99.8%
	BE458_Nidularium_innocentii	MegaBLAST results - only first 10 hits shown	# Nucleotide Sequences With Mates	# Nucleotides	# Sequences	% Identical Sites	% Pairwise Identity	%GC	Bit-Score	Created Date	Database	E Value	Free end gaps	Grade
		BE583_Neoregelia_pascoaliana	0	528	2	100.0%	100.0%	51.5%	488636	Thu Sep 12 13:26:42 CEST 2019	Agt1 Bromeliaceae BLAST	5.05e-140	true	100.0%
		BE578_Neoregelia_tenebrosa	0	528	2	100.0%	100.0%	51.5%	488636	Thu Sep 12 13:26:42 CEST 2019	Agt1 Bromeliaceae BLAST	5.05e-140	true	100.0%
		BE489_Eduandrea_selloana	0	528	2	100.0%	100.0%	51.5%	488636	Thu Sep 12 13:26:42 CEST 2019	Agt1 Bromeliaceae BLAST	5.05e-140	true	100.0%
		BE488_Neoregelia_pineliana	0	528	2	100.0%	100.0%	51.5%	488636	Thu Sep 12 13:26:42 CEST 2019	Agt1 Bromeliaceae BLAST	5.05e-140	true	100.0%
		BE482_Edmundoa_ambigua	0	528	2	100.0%	100.0%	51.5%	488636	Thu Sep 12 13:26:42 CEST 2019	Agt1 Bromeliaceae BLAST	5.05e-140	true	100.0%
		BE458_Nidularium_innocentii	0	528	2	100.0%	100.0%	51.5%	488636	Thu Sep 12 13:26:43 CEST 2019	Agt1 Bromeliaceae BLAST	5.05e-140	true	100.0%
		BE360_Edmundoa_lindenii	0	528	2	100.0%	100.0%	51.5%	488636	Thu Sep 12 13:26:43 CEST 2019	Agt1 Bromeliaceae BLAST	5.05e-140	true	100.0%
		BE302_Canistropsis correia-araujoi	0	528	2	100.0%	100.0%	51.5%	488636	Thu Sep 12 13:26:43 CEST 2019	Agt1 Bromeliaceae BLAST	5.05e-140	true	100.0%
		BE175_Wittrockia_gigantea	0	528	2	100.0%	100.0%	51.5%	488636	Thu Sep 12 13:26:43 CEST 2019	Agt1 Bromeliaceae BLAST	5.05e-140	true	100.0%
		BE172_Neoregelia_cruenta	0	528	2	100.0%	100.0%	51.5%	488636	Thu Sep 12 13:26:43 CEST 2019	Agt1 Bromeliaceae BLAST	5.05e-140	true	100.0%
	BE433_Aechmea_abbreviata	MegaBLAST results - only first 10 hits shown	# Nucleotide Sequences With Mates	# Nucleotides	# Sequences	% Identical Sites	% Pairwise Identity	%GC	Bit-Score	Created Date	Database	E Value	Free end gaps	Grade
		BE547_Aechmea_tillandsioides	0	528	2	98.9%	99.4%	52.7%	477556	Thu Sep 12 13:22:56 CEST 2019	Agt1 Bromeliaceae BLAST	1.09e-136	true	99.7%
		BE538_Aechmea_abbreviata	0	528	2	98.9%	99.4%	53.0%	477556	Thu Sep 12 13:22:56 CEST 2019	Agt1 Bromeliaceae BLAST	1.09e-136	true	99.7%
		BE502_Aechmea_cucullata	0	528	2	98.9%	99.4%	52.7%	477556	Thu Sep 12 13:22:56 CEST 2019	Agt1 Bromeliaceae BLAST	1.09e-136	true	99.7%
		BE437_Aechmea_angustifolia	0	528	2	98.9%	99.4%	52.7%	477556	Thu Sep 12 13:22:56 CEST 2019	Agt1 Bromeliaceae BLAST	1.09e-136	true	99.7%
		BE433_Aechmea_abbreviata	0	528	2	100.0%	99.4%	53.1%	477556	Thu Sep 12 13:22:57 CEST 2019	Agt1 Bromeliaceae BLAST	1.09e-136	true	99.7%
		BE402_Aechmea_roeseliae	0	528	2	98.9%	99.4%	52.7%	477556	Thu Sep 12 13:22:57 CEST 2019	Agt1 Bromeliaceae BLAST	1.09e-136	true	99.7%
		BE044_Aechmea_tessmannii	0	528	2	98.9%	99.4%	52.7%	477556	Thu Sep 12 13:22:57 CEST 2019	Agt1 Bromeliaceae BLAST	1.09e-136	true	99.7%
		BE041_Aechmea_chantinii	0	528	2	98.9%	99.4%	52.7%	477556	Thu Sep 12 13:22:57 CEST 2019	Agt1 Bromeliaceae BLAST	1.09e-136	true	99.7%
		BE474_Aechmea_contracta	0	528	2	98.5%	99.2%	52.9%	473863	Thu Sep 12 13:22:57 CEST 2019	Agt1 Bromeliaceae BLAST	1.42e-135	true	99.6%
		BE444_Aechmea_moorei	0	528	2	98.5%	99.2%	52.9%	473863	Thu Sep 12 13:22:57 CEST 2019	Agt1 Bromeliaceae BLAST	1.42e-135	true	99.6%
	BE463_Neoregelia_lactea	MegaBLAST results - only first 10 hits shown	# Nucleotide Sequences With Mates	# Nucleotides	# Sequences	% Identical Sites	% Pairwise Identity	%GC	Bit-Score	Created Date	Database	E Value	Free end gaps	Grade
		BE624_Neoregelia_lymaniana	0	528	2	100.0%	100.0%	51.9%	488636	Thu Sep 12 13:26:59 CEST 2019	Agt1 Bromeliaceae BLAST	5.05e-140	true	100.0%
		BE623_Neoregelia_lactea	0	528	2	100.0%	100.0%	51.9%	488636	Thu Sep 12 13:26:59 CEST 2019	Agt1 Bromeliaceae BLAST	5.05e-140	true	100.0%
		BE616_Neoregelia_viridovinosa	0	528	2	100.0%	100.0%	51.9%	488636	Thu Sep 12 13:26:59 CEST 2019	Agt1 Bromeliaceae BLAST	5.05e-140	true	100.0%
		BE563_Neoregelia_retrorsa	0	528	2	100.0%	100.0%	51.9%	488636	Thu Sep 12 13:26:59 CEST 2019	Agt1 Bromeliaceae BLAST	5.05e-140	true	100.0%
		BE558_Neoregelia_rothinessa	0	528	2	100.0%	100.0%	51.9%	488636	Thu Sep 12 13:26:59 CEST 2019	Agt1 Bromeliaceae BLAST	5.05e-140	true	100.0%
		BE463_Neoregelia_lactea	0	528	2	100.0%	100.0%	51.9%	488636	Thu Sep 12 13:26:59 CEST 2019	Agt1 Bromeliaceae BLAST	5.05e-140	true	100.0%
		BE583_Neoregelia_pascoaliana	0	528	2	99.6%	99.6%	51.5%	483096	Thu Sep 12 13:26:59 CEST 2019	Agt1 Bromeliaceae BLAST	2.35e-138	true	99.8%
		BE578_Neoregelia_tenebrosa	0	528	2	99.6%	99.6%	51.5%	483096	Thu Sep 12 13:26:59 CEST 2019	Agt1 Bromeliaceae BLAST	2.35e-138	true	99.8%
		BE489_Eduandrea_selloana	0	528	2	99.6%	99.6%	51.5%	483096	Thu Sep 12 13:26:59 CEST 2019	Agt1 Bromeliaceae BLAST	2.35e-138	true	99.8%
		BE488_Neoregelia_pineliana	0	528	2	99.6%	99.6%	51.5%	483096	Thu Sep 12 13:26:59 CEST 2019	Agt1 Bromeliaceae BLAST	2.35e-138	true	99.8%
	BE442_Hohenbergiopsis_guatemalensis	MegaBLAST results - only first 10 hits shown	# Nucleotide Sequences With Mates	# Nucleotides	# Sequences	% Identical Sites	% Pairwise Identity	%GC	Bit-Score	Created Date	Database	E Value	Free end gaps	Grade
		BE442_Hohenbergiopsis_guatemalensis	0	528	2	100.0%	100.0%	51.9%	488636	Thu Sep 12 13:27:12 CEST 2019	Agt1 Bromeliaceae BLAST	5.05e-140	true	100.0%
		BE606_Androlepis_fragrans	0	528	2	99.2%	99.2%	51.1%	477556	Thu Sep 12 13:27:12 CEST 2019	Agt1 Bromeliaceae BLAST	1.09e-136	true	99.6%
		BE570_Hohenbergiopsis_guatemalensis	0	528	2	99.2%	99.2%	51.9%	477556	Thu Sep 12 13:27:12 CEST 2019	Agt1 Bromeliaceae BLAST	1.09e-136	true	99.6%
		BE455_Ursulaea_tuitensis	0	528	2	99.2%	99.2%	51.1%	477556	Thu Sep 12 13:27:12 CEST 2019	Agt1 Bromeliaceae BLAST	1.09e-136	true	99.6%
		BE166_Aechmea_saxicola	0	528	2	99.2%	99.2%	51.1%	477556	Thu Sep 12 13:27:12 CEST 2019	Agt1 Bromeliaceae BLAST	1.09e-136	true	99.6%
		BE040_Aechmea_lueddemanniana	0	528	2	99.2%	99.2%	51.1%	477556	Thu Sep 12 13:27:12 CEST 2019	Agt1 Bromeliaceae BLAST	1.09e-136	true	99.6%
		BE027_Aechmea_pectinata	0	528	2	99.2%	99.2%	51.1%	477556	Thu Sep 12 13:27:12 CEST 2019	Agt1 Bromeliaceae BLAST	1.09e-136	true	99.6%
		BE580_Billbergia_seidelii	0	528	2	98.9%	99.1%	52.1%	473863	Thu Sep 12 13:27:12 CEST 2019	Agt1 Bromeliaceae BLAST	1.42e-135	true	99.5%
		BE460_Aechmea mariae-reginae	0	528	2	98.9%	99.1%	51.3%	473863	Thu Sep 12 13:27:12 CEST 2019	Agt1 Bromeliaceae BLAST	1.42e-135	true	99.5%
		BE270_Aechmea_depressa	0	528	2	98.9%	99.1%	51.0%	473863	Thu Sep 12 13:27:12 CEST 2019	Agt1 Bromeliaceae BLAST	1.42e-135	true	99.5%
	BE127_Aechmea_marauensis	MegaBLAST results - only first 10 hits shown	# Nucleotide Sequences With Mates	# Nucleotides	# Sequences	% Identical Sites	% Pairwise Identity	%GC	Bit-Score	Created Date	Database	E Value	Free end gaps	Grade
		BE575_Aechmea_ramosa	0	528	2	99.2%	99.6%	52.7%	481249	Thu Sep 12 13:27:48 CEST 2019	Agt1 Bromeliaceae BLAST	8.46e-138	true	99.8%
		BE523_Hohenbergia_burle-marxii	0	528	2	99.2%	99.6%	52.7%	481249	Thu Sep 12 13:27:48 CEST 2019	Agt1 Bromeliaceae BLAST	8.46e-138	true	99.8%
		BE413_Portea_filifera	0	528	2	99.2%	99.6%	52.7%	481249	Thu Sep 12 13:27:48 CEST 2019	Agt1 Bromeliaceae BLAST	8.46e-138	true	99.8%
		BE391_Aechmea_marauensis	0	528	2	99.2%	99.6%	53.0%	481249	Thu Sep 12 13:27:48 CEST 2019	Agt1 Bromeliaceae BLAST	8.46e-138	true	99.8%
		BE358_Hohenbergia_stellata	0	528	2	99.2%	99.6%	52.7%	481249	Thu Sep 12 13:27:48 CEST 2019	Agt1 Bromeliaceae BLAST	8.46e-138	true	99.8%
		BE233_Hohenbergia_stellata	0	528	2	99.2%	99.6%	52.7%	481249	Thu Sep 12 13:27:48 CEST 2019	Agt1 Bromeliaceae BLAST	8.46e-138	true	99.8%
		BE229_Hohenbergia_loredanoana	0	528	2	99.2%	99.6%	52.7%	481249	Thu Sep 12 13:27:48 CEST 2019	Agt1 Bromeliaceae BLAST	8.46e-138	true	99.8%
		BE198_Aechmea_racinae	0	528	2	99.2%	99.6%	52.7%	481249	Thu Sep 12 13:27:48 CEST 2019	Agt1 Bromeliaceae BLAST	8.46e-138	true	99.8%
		BE184_Portea_grandiflora	0	528	2	99.6%	99.6%	52.9%	481249	Thu Sep 12 13:27:48 CEST 2019	Agt1 Bromeliaceae BLAST	8.46e-138	true	99.8%
		BE182_Portea_kermesina	0	528	2	99.2%	99.6%	52.7%	481249	Thu Sep 12 13:27:48 CEST 2019	Agt1 Bromeliaceae BLAST	8.46e-138	true	99.8%
	BE507_Aechmea_disjuncta	MegaBLAST results - only first 10 hits shown	# Nucleotide Sequences With Mates	# Nucleotides	# Sequences	% Identical Sites	% Pairwise Identity	%GC	Bit-Score	Created Date	Database	E Value	Free end gaps	Grade
		BE507_Aechmea_disjuncta	0	528	2	100.0%	100.0%	52.3%	488636	Thu Sep 12 13:29:15 CEST 2019	Agt1 Bromeliaceae BLAST	5.05e-140	true	100.0%
		BE630_Quesnelia_edmundoi_var_rubrobracteata	0	528	2	99.6%	99.6%	51.9%	483096	Thu Sep 12 13:29:15 CEST 2019	Agt1 Bromeliaceae BLAST	2.35e-138	true	99.8%
		BE620_Aechmea_fosteriana_var_rupicola	0	528	2	99.6%	99.6%	51.9%	483096	Thu Sep 12 13:29:15 CEST 2019	Agt1 Bromeliaceae BLAST	2.35e-138	true	99.8%
		BE540_Aechmea_weilbachii_var_albipetala	0	528	2	99.6%	99.6%	51.9%	483096	Thu Sep 12 13:29:15 CEST 2019	Agt1 Bromeliaceae BLAST	2.35e-138	true	99.8%
		BE498_Aechmea_rubroaristata	0	528	2	99.6%	99.6%	51.9%	483096	Thu Sep 12 13:29:15 CEST 2019	Agt1 Bromeliaceae BLAST	2.35e-138	true	99.8%
		BE384_Aechmea_mutica	0	528	2	99.6%	99.6%	51.9%	483096	Thu Sep 12 13:29:15 CEST 2019	Agt1 Bromeliaceae BLAST	2.35e-138	true	99.8%
		BE094_Quesnelia_lateralis	0	528	2	99.6%	99.6%	51.9%	483096	Thu Sep 12 13:29:15 CEST 2019	Agt1 Bromeliaceae BLAST	2.35e-138	true	99.8%
		BE074_Aechmea_bambusoides	0	528	2	99.6%	99.6%	51.9%	483096	Thu Sep 12 13:29:15 CEST 2019	Agt1 Bromeliaceae BLAST	2.35e-138	true	99.8%
		BE061_Canistrum_auratum	0	528	2	99.6%	99.6%	52.7%	483096	Thu Sep 12 13:29:15 CEST 2019	Agt1 Bromeliaceae BLAST	2.35e-138	true	99.8%
		BE049_Quesnelia_edmundoi_var_rubrobracteata	0	528	2	99.6%	99.6%	51.9%	483096	Thu Sep 12 13:29:15 CEST 2019	Agt1 Bromeliaceae BLAST	2.35e-138	true	99.8%
	BE636_Ronnbergia_silvana	MegaBLAST results - only first 10 hits shown	# Nucleotide Sequences With Mates	# Nucleotides	# Sequences	% Identical Sites	% Pairwise Identity	%GC	Bit-Score	Created Date	Database	E Value	Free end gaps	Grade
		BE636_Ronnbergia_silvana	0	528	2	100.0%	100.0%	52.7%	488636	Thu Sep 12 13:30:28 CEST 2019	Agt1 Bromeliaceae BLAST	5.05e-140	true	100.0%
		BE548_Wittmackia_ituberaensis	0	528	2	99.2%	99.2%	52.3%	477556	Thu Sep 12 13:30:28 CEST 2019	Agt1 Bromeliaceae BLAST	1.09e-136	true	99.6%
		BE521_Wittmackia_tentaculifera	0	528	2	99.2%	99.2%	52.3%	477556	Thu Sep 12 13:30:28 CEST 2019	Agt1 Bromeliaceae BLAST	1.09e-136	true	99.6%
		BE231_Ronnbergia_silvana	0	528	2	99.2%	99.2%	52.3%	477556	Thu Sep 12 13:30:28 CEST 2019	Agt1 Bromeliaceae BLAST	1.09e-136	true	99.6%
		BE435_Aechmea_allenii	0	528	2	98.9%	98.9%	51.5%	472016	Thu Sep 12 13:30:28 CEST 2019	Agt1 Bromeliaceae BLAST	5.09e-135	true	99.4%
		BE606_Androlepis_fragrans	0	528	2	98.5%	98.5%	51.1%	466476	Thu Sep 12 13:30:28 CEST 2019	Agt1 Bromeliaceae BLAST	2.37e-133	true	99.2%
		BE575_Aechmea_ramosa	0	528	2	98.5%	98.5%	52.7%	466476	Thu Sep 12 13:30:28 CEST 2019	Agt1 Bromeliaceae BLAST	2.37e-133	true	99.2%
		BE570_Hohenbergiopsis_guatemalensis	0	528	2	98.5%	98.5%	51.9%	466476	Thu Sep 12 13:30:28 CEST 2019	Agt1 Bromeliaceae BLAST	2.37e-133	true	99.2%
		BE523_Hohenbergia_burle-marxii	0	528	2	98.5%	98.5%	52.7%	466476	Thu Sep 12 13:30:28 CEST 2019	Agt1 Bromeliaceae BLAST	2.37e-133	true	99.2%
		BE455_Ursulaea_tuitensis	0	528	2	98.5%	98.5%	51.1%	466476	Thu Sep 12 13:30:28 CEST 2019	Agt1 Bromeliaceae BLAST	2.37e-133	true	99.2%
	BRC041_Catopsis floribunda	MegaBLAST results - only first 10 hits shown	# Nucleotide Sequences With Mates	# Nucleotides	# Sequences	% Identical Sites	% Pairwise Identity	%GC	Bit-Score	Created Date	Database	E Value	Free end gaps	Grade
		BRC234_Catopsis morreniana	0	528	2	100.0%	100.0%	51.1%	488636	Thu Sep 12 13:31:33 CEST 2019	Agt1 Bromeliaceae BLAST	5.05e-140	true	100.0%
		BRC046_Catopsis sessiliflora	0	528	2	100.0%	100.0%	51.1%	488636	Thu Sep 12 13:31:33 CEST 2019	Agt1 Bromeliaceae BLAST	5.05e-140	true	100.0%
		BRC042_Catopsis floribunda	0	528	2	100.0%	100.0%	51.1%	488636	Thu Sep 12 13:31:33 CEST 2019	Agt1 Bromeliaceae BLAST	5.05e-140	true	100.0%
		BRC041_Catopsis floribunda	0	528	2	100.0%	100.0%	51.1%	488636	Thu Sep 12 13:31:33 CEST 2019	Agt1 Bromeliaceae BLAST	5.05e-140	true	100.0%
		BRC243_Tillandsia delicatula	0	528	2	99.6%	99.8%	51.3%	484943	Thu Sep 12 13:31:33 CEST 2019	Agt1 Bromeliaceae BLAST	6.54e-139	true	99.9%
		BRC199_Catopsis minimiflora	0	528	2	99.6%	99.8%	51.0%	484943	Thu Sep 12 13:31:33 CEST 2019	Agt1 Bromeliaceae BLAST	6.54e-139	true	99.9%
		BRC284_Tillandsia juncifolia	0	528	2	99.6%	99.6%	51.5%	483096	Thu Sep 12 13:31:33 CEST 2019	Agt1 Bromeliaceae BLAST	2.35e-138	true	99.8%
		BRC045_Catopsis nutans	0	528	2	99.6%	99.6%	51.5%	483096	Thu Sep 12 13:31:33 CEST 2019	Agt1 Bromeliaceae BLAST	2.35e-138	true	99.8%
		BRC195_Catopsis subulata	0	528	2	99.2%	99.2%	51.9%	477556	Thu Sep 12 13:31:33 CEST 2019	Agt1 Bromeliaceae BLAST	1.09e-136	true	99.6%
		BRC044_Catopsis nutans	0	528	2	99.2%	99.2%	51.9%	477556	Thu Sep 12 13:31:33 CEST 2019	Agt1 Bromeliaceae BLAST	1.09e-136	true	99.6%
	BRC314_Tillandsia muhriae	MegaBLAST results - only first 10 hits shown	# Nucleotide Sequences With Mates	# Nucleotides	# Sequences	% Identical Sites	% Pairwise Identity	%GC	Bit-Score	Created Date	Database	E Value	Free end gaps	Grade
		BRC460_Tillandsia streptocarpa	0	528	2	100.0%	100.0%	49.2%	488636	Thu Sep 12 13:32:15 CEST 2019	Agt1 Bromeliaceae BLAST	5.05e-140	true	100.0%
		BRC424_Tillandsia capillaris	0	528	2	100.0%	100.0%	49.2%	488636	Thu Sep 12 13:32:15 CEST 2019	Agt1 Bromeliaceae BLAST	5.05e-140	true	100.0%
		BRC420_Tillandsia capillaris	0	528	2	100.0%	100.0%	49.2%	488636	Thu Sep 12 13:32:15 CEST 2019	Agt1 Bromeliaceae BLAST	5.05e-140	true	100.0%
		BRC416_Tillandsia capillaris	0	528	2	100.0%	100.0%	49.2%	488636	Thu Sep 12 13:32:15 CEST 2019	Agt1 Bromeliaceae BLAST	5.05e-140	true	100.0%
		BRC403_Tillandsia usneoides	0	528	2	100.0%	100.0%	49.2%	488636	Thu Sep 12 13:32:15 CEST 2019	Agt1 Bromeliaceae BLAST	5.05e-140	true	100.0%
		BRC402_Tillandsia usneoides	0	528	2	100.0%	100.0%	49.2%	488636	Thu Sep 12 13:32:15 CEST 2019	Agt1 Bromeliaceae BLAST	5.05e-140	true	100.0%
		BRC400_Tillandsia usneoides	0	528	2	100.0%	100.0%	49.2%	488636	Thu Sep 12 13:32:15 CEST 2019	Agt1 Bromeliaceae BLAST	5.05e-140	true	100.0%
		BRC399_Tillandsia usneoides	0	528	2	100.0%	100.0%	49.2%	488636	Thu Sep 12 13:32:15 CEST 2019	Agt1 Bromeliaceae BLAST	5.05e-140	true	100.0%
		BRC398_Tillandsia usneoides	0	528	2	100.0%	100.0%	49.2%	488636	Thu Sep 12 13:32:15 CEST 2019	Agt1 Bromeliaceae BLAST	5.05e-140	true	100.0%
		BRC395_Tillandsia usneoides	0	528	2	100.0%	100.0%	49.2%	488636	Thu Sep 12 13:32:15 CEST 2019	Agt1 Bromeliaceae BLAST	5.05e-140	true	100.0%
	BE413_Portea_filifera	MegaBLAST results - only first 10 hits shown	# Nucleotide Sequences With Mates	# Nucleotides	# Sequences	% Identical Sites	% Pairwise Identity	%GC	Bit-Score	Created Date	Database	E Value	Free end gaps	Grade
		BE575_Aechmea_ramosa	0	528	2	100.0%	100.0%	52.7%	488636	Thu Sep 12 13:19:10 CEST 2019	Agt1 Bromeliaceae BLAST	5.05e-140	true	100.0%
		BE523_Hohenbergia_burle-marxii	0	528	2	100.0%	100.0%	52.7%	488636	Thu Sep 12 13:19:10 CEST 2019	Agt1 Bromeliaceae BLAST	5.05e-140	true	100.0%
		BE413_Portea_filifera	0	528	2	100.0%	100.0%	52.7%	488636	Thu Sep 12 13:19:11 CEST 2019	Agt1 Bromeliaceae BLAST	5.05e-140	true	100.0%
		BE358_Hohenbergia_stellata	0	528	2	100.0%	100.0%	52.7%	488636	Thu Sep 12 13:19:11 CEST 2019	Agt1 Bromeliaceae BLAST	5.05e-140	true	100.0%
		BE233_Hohenbergia_stellata	0	528	2	100.0%	100.0%	52.7%	488636	Thu Sep 12 13:19:11 CEST 2019	Agt1 Bromeliaceae BLAST	5.05e-140	true	100.0%
		BE229_Hohenbergia_loredanoana	0	528	2	100.0%	100.0%	52.7%	488636	Thu Sep 12 13:19:11 CEST 2019	Agt1 Bromeliaceae BLAST	5.05e-140	true	100.0%
		BE198_Aechmea_racinae	0	528	2	100.0%	100.0%	52.7%	488636	Thu Sep 12 13:19:11 CEST 2019	Agt1 Bromeliaceae BLAST	5.05e-140	true	100.0%
		BE182_Portea_kermesina	0	528	2	100.0%	100.0%	52.7%	488636	Thu Sep 12 13:19:11 CEST 2019	Agt1 Bromeliaceae BLAST	5.05e-140	true	100.0%
		BE101_Aechmea_aquilega	0	528	2	100.0%	100.0%	52.7%	488636	Thu Sep 12 13:19:11 CEST 2019	Agt1 Bromeliaceae BLAST	5.05e-140	true	100.0%
		BE090_Aechmea_guainumbiorum	0	528	2	100.0%	100.0%	52.7%	488636	Thu Sep 12 13:19:11 CEST 2019	Agt1 Bromeliaceae BLAST	5.05e-140	true	100.0%
	BRC382_Tillandsia landbeckii	MegaBLAST results - only first 10 hits shown	# Nucleotide Sequences With Mates	# Nucleotides	# Sequences	% Identical Sites	% Pairwise Identity	%GC	Bit-Score	Created Date	Database	E Value	Free end gaps	Grade
		BRC460_Tillandsia streptocarpa	0	528	2	100.0%	100.0%	49.2%	488636	Thu Sep 12 13:19:35 CEST 2019	Agt1 Bromeliaceae BLAST	5.05e-140	true	100.0%
		BRC424_Tillandsia capillaris	0	528	2	100.0%	100.0%	49.2%	488636	Thu Sep 12 13:19:35 CEST 2019	Agt1 Bromeliaceae BLAST	5.05e-140	true	100.0%
		BRC420_Tillandsia capillaris	0	528	2	100.0%	100.0%	49.2%	488636	Thu Sep 12 13:19:35 CEST 2019	Agt1 Bromeliaceae BLAST	5.05e-140	true	100.0%
		BRC416_Tillandsia capillaris	0	528	2	100.0%	100.0%	49.2%	488636	Thu Sep 12 13:19:35 CEST 2019	Agt1 Bromeliaceae BLAST	5.05e-140	true	100.0%
		BRC403_Tillandsia usneoides	0	528	2	100.0%	100.0%	49.2%	488636	Thu Sep 12 13:19:35 CEST 2019	Agt1 Bromeliaceae BLAST	5.05e-140	true	100.0%
		BRC402_Tillandsia usneoides	0	528	2	100.0%	100.0%	49.2%	488636	Thu Sep 12 13:19:35 CEST 2019	Agt1 Bromeliaceae BLAST	5.05e-140	true	100.0%
		BRC400_Tillandsia usneoides	0	528	2	100.0%	100.0%	49.2%	488636	Thu Sep 12 13:19:35 CEST 2019	Agt1 Bromeliaceae BLAST	5.05e-140	true	100.0%
		BRC399_Tillandsia usneoides	0	528	2	100.0%	100.0%	49.2%	488636	Thu Sep 12 13:19:35 CEST 2019	Agt1 Bromeliaceae BLAST	5.05e-140	true	100.0%
		BRC398_Tillandsia usneoides	0	528	2	100.0%	100.0%	49.2%	488636	Thu Sep 12 13:19:35 CEST 2019	Agt1 Bromeliaceae BLAST	5.05e-140	true	100.0%
		BRC395_Tillandsia usneoides	0	528	2	100.0%	100.0%	49.2%	488636	Thu Sep 12 13:19:35 CEST 2019	Agt1 Bromeliaceae BLAST	5.05e-140	true	100.0%
	BRC420_Tillandsia capillaris	MegaBLAST results - only first 10 hits shown	# Nucleotide Sequences With Mates	# Nucleotides	# Sequences	% Identical Sites	% Pairwise Identity	%GC	Bit-Score	Created Date	Database	E Value	Free end gaps	Grade
		BRC460_Tillandsia streptocarpa	0	528	2	100.0%	100.0%	49.2%	488636	Thu Sep 12 13:20:28 CEST 2019	Agt1 Bromeliaceae BLAST	5.05e-140	true	100.0%
		BRC424_Tillandsia capillaris	0	528	2	100.0%	100.0%	49.2%	488636	Thu Sep 12 13:20:28 CEST 2019	Agt1 Bromeliaceae BLAST	5.05e-140	true	100.0%
		BRC420_Tillandsia capillaris	0	528	2	100.0%	100.0%	49.2%	488636	Thu Sep 12 13:20:28 CEST 2019	Agt1 Bromeliaceae BLAST	5.05e-140	true	100.0%
		BRC416_Tillandsia capillaris	0	528	2	100.0%	100.0%	49.2%	488636	Thu Sep 12 13:20:28 CEST 2019	Agt1 Bromeliaceae BLAST	5.05e-140	true	100.0%
		BRC403_Tillandsia usneoides	0	528	2	100.0%	100.0%	49.2%	488636	Thu Sep 12 13:20:28 CEST 2019	Agt1 Bromeliaceae BLAST	5.05e-140	true	100.0%
		BRC402_Tillandsia usneoides	0	528	2	100.0%	100.0%	49.2%	488636	Thu Sep 12 13:20:28 CEST 2019	Agt1 Bromeliaceae BLAST	5.05e-140	true	100.0%
		BRC400_Tillandsia usneoides	0	528	2	100.0%	100.0%	49.2%	488636	Thu Sep 12 13:20:29 CEST 2019	Agt1 Bromeliaceae BLAST	5.05e-140	true	100.0%
		BRC399_Tillandsia usneoides	0	528	2	100.0%	100.0%	49.2%	488636	Thu Sep 12 13:20:29 CEST 2019	Agt1 Bromeliaceae BLAST	5.05e-140	true	100.0%
		BRC398_Tillandsia usneoides	0	528	2	100.0%	100.0%	49.2%	488636	Thu Sep 12 13:20:29 CEST 2019	Agt1 Bromeliaceae BLAST	5.05e-140	true	100.0%
		BRC395_Tillandsia usneoides	0	528	2	100.0%	100.0%	49.2%	488636	Thu Sep 12 13:20:29 CEST 2019	Agt1 Bromeliaceae BLAST	5.05e-140	true	100.0%
	BE101_Aechmea_aquilega	MegaBLAST results - only first 10 hits shown	# Nucleotide Sequences With Mates	# Nucleotides	# Sequences	% Identical Sites	% Pairwise Identity	%GC	Bit-Score	Created Date	Database	E Value	Free end gaps	Grade
		BE575_Aechmea_ramosa	0	528	2	100.0%	100.0%	52.7%	488636	Thu Sep 12 13:21:04 CEST 2019	Agt1 Bromeliaceae BLAST	5.05e-140	true	100.0%
		BE523_Hohenbergia_burle-marxii	0	528	2	100.0%	100.0%	52.7%	488636	Thu Sep 12 13:21:04 CEST 2019	Agt1 Bromeliaceae BLAST	5.05e-140	true	100.0%
		BE413_Portea_filifera	0	528	2	100.0%	100.0%	52.7%	488636	Thu Sep 12 13:21:04 CEST 2019	Agt1 Bromeliaceae BLAST	5.05e-140	true	100.0%
		BE358_Hohenbergia_stellata	0	528	2	100.0%	100.0%	52.7%	488636	Thu Sep 12 13:21:04 CEST 2019	Agt1 Bromeliaceae BLAST	5.05e-140	true	100.0%
		BE233_Hohenbergia_stellata	0	528	2	100.0%	100.0%	52.7%	488636	Thu Sep 12 13:21:04 CEST 2019	Agt1 Bromeliaceae BLAST	5.05e-140	true	100.0%
		BE229_Hohenbergia_loredanoana	0	528	2	100.0%	100.0%	52.7%	488636	Thu Sep 12 13:21:04 CEST 2019	Agt1 Bromeliaceae BLAST	5.05e-140	true	100.0%
		BE198_Aechmea_racinae	0	528	2	100.0%	100.0%	52.7%	488636	Thu Sep 12 13:21:04 CEST 2019	Agt1 Bromeliaceae BLAST	5.05e-140	true	100.0%
		BE182_Portea_kermesina	0	528	2	100.0%	100.0%	52.7%	488636	Thu Sep 12 13:21:04 CEST 2019	Agt1 Bromeliaceae BLAST	5.05e-140	true	100.0%
		BE101_Aechmea_aquilega	0	528	2	100.0%	100.0%	52.7%	488636	Thu Sep 12 13:21:04 CEST 2019	Agt1 Bromeliaceae BLAST	5.05e-140	true	100.0%
		BE090_Aechmea_guainumbiorum	0	528	2	100.0%	100.0%	52.7%	488636	Thu Sep 12 13:21:04 CEST 2019	Agt1 Bromeliaceae BLAST	5.05e-140	true	100.0%
	BE481_Canistrum_aurantiacum	MegaBLAST results - only first 10 hits shown	# Nucleotide Sequences With Mates	# Nucleotides	# Sequences	% Identical Sites	% Pairwise Identity	%GC	Bit-Score	Created Date	Database	E Value	Free end gaps	Grade
		BE575_Aechmea_ramosa	0	528	2	99.6%	99.8%	52.7%	484943	Thu Sep 12 13:21:35 CEST 2019	Agt1 Bromeliaceae BLAST	6.54e-139	true	99.9%
		BE523_Hohenbergia_burle-marxii	0	528	2	99.6%	99.8%	52.7%	484943	Thu Sep 12 13:21:36 CEST 2019	Agt1 Bromeliaceae BLAST	6.54e-139	true	99.9%
		BE481_Canistrum_aurantiacum	0	528	2	100.0%	99.8%	52.9%	484943	Thu Sep 12 13:21:36 CEST 2019	Agt1 Bromeliaceae BLAST	6.54e-139	true	99.9%
		BE413_Portea_filifera	0	528	2	99.6%	99.8%	52.7%	484943	Thu Sep 12 13:21:36 CEST 2019	Agt1 Bromeliaceae BLAST	6.54e-139	true	99.9%
		BE358_Hohenbergia_stellata	0	528	2	99.6%	99.8%	52.7%	484943	Thu Sep 12 13:21:36 CEST 2019	Agt1 Bromeliaceae BLAST	6.54e-139	true	99.9%
		BE233_Hohenbergia_stellata	0	528	2	99.6%	99.8%	52.7%	484943	Thu Sep 12 13:21:36 CEST 2019	Agt1 Bromeliaceae BLAST	6.54e-139	true	99.9%
		BE229_Hohenbergia_loredanoana	0	528	2	99.6%	99.8%	52.7%	484943	Thu Sep 12 13:21:36 CEST 2019	Agt1 Bromeliaceae BLAST	6.54e-139	true	99.9%
		BE198_Aechmea_racinae	0	528	2	99.6%	99.8%	52.7%	484943	Thu Sep 12 13:21:36 CEST 2019	Agt1 Bromeliaceae BLAST	6.54e-139	true	99.9%
		BE182_Portea_kermesina	0	528	2	99.6%	99.8%	52.7%	484943	Thu Sep 12 13:21:36 CEST 2019	Agt1 Bromeliaceae BLAST	6.54e-139	true	99.9%
		BE101_Aechmea_aquilega	0	528	2	99.6%	99.8%	52.7%	484943	Thu Sep 12 13:21:36 CEST 2019	Agt1 Bromeliaceae BLAST	6.54e-139	true	99.9%
	BRC452_Tillandsia xiphioides	MegaBLAST results - only first 10 hits shown	# Nucleotide Sequences With Mates	# Nucleotides	# Sequences	% Identical Sites	% Pairwise Identity	%GC	Bit-Score	Created Date	Database	E Value	Free end gaps	Grade
		BRC452_Tillandsia xiphioides	0	516	2	100.0%	100.0%	48.1%	477556	Thu Sep 12 13:21:59 CEST 2019	Agt1 Bromeliaceae BLAST	1.09e-136	true	98.9%
		BRC319_Tillandsia chiletensis	0	516	2	100.0%	100.0%	48.1%	477556	Thu Sep 12 13:21:59 CEST 2019	Agt1 Bromeliaceae BLAST	1.09e-136	true	98.9%
		BRC456_Tillandsia xiphioides	0	516	2	99.6%	99.6%	48.4%	472016	Thu Sep 12 13:21:59 CEST 2019	Agt1 Bromeliaceae BLAST	5.09e-135	true	98.7%
		BRC264_Tillandsia cardenasii	0	516	2	99.2%	99.6%	48.0%	470169	Thu Sep 12 13:21:59 CEST 2019	Agt1 Bromeliaceae BLAST	1.83e-134	true	98.7%
		BRC390_Tillandsia hegeri	0	516	2	99.2%	99.4%	48.2%	468323	Thu Sep 12 13:21:59 CEST 2019	Agt1 Bromeliaceae BLAST	6.58e-134	true	98.6%
		BRC347_Tillandsia bermejoensis	0	516	2	99.2%	99.4%	48.4%	468323	Thu Sep 12 13:21:59 CEST 2019	Agt1 Bromeliaceae BLAST	6.58e-134	true	98.6%
		BRC336_Tillandsia neglecta	0	516	2	99.2%	99.4%	48.6%	468323	Thu Sep 12 13:21:59 CEST 2019	Agt1 Bromeliaceae BLAST	6.58e-134	true	98.6%
		BRC281_Tillandsia lorentziana	0	516	2	99.2%	99.4%	48.6%	468323	Thu Sep 12 13:21:59 CEST 2019	Agt1 Bromeliaceae BLAST	6.58e-134	true	98.6%
		BRC435_Tillandsia nana	0	516	2	99.2%	99.2%	48.8%	466476	Thu Sep 12 13:21:59 CEST 2019	Agt1 Bromeliaceae BLAST	2.37e-133	true	98.5%
		BRC418_Tillandsia aizoides	0	516	2	99.2%	99.2%	48.4%	466476	Thu Sep 12 13:21:59 CEST 2019	Agt1 Bromeliaceae BLAST	2.37e-133	true	98.5%
	BE437_Aechmea_angustifolia	MegaBLAST results - only first 10 hits shown	# Nucleotide Sequences With Mates	# Nucleotides	# Sequences	% Identical Sites	% Pairwise Identity	%GC	Bit-Score	Created Date	Database	E Value	Free end gaps	Grade
		BE547_Aechmea_tillandsioides	0	528	2	100.0%	100.0%	52.7%	488636	Thu Sep 12 13:23:21 CEST 2019	Agt1 Bromeliaceae BLAST	5.05e-140	true	100.0%
		BE502_Aechmea_cucullata	0	528	2	100.0%	100.0%	52.7%	488636	Thu Sep 12 13:23:21 CEST 2019	Agt1 Bromeliaceae BLAST	5.05e-140	true	100.0%
		BE437_Aechmea_angustifolia	0	528	2	100.0%	100.0%	52.7%	488636	Thu Sep 12 13:23:21 CEST 2019	Agt1 Bromeliaceae BLAST	5.05e-140	true	100.0%
		BE402_Aechmea_roeseliae	0	528	2	100.0%	100.0%	52.7%	488636	Thu Sep 12 13:23:21 CEST 2019	Agt1 Bromeliaceae BLAST	5.05e-140	true	100.0%
		BE044_Aechmea_tessmannii	0	528	2	100.0%	100.0%	52.7%	488636	Thu Sep 12 13:23:21 CEST 2019	Agt1 Bromeliaceae BLAST	5.05e-140	true	100.0%
		BE474_Aechmea_contracta	0	528	2	99.6%	99.8%	52.9%	484943	Thu Sep 12 13:23:21 CEST 2019	Agt1 Bromeliaceae BLAST	6.54e-139	true	99.9%
		BE444_Aechmea_moorei	0	528	2	99.6%	99.8%	52.9%	484943	Thu Sep 12 13:23:21 CEST 2019	Agt1 Bromeliaceae BLAST	6.54e-139	true	99.9%
		BE449_Aechmea_hoppii	0	528	2	99.6%	99.6%	52.3%	483096	Thu Sep 12 13:23:21 CEST 2019	Agt1 Bromeliaceae BLAST	2.35e-138	true	99.8%
		BE041_Aechmea_chantinii	0	528	2	99.6%	99.6%	52.7%	483096	Thu Sep 12 13:23:21 CEST 2019	Agt1 Bromeliaceae BLAST	2.35e-138	true	99.8%
		BE531_Aechmea_hoppii	0	528	2	99.2%	99.4%	52.3%	479403	Thu Sep 12 13:23:21 CEST 2019	Agt1 Bromeliaceae BLAST	3.04e-137	true	99.7%
	BE360_Edmundoa_lindenii	MegaBLAST results - only first 10 hits shown	# Nucleotide Sequences With Mates	# Nucleotides	# Sequences	% Identical Sites	% Pairwise Identity	%GC	Bit-Score	Created Date	Database	E Value	Free end gaps	Grade
		BE583_Neoregelia_pascoaliana	0	528	2	100.0%	100.0%	51.5%	488636	Thu Sep 12 13:26:06 CEST 2019	Agt1 Bromeliaceae BLAST	5.05e-140	true	100.0%
		BE578_Neoregelia_tenebrosa	0	528	2	100.0%	100.0%	51.5%	488636	Thu Sep 12 13:26:06 CEST 2019	Agt1 Bromeliaceae BLAST	5.05e-140	true	100.0%
		BE489_Eduandrea_selloana	0	528	2	100.0%	100.0%	51.5%	488636	Thu Sep 12 13:26:06 CEST 2019	Agt1 Bromeliaceae BLAST	5.05e-140	true	100.0%
		BE488_Neoregelia_pineliana	0	528	2	100.0%	100.0%	51.5%	488636	Thu Sep 12 13:26:06 CEST 2019	Agt1 Bromeliaceae BLAST	5.05e-140	true	100.0%
		BE482_Edmundoa_ambigua	0	528	2	100.0%	100.0%	51.5%	488636	Thu Sep 12 13:26:06 CEST 2019	Agt1 Bromeliaceae BLAST	5.05e-140	true	100.0%
		BE458_Nidularium_innocentii	0	528	2	100.0%	100.0%	51.5%	488636	Thu Sep 12 13:26:06 CEST 2019	Agt1 Bromeliaceae BLAST	5.05e-140	true	100.0%
		BE360_Edmundoa_lindenii	0	528	2	100.0%	100.0%	51.5%	488636	Thu Sep 12 13:26:06 CEST 2019	Agt1 Bromeliaceae BLAST	5.05e-140	true	100.0%
		BE302_Canistropsis correia-araujoi	0	528	2	100.0%	100.0%	51.5%	488636	Thu Sep 12 13:26:06 CEST 2019	Agt1 Bromeliaceae BLAST	5.05e-140	true	100.0%
		BE175_Wittrockia_gigantea	0	528	2	100.0%	100.0%	51.5%	488636	Thu Sep 12 13:26:06 CEST 2019	Agt1 Bromeliaceae BLAST	5.05e-140	true	100.0%
		BE172_Neoregelia_cruenta	0	528	2	100.0%	100.0%	51.5%	488636	Thu Sep 12 13:26:06 CEST 2019	Agt1 Bromeliaceae BLAST	5.05e-140	true	100.0%
	BE174_Aechmea_nudicaulis	MegaBLAST results - only first 10 hits shown	# Nucleotide Sequences With Mates	# Nucleotides	# Sequences	% Identical Sites	% Pairwise Identity	%GC	Bit-Score	Created Date	Database	E Value	Free end gaps	Grade
		BE174_Aechmea_nudicaulis	0	528	2	100.0%	99.6%	52.7%	481249	Thu Sep 12 13:28:18 CEST 2019	Agt1 Bromeliaceae BLAST	8.46e-138	true	99.8%
		BRC428_Aechmea nudicaulis	0	528	2	98.9%	99.2%	52.7%	475709	Thu Sep 12 13:28:18 CEST 2019	Agt1 Bromeliaceae BLAST	3.93e-136	true	99.6%
		BE645_Araeococcus_parviflorus	0	528	2	98.9%	99.2%	52.3%	475709	Thu Sep 12 13:28:18 CEST 2019	Agt1 Bromeliaceae BLAST	3.93e-136	true	99.6%
		BE630_Quesnelia_edmundoi_var_rubrobracteata	0	528	2	98.9%	99.2%	51.9%	475709	Thu Sep 12 13:28:18 CEST 2019	Agt1 Bromeliaceae BLAST	3.93e-136	true	99.6%
		BE620_Aechmea_fosteriana_var_rupicola	0	528	2	98.9%	99.2%	51.9%	475709	Thu Sep 12 13:28:18 CEST 2019	Agt1 Bromeliaceae BLAST	3.93e-136	true	99.6%
		BE540_Aechmea_weilbachii_var_albipetala	0	528	2	98.9%	99.2%	51.9%	475709	Thu Sep 12 13:28:18 CEST 2019	Agt1 Bromeliaceae BLAST	3.93e-136	true	99.6%
		BE498_Aechmea_rubroaristata	0	528	2	98.9%	99.2%	51.9%	475709	Thu Sep 12 13:28:18 CEST 2019	Agt1 Bromeliaceae BLAST	3.93e-136	true	99.6%
		BE384_Aechmea_mutica	0	528	2	98.9%	99.2%	51.9%	475709	Thu Sep 12 13:28:18 CEST 2019	Agt1 Bromeliaceae BLAST	3.93e-136	true	99.6%
		BE377_Billbergia_elegans	0	528	2	98.9%	99.2%	52.3%	475709	Thu Sep 12 13:28:18 CEST 2019	Agt1 Bromeliaceae BLAST	3.93e-136	true	99.6%
		BE376_Billbergia_nana	0	528	2	98.9%	99.2%	52.3%	475709	Thu Sep 12 13:28:19 CEST 2019	Agt1 Bromeliaceae BLAST	3.93e-136	true	99.6%
	BE542_Aechmea_weilbachii_var_weilbachii_forma_viridisepala	MegaBLAST results - only first 10 hits shown	# Nucleotide Sequences With Mates	# Nucleotides	# Sequences	% Identical Sites	% Pairwise Identity	%GC	Bit-Score	Created Date	Database	E Value	Free end gaps	Grade
		BE630_Quesnelia_edmundoi_var_rubrobracteata	0	528	2	99.2%	99.6%	51.9%	481249	Thu Sep 12 13:29:46 CEST 2019	Agt1 Bromeliaceae BLAST	8.46e-138	true	99.8%
		BE620_Aechmea_fosteriana_var_rupicola	0	528	2	99.2%	99.6%	51.9%	481249	Thu Sep 12 13:29:46 CEST 2019	Agt1 Bromeliaceae BLAST	8.46e-138	true	99.8%
		BE542_Aechmea_weilbachii_var_weilbachii_forma_viridisepala	0	528	2	100.0%	99.6%	51.9%	481249	Thu Sep 12 13:29:46 CEST 2019	Agt1 Bromeliaceae BLAST	8.46e-138	true	99.8%
		BE540_Aechmea_weilbachii_var_albipetala	0	528	2	99.2%	99.6%	51.9%	481249	Thu Sep 12 13:29:46 CEST 2019	Agt1 Bromeliaceae BLAST	8.46e-138	true	99.8%
		BE498_Aechmea_rubroaristata	0	528	2	99.2%	99.6%	51.9%	481249	Thu Sep 12 13:29:46 CEST 2019	Agt1 Bromeliaceae BLAST	8.46e-138	true	99.8%
		BE384_Aechmea_mutica	0	528	2	99.2%	99.6%	51.9%	481249	Thu Sep 12 13:29:46 CEST 2019	Agt1 Bromeliaceae BLAST	8.46e-138	true	99.8%
		BE094_Quesnelia_lateralis	0	528	2	99.2%	99.6%	51.9%	481249	Thu Sep 12 13:29:46 CEST 2019	Agt1 Bromeliaceae BLAST	8.46e-138	true	99.8%
		BE074_Aechmea_bambusoides	0	528	2	99.2%	99.6%	51.9%	481249	Thu Sep 12 13:29:46 CEST 2019	Agt1 Bromeliaceae BLAST	8.46e-138	true	99.8%
		BE049_Quesnelia_edmundoi_var_rubrobracteata	0	528	2	99.2%	99.6%	51.9%	481249	Thu Sep 12 13:29:46 CEST 2019	Agt1 Bromeliaceae BLAST	8.46e-138	true	99.8%
		BE545_Aechmea_weilbachii_var_weilbachii_forma_pendula	0	528	2	99.2%	99.4%	52.3%	477556	Thu Sep 12 13:29:46 CEST 2019	Agt1 Bromeliaceae BLAST	1.09e-136	true	99.7%
	BE453_Wittmackia_lingulata	MegaBLAST results - only first 10 hits shown	# Nucleotide Sequences With Mates	# Nucleotides	# Sequences	% Identical Sites	% Pairwise Identity	%GC	Bit-Score	Created Date	Database	E Value	Free end gaps	Grade
		BE453_Wittmackia_lingulata	0	528	2	100.0%	100.0%	51.5%	488636	Thu Sep 12 13:27:31 CEST 2019	Agt1 Bromeliaceae BLAST	5.05e-140	true	100.0%
		BE415_Wittmackia_lingulatoides	0	528	2	100.0%	100.0%	51.5%	488636	Thu Sep 12 13:27:31 CEST 2019	Agt1 Bromeliaceae BLAST	5.05e-140	true	100.0%
		BE401_Wittmackia_turbinocalyx	0	528	2	100.0%	100.0%	51.5%	488636	Thu Sep 12 13:27:31 CEST 2019	Agt1 Bromeliaceae BLAST	5.05e-140	true	100.0%
		BE392_Wittmackia_amorimii	0	528	2	100.0%	100.0%	51.5%	488636	Thu Sep 12 13:27:31 CEST 2019	Agt1 Bromeliaceae BLAST	5.05e-140	true	100.0%
		BE386_Wittmackia_incompta	0	528	2	100.0%	100.0%	51.5%	488636	Thu Sep 12 13:27:31 CEST 2019	Agt1 Bromeliaceae BLAST	5.05e-140	true	100.0%
		BE250_Wittmackia_sulbahianensis	0	528	2	100.0%	100.0%	51.5%	488636	Thu Sep 12 13:27:31 CEST 2019	Agt1 Bromeliaceae BLAST	5.05e-140	true	100.0%
		BE156_Wittmackia_lingulata	0	528	2	100.0%	100.0%	51.5%	488636	Thu Sep 12 13:27:31 CEST 2019	Agt1 Bromeliaceae BLAST	5.05e-140	true	100.0%
		BE408_Ronnbergia_fraseri	0	528	2	99.6%	99.8%	51.3%	484943	Thu Sep 12 13:27:31 CEST 2019	Agt1 Bromeliaceae BLAST	6.54e-139	true	99.9%
		BE398_Wittmackia_pernambucentris	0	528	2	99.6%	99.6%	51.1%	483096	Thu Sep 12 13:27:31 CEST 2019	Agt1 Bromeliaceae BLAST	2.35e-138	true	99.8%
		BE331_Wittmackia_froesii	0	528	2	99.6%	99.6%	51.1%	483096	Thu Sep 12 13:27:31 CEST 2019	Agt1 Bromeliaceae BLAST	2.35e-138	true	99.8%
	BRC098_Pitcairnia wendlandii	MegaBLAST results - only first 10 hits shown	# Nucleotide Sequences With Mates	# Nucleotides	# Sequences	% Identical Sites	% Pairwise Identity	%GC	Bit-Score	Created Date	Database	E Value	Free end gaps	Grade
		BRC098_Pitcairnia wendlandii	0	528	2	100.0%	100.0%	50.4%	488636	Thu Sep 12 14:03:02 CEST 2019	Agt1 Bromeliaceae BLAST	5.05e-140	true	100.0%
		BRC070_Pitcairnia wendlandii	0	528	2	100.0%	100.0%	50.4%	488636	Thu Sep 12 14:03:02 CEST 2019	Agt1 Bromeliaceae BLAST	5.05e-140	true	100.0%
		BRC103_Pitcairnia atrorubens	0	508	2	100.0%	100.0%	50.4%	470169	Thu Sep 12 14:03:02 CEST 2019	Agt1 Bromeliaceae BLAST	1.83e-134	true	98.1%
		BRC115_Pitcairnia rexiflora	0	528	2	98.5%	98.5%	50.4%	466476	Thu Sep 12 14:03:02 CEST 2019	Agt1 Bromeliaceae BLAST	2.37e-133	true	99.2%
		BRC113_Picairnia nigra	0	528	2	98.5%	98.5%	50.4%	466476	Thu Sep 12 14:03:02 CEST 2019	Agt1 Bromeliaceae BLAST	2.37e-133	true	99.2%
		BRC133_Pitcairnia prolifera	0	528	2	98.1%	98.1%	49.2%	460936	Thu Sep 12 14:03:02 CEST 2019	Agt1 Bromeliaceae BLAST	1.10e-131	true	99.1%
		BRC122_Pitcairnia elliptica	0	528	2	98.1%	98.1%	49.2%	460936	Thu Sep 12 14:03:02 CEST 2019	Agt1 Bromeliaceae BLAST	1.10e-131	true	99.1%
		BRC119_Pitcairnia elvirae	0	528	2	98.1%	98.1%	49.2%	460936	Thu Sep 12 14:03:02 CEST 2019	Agt1 Bromeliaceae BLAST	1.10e-131	true	99.1%
		BRC108_Pitcairnia carnososepala	0	528	2	98.1%	98.1%	49.2%	460936	Thu Sep 12 14:03:02 CEST 2019	Agt1 Bromeliaceae BLAST	1.10e-131	true	99.1%
		BRC032_Pitcairnia corallina	0	528	2	98.1%	98.1%	50.8%	460936	Thu Sep 12 14:03:03 CEST 2019	Agt1 Bromeliaceae BLAST	1.10e-131	true	99.1%
	BRC396_Tillandsia usneoides	MegaBLAST results - only first 10 hits shown	# Nucleotide Sequences With Mates	# Nucleotides	# Sequences	% Identical Sites	% Pairwise Identity	%GC	Bit-Score	Created Date	Database	E Value	Free end gaps	Grade
		BRC396_Tillandsia usneoides	0	528	2	100.0%	100.0%	48.9%	488636	Thu Sep 12 13:20:05 CEST 2019	Agt1 Bromeliaceae BLAST	5.05e-140	true	100.0%
		BRC460_Tillandsia streptocarpa	0	528	2	99.6%	99.6%	49.2%	483096	Thu Sep 12 13:20:05 CEST 2019	Agt1 Bromeliaceae BLAST	2.35e-138	true	99.8%
		BRC424_Tillandsia capillaris	0	528	2	99.6%	99.6%	49.2%	483096	Thu Sep 12 13:20:06 CEST 2019	Agt1 Bromeliaceae BLAST	2.35e-138	true	99.8%
		BRC420_Tillandsia capillaris	0	528	2	99.6%	99.6%	49.2%	483096	Thu Sep 12 13:20:06 CEST 2019	Agt1 Bromeliaceae BLAST	2.35e-138	true	99.8%
		BRC416_Tillandsia capillaris	0	528	2	99.6%	99.6%	49.2%	483096	Thu Sep 12 13:20:06 CEST 2019	Agt1 Bromeliaceae BLAST	2.35e-138	true	99.8%
		BRC403_Tillandsia usneoides	0	528	2	99.6%	99.6%	49.2%	483096	Thu Sep 12 13:20:06 CEST 2019	Agt1 Bromeliaceae BLAST	2.35e-138	true	99.8%
		BRC402_Tillandsia usneoides	0	528	2	99.6%	99.6%	49.2%	483096	Thu Sep 12 13:20:06 CEST 2019	Agt1 Bromeliaceae BLAST	2.35e-138	true	99.8%
		BRC400_Tillandsia usneoides	0	528	2	99.6%	99.6%	49.2%	483096	Thu Sep 12 13:20:06 CEST 2019	Agt1 Bromeliaceae BLAST	2.35e-138	true	99.8%
		BRC399_Tillandsia usneoides	0	528	2	99.6%	99.6%	49.2%	483096	Thu Sep 12 13:20:06 CEST 2019	Agt1 Bromeliaceae BLAST	2.35e-138	true	99.8%
		BRC398_Tillandsia usneoides	0	528	2	99.6%	99.6%	49.2%	483096	Thu Sep 12 13:20:06 CEST 2019	Agt1 Bromeliaceae BLAST	2.35e-138	true	99.8%
	BE233_Hohenbergia_stellata	MegaBLAST results - only first 10 hits shown	# Nucleotide Sequences With Mates	# Nucleotides	# Sequences	% Identical Sites	% Pairwise Identity	%GC	Bit-Score	Created Date	Database	E Value	Free end gaps	Grade
		BE575_Aechmea_ramosa	0	528	2	100.0%	100.0%	52.7%	488636	Thu Sep 12 13:23:44 CEST 2019	Agt1 Bromeliaceae BLAST	5.05e-140	true	100.0%
		BE523_Hohenbergia_burle-marxii	0	528	2	100.0%	100.0%	52.7%	488636	Thu Sep 12 13:23:44 CEST 2019	Agt1 Bromeliaceae BLAST	5.05e-140	true	100.0%
		BE413_Portea_filifera	0	528	2	100.0%	100.0%	52.7%	488636	Thu Sep 12 13:23:44 CEST 2019	Agt1 Bromeliaceae BLAST	5.05e-140	true	100.0%
		BE358_Hohenbergia_stellata	0	528	2	100.0%	100.0%	52.7%	488636	Thu Sep 12 13:23:44 CEST 2019	Agt1 Bromeliaceae BLAST	5.05e-140	true	100.0%
		BE233_Hohenbergia_stellata	0	528	2	100.0%	100.0%	52.7%	488636	Thu Sep 12 13:23:44 CEST 2019	Agt1 Bromeliaceae BLAST	5.05e-140	true	100.0%
		BE229_Hohenbergia_loredanoana	0	528	2	100.0%	100.0%	52.7%	488636	Thu Sep 12 13:23:44 CEST 2019	Agt1 Bromeliaceae BLAST	5.05e-140	true	100.0%
		BE198_Aechmea_racinae	0	528	2	100.0%	100.0%	52.7%	488636	Thu Sep 12 13:23:44 CEST 2019	Agt1 Bromeliaceae BLAST	5.05e-140	true	100.0%
		BE182_Portea_kermesina	0	528	2	100.0%	100.0%	52.7%	488636	Thu Sep 12 13:23:44 CEST 2019	Agt1 Bromeliaceae BLAST	5.05e-140	true	100.0%
		BE101_Aechmea_aquilega	0	528	2	100.0%	100.0%	52.7%	488636	Thu Sep 12 13:23:44 CEST 2019	Agt1 Bromeliaceae BLAST	5.05e-140	true	100.0%
		BE090_Aechmea_guainumbiorum	0	528	2	100.0%	100.0%	52.7%	488636	Thu Sep 12 13:23:44 CEST 2019	Agt1 Bromeliaceae BLAST	5.05e-140	true	100.0%
	BE377_Billbergia_elegans	MegaBLAST results - only first 10 hits shown	# Nucleotide Sequences With Mates	# Nucleotides	# Sequences	% Identical Sites	% Pairwise Identity	%GC	Bit-Score	Created Date	Database	E Value	Free end gaps	Grade
		BE645_Araeococcus_parviflorus	0	528	2	100.0%	100.0%	52.3%	488636	Thu Sep 12 13:25:25 CEST 2019	Agt1 Bromeliaceae BLAST	5.05e-140	true	100.0%
		BE377_Billbergia_elegans	0	528	2	100.0%	100.0%	52.3%	488636	Thu Sep 12 13:25:25 CEST 2019	Agt1 Bromeliaceae BLAST	5.05e-140	true	100.0%
		BE376_Billbergia_nana	0	528	2	100.0%	100.0%	52.3%	488636	Thu Sep 12 13:25:25 CEST 2019	Agt1 Bromeliaceae BLAST	5.05e-140	true	100.0%
		BE292_Quesnelia_clavata	0	528	2	100.0%	100.0%	52.3%	488636	Thu Sep 12 13:25:25 CEST 2019	Agt1 Bromeliaceae BLAST	5.05e-140	true	100.0%
		BE580_Billbergia_seidelii	0	528	2	99.6%	99.8%	52.1%	484943	Thu Sep 12 13:25:25 CEST 2019	Agt1 Bromeliaceae BLAST	6.54e-139	true	99.9%
		BE457_Billbergia_euphemiae	0	528	2	99.6%	99.8%	52.1%	484943	Thu Sep 12 13:25:25 CEST 2019	Agt1 Bromeliaceae BLAST	6.54e-139	true	99.9%
		BE257_Araeococcus chlorocarpus	0	528	2	99.6%	99.8%	52.1%	484943	Thu Sep 12 13:25:25 CEST 2019	Agt1 Bromeliaceae BLAST	6.54e-139	true	99.9%
		BE630_Quesnelia_edmundoi_var_rubrobracteata	0	528	2	99.6%	99.6%	51.9%	483096	Thu Sep 12 13:25:25 CEST 2019	Agt1 Bromeliaceae BLAST	2.35e-138	true	99.8%
		BE620_Aechmea_fosteriana_var_rupicola	0	528	2	99.6%	99.6%	51.9%	483096	Thu Sep 12 13:25:25 CEST 2019	Agt1 Bromeliaceae BLAST	2.35e-138	true	99.8%
		BE584_Billbergia_horrida	0	528	2	99.6%	99.6%	51.9%	483096	Thu Sep 12 13:25:25 CEST 2019	Agt1 Bromeliaceae BLAST	2.35e-138	true	99.8%
	BE464_Billbergia_vittata	MegaBLAST results - only first 10 hits shown	# Nucleotide Sequences With Mates	# Nucleotides	# Sequences	% Identical Sites	% Pairwise Identity	%GC	Bit-Score	Created Date	Database	E Value	Free end gaps	Grade
		BE464_Billbergia_vittata	0	528	2	100.0%	99.2%	52.9%	473863	Thu Sep 12 13:25:42 CEST 2019	Agt1 Bromeliaceae BLAST	1.42e-135	true	99.6%
		BE645_Araeococcus_parviflorus	0	528	2	98.1%	98.9%	52.3%	468323	Thu Sep 12 13:25:42 CEST 2019	Agt1 Bromeliaceae BLAST	6.58e-134	true	99.4%
		BE377_Billbergia_elegans	0	528	2	98.1%	98.9%	52.3%	468323	Thu Sep 12 13:25:42 CEST 2019	Agt1 Bromeliaceae BLAST	6.58e-134	true	99.4%
		BE376_Billbergia_nana	0	528	2	98.1%	98.9%	52.3%	468323	Thu Sep 12 13:25:42 CEST 2019	Agt1 Bromeliaceae BLAST	6.58e-134	true	99.4%
		BE292_Quesnelia_clavata	0	528	2	98.1%	98.9%	52.3%	468323	Thu Sep 12 13:25:42 CEST 2019	Agt1 Bromeliaceae BLAST	6.58e-134	true	99.4%
		BE580_Billbergia_seidelii	0	528	2	97.7%	98.7%	52.1%	464629	Thu Sep 12 13:25:42 CEST 2019	Agt1 Bromeliaceae BLAST	8.52e-133	true	99.3%
		BE457_Billbergia_euphemiae	0	528	2	97.7%	98.7%	52.1%	464629	Thu Sep 12 13:25:42 CEST 2019	Agt1 Bromeliaceae BLAST	8.52e-133	true	99.3%
		BE257_Araeococcus chlorocarpus	0	528	2	97.7%	98.7%	52.1%	464629	Thu Sep 12 13:25:42 CEST 2019	Agt1 Bromeliaceae BLAST	8.52e-133	true	99.3%
		BE630_Quesnelia_edmundoi_var_rubrobracteata	0	528	2	97.7%	98.5%	51.9%	462783	Thu Sep 12 13:25:42 CEST 2019	Agt1 Bromeliaceae BLAST	3.06e-132	true	99.2%
		BE620_Aechmea_fosteriana_var_rupicola	0	528	2	97.7%	98.5%	51.9%	462783	Thu Sep 12 13:25:42 CEST 2019	Agt1 Bromeliaceae BLAST	3.06e-132	true	99.2%
	BE575_Aechmea_ramosa	MegaBLAST results - only first 10 hits shown	# Nucleotide Sequences With Mates	# Nucleotides	# Sequences	% Identical Sites	% Pairwise Identity	%GC	Bit-Score	Created Date	Database	E Value	Free end gaps	Grade
		BE575_Aechmea_ramosa	0	528	2	99.6%	99.8%	52.7%	484943	Thu Sep 12 13:24:04 CEST 2019	Agt1 Bromeliaceae BLAST	6.54e-139	true	99.9%
		BE574_Aechmea_ramosa_var_festiva	0	528	2	100.0%	99.8%	52.9%	484943	Thu Sep 12 13:24:04 CEST 2019	Agt1 Bromeliaceae BLAST	6.54e-139	true	99.9%
		BE523_Hohenbergia_burle-marxii	0	528	2	99.6%	99.8%	52.7%	484943	Thu Sep 12 13:24:04 CEST 2019	Agt1 Bromeliaceae BLAST	6.54e-139	true	99.9%
		BE413_Portea_filifera	0	528	2	99.6%	99.8%	52.7%	484943	Thu Sep 12 13:24:05 CEST 2019	Agt1 Bromeliaceae BLAST	6.54e-139	true	99.9%
		BE358_Hohenbergia_stellata	0	528	2	99.6%	99.8%	52.7%	484943	Thu Sep 12 13:24:05 CEST 2019	Agt1 Bromeliaceae BLAST	6.54e-139	true	99.9%
		BE233_Hohenbergia_stellata	0	528	2	99.6%	99.8%	52.7%	484943	Thu Sep 12 13:24:05 CEST 2019	Agt1 Bromeliaceae BLAST	6.54e-139	true	99.9%
		BE229_Hohenbergia_loredanoana	0	528	2	99.6%	99.8%	52.7%	484943	Thu Sep 12 13:24:05 CEST 2019	Agt1 Bromeliaceae BLAST	6.54e-139	true	99.9%
		BE198_Aechmea_racinae	0	528	2	99.6%	99.8%	52.7%	484943	Thu Sep 12 13:24:05 CEST 2019	Agt1 Bromeliaceae BLAST	6.54e-139	true	99.9%
		BE182_Portea_kermesina	0	528	2	99.6%	99.8%	52.7%	484943	Thu Sep 12 13:24:05 CEST 2019	Agt1 Bromeliaceae BLAST	6.54e-139	true	99.9%
		BE101_Aechmea_aquilega	0	528	2	99.6%	99.8%	52.7%	484943	Thu Sep 12 13:24:05 CEST 2019	Agt1 Bromeliaceae BLAST	6.54e-139	true	99.9%
	BE526_Aechmea_roberto_seidelii	MegaBLAST results - only first 10 hits shown	# Nucleotide Sequences With Mates	# Nucleotides	# Sequences	% Identical Sites	% Pairwise Identity	%GC	Bit-Score	Created Date	Database	Description	E Value	Free end gaps
		BE559_Aechmea_roberto_seodelii	0	528	2	99.6%	99.8%	52.7%	484943	Thu Sep 12 13:29:30 CEST 2019	Agt1 Bromeliaceae BLAST		6.54e-139	true
		BE526_Aechmea_roberto_seidelii	0	528	2	100.0%	99.8%	52.9%	484943	Thu Sep 12 13:29:30 CEST 2019	Agt1 Bromeliaceae BLAST		6.54e-139	true
		BE468_Aechmea_chlorophylla	0	528	2	99.6%	99.8%	53.0%	484943	Thu Sep 12 13:29:30 CEST 2019	Agt1 Bromeliaceae BLAST		6.54e-139	true
		BE092_Portea_nana	0	528	2	99.2%	99.6%	52.9%	481249	Thu Sep 12 13:29:30 CEST 2019	Agt1 Bromeliaceae BLAST		8.46e-138	true
AMBIGUOUS		BE575_Aechmea_ramosa	0	528	2	99.2%	99.4%	52.7%	479403	Thu Sep 12 13:29:30 CEST 2019	Agt1 Bromeliaceae BLAST		3.04e-137	true
		BE523_Hohenbergia_burle-marxii	0	528	2	99.2%	99.4%	52.7%	479403	Thu Sep 12 13:29:30 CEST 2019	Agt1 Bromeliaceae BLAST		3.04e-137	true
		BE413_Portea_filifera	0	528	2	99.2%	99.4%	52.7%	479403	Thu Sep 12 13:29:30 CEST 2019	Agt1 Bromeliaceae BLAST		3.04e-137	true
		BE410_Aechmea_bruggeri	0	528	2	99.2%	99.4%	52.3%	479403	Thu Sep 12 13:29:30 CEST 2019	Agt1 Bromeliaceae BLAST		3.04e-137	true
		BE358_Hohenbergia_stellata	0	528	2	99.2%	99.4%	52.7%	479403	Thu Sep 12 13:29:30 CEST 2019	Agt1 Bromeliaceae BLAST		3.04e-137	true
		BE233_Hohenbergia_stellata	0	528	2	99.2%	99.4%	52.7%	479403	Thu Sep 12 13:29:30 CEST 2019	Agt1 Bromeliaceae BLAST		3.04e-137	true
	BRC441_Tillandsia distichia	MegaBLAST results - only first 10 hits shown	# Nucleotide Sequences With Mates	# Nucleotides	# Sequences	% Identical Sites	% Pairwise Identity	%GC	Bit-Score	Created Date	Database	E Value	Free end gaps	Grade
		BRC441_Tillandsia distichia	0	522	2	100.0%	100.0%	48.7%	483096	Thu Sep 12 13:25:06 CEST 2019	Agt1 Bromeliaceae BLAST	2.35e-138	true	99.4%
		BRC445_Tillandsia distichia	0	522	2	99.6%	99.6%	48.7%	477556	Thu Sep 12 13:25:06 CEST 2019	Agt1 Bromeliaceae BLAST	1.09e-136	true	99.2%
		BRC444_Tillandsia distichia	0	522	2	99.6%	99.6%	48.7%	477556	Thu Sep 12 13:25:06 CEST 2019	Agt1 Bromeliaceae BLAST	1.09e-136	true	99.2%
		BRC326_Tillandsia distichia	0	522	2	99.6%	99.6%	48.7%	477556	Thu Sep 12 13:25:06 CEST 2019	Agt1 Bromeliaceae BLAST	1.09e-136	true	99.2%
		BRC457_Tillandsia bagua-grandensis	0	522	2	99.2%	99.4%	49.0%	473863	Thu Sep 12 13:25:06 CEST 2019	Agt1 Bromeliaceae BLAST	1.42e-135	true	99.1%
		BRC448_Tillandsia distichia	0	518	2	99.6%	99.6%	48.6%	473863	Thu Sep 12 13:25:06 CEST 2019	Agt1 Bromeliaceae BLAST	1.42e-135	true	98.9%
		BRC446_Tillandsia distichia	0	522	2	99.2%	99.4%	48.5%	473863	Thu Sep 12 13:25:06 CEST 2019	Agt1 Bromeliaceae BLAST	1.42e-135	true	99.1%
		BRC442_Tillandsia distichia	0	522	2	99.2%	99.2%	48.3%	472016	Thu Sep 12 13:25:06 CEST 2019	Agt1 Bromeliaceae BLAST	5.09e-135	true	99.0%
		BRC440_Tillandsia distichia	0	522	2	99.2%	99.2%	48.3%	472016	Thu Sep 12 13:25:07 CEST 2019	Agt1 Bromeliaceae BLAST	5.09e-135	true	99.0%
		BRC435_Tillandsia nana	0	522	2	99.2%	99.2%	49.0%	472016	Thu Sep 12 13:25:07 CEST 2019	Agt1 Bromeliaceae BLAST	5.09e-135	true	99.0%
	BE500_Ananas_ananassioides	MegaBLAST results - only first 10 hits shown	# Nucleotide Sequences With Mates	# Nucleotides	# Sequences	% Identical Sites	% Pairwise Identity	%GC	Bit-Score	Created Date	Database	Description	E Value	Free end gaps
		BE500_Ananas_ananassioides	0	528	2	100.0%	100.0%	50.0%	488636	Thu Sep 12 13:28:56 CEST 2019	Agt1 Bromeliaceae BLAST		5.05e-140	true
		BE495_Ananas_comosus	0	528	2	100.0%	100.0%	50.0%	488636	Thu Sep 12 13:28:56 CEST 2019	Agt1 Bromeliaceae BLAST		5.05e-140	true
		BE210_Ananas_ananassioides	0	528	2	100.0%	100.0%	50.0%	488636	Thu Sep 12 13:28:56 CEST 2019	Agt1 Bromeliaceae BLAST		5.05e-140	true
		BE178_Ananas_fritzmuelleri	0	528	2	100.0%	100.0%	50.0%	488636	Thu Sep 12 13:28:56 CEST 2019	Agt1 Bromeliaceae BLAST		5.05e-140	true
		BE501_Ananas_ananassioides	0	528	2	99.6%	99.8%	49.8%	484943	Thu Sep 12 13:28:56 CEST 2019	Agt1 Bromeliaceae BLAST		6.54e-139	true
		BE499_Ananas_bracteatus	0	528	2	99.6%	99.8%	49.8%	484943	Thu Sep 12 13:28:56 CEST 2019	Agt1 Bromeliaceae BLAST		6.54e-139	true
		BE691_Forzzaea_leopoldo-horstii	0	528	2	99.6%	99.6%	50.4%	483096	Thu Sep 12 13:28:56 CEST 2019	Agt1 Bromeliaceae BLAST		2.35e-138	true
		BE632_Lapanthus_duartei	0	528	2	99.6%	99.6%	50.4%	483096	Thu Sep 12 13:28:56 CEST 2019	Agt1 Bromeliaceae BLAST		2.35e-138	true
		BE633_Lapanthus_itambensis	0	528	2	99.2%	99.4%	50.2%	479403	Thu Sep 12 13:28:56 CEST 2019	Agt1 Bromeliaceae BLAST		3.04e-137	true
		BE276_Neoglaziovia burle-marxii	0	528	2	99.2%	99.4%	50.6%	479403	Thu Sep 12 13:28:56 CEST 2019	Agt1 Bromeliaceae BLAST		3.04e-137	true

## Sheet: matK_BLAST_Search
	Sequence BLASTed against Agt1 Bromeliaceae BLAST Megablast Database	MegaBLAST results - only first 10 hits shown	GeneBank_ID	# Nucleotide Sequences With Mates	# Nucleotides	# Sequences	% Identical Sites	% Pairwise Identity	%GC	Accession	Bit-Score	Common Name	Created Date	Database	E Value	Free end gaps	Genetic Code	Grade
	AY614015 - Brocchinia micrantha	Brocchinia micrantha isolate B150 trnK-UUU gene, partial sequence; and maturase K (matK) gene, complete cds; plastid	KX754117	0	1564	2	100.0%	100.0%	32.4%		1445.2	Cordyline micrantha Baker	Wed Jan 30 09:15:22 CET 2019	matK Extraction I	0	true	Bacterial	100.0%
		Brocchinia micrantha maturase K (matK) gene, partial cds; plastid	HQ180857	0	1564	2	99.1%	99.1%	33.0%		1406.42	plastid Brocchinia micrantha	Wed Jan 30 09:15:22 CET 2019	matK Extraction I	0	true	Bacterial	99.6%
		Brocchinia acuminata isolate F19a tRNA-Lys (trnK) gene, partial sequence; and maturase K (matK) gene, complete cds; chloroplast	EU681908	0	1564	2	99.1%	99.1%	33.0%		1406.42	chloroplast Brocchinia acuminata	Wed Jan 30 09:15:22 CET 2019	matK Extraction I	0	true	Bacterial	99.6%
		Brocchinia tatei MB-116 tRNA-Lys (trnK) gene, partial sequence; and maturase K (matK) gene, complete cds; chloroplast	AY614017	0	1564	2	99.1%	99.1%	32.5%		1406.42	chloroplast Brocchinia tatei	Wed Jan 30 09:15:22 CET 2019	matK Extraction I	0	true	Bacterial	99.6%
		Brocchinia acuminata maturase K (matK) gene, complete cds; chloroplast	AF162228	0	1564	2	99.1%	99.1%	33.0%		1406.42	chloroplast Brocchinia acuminata	Wed Jan 30 09:15:22 CET 2019	matK Extraction I	0	true	Bacterial	99.6%
POSITIVE		Aechmea saxicola voucher Luther 1115 (SEL) trnK gene, partial sequence; and maturase K (matK) gene, complete cds; chloroplast	KU762850_Aechmea saxicola_10_Aechmea_subgen_Chevaliera_group_1	0	1564	2	98.5%	98.5%	33.0%		1378.72	chloroplast Aechmea saxicola	Wed Jan 30 09:15:22 CET 2019	matK Extraction I	0	true	Bacterial	99.2%
		Aechmea saxicola maturase K (matK) gene, complete cds; chloroplast	KU258034_Aechmea saxicola_10_Aechmea_subgen_Chevaliera_group_1	0	1564	2	98.5%	98.5%	33.0%		1378.72	chloroplast Aechmea saxicola	Wed Jan 30 09:15:22 CET 2019	matK Extraction I	0	true	Bacterial	99.2%
		Quesnelia kautskyi maturase K (matK) gene, partial cds; chloroplast	JN202270_Quesnelia kautskyi_18_Billbergia_Quesnelia_subgen_Billbergiopsis_Aechmea_subgen_Aechmea_group	0	1564	2	98.5%	98.5%	33.0%		1378.72	chloroplast Quesnelia kautskyi	Wed Jan 30 09:15:22 CET 2019	matK Extraction I	0	true	Bacterial	99.2%
		Quesnelia kautskyi maturase K (matK) gene, partial cds; chloroplast	JN202269_Quesnelia kautskyi_18_Billbergia_Quesnelia_subgen_Billbergiopsis_Aechmea_subgen_Aechmea_group	0	1564	2	98.5%	98.5%	33.0%		1378.72	chloroplast Quesnelia kautskyi	Wed Jan 30 09:15:22 CET 2019	matK Extraction I	0	true	Bacterial	99.2%
		Billbergia euphemiae maturase K (matK) gene, partial cds; chloroplast	JN202237_Billbergia euphemiae_18_Billbergia_Quesnelia_subgen_Billbergiopsis_Aechmea_subgen_Aechmea_group	0	1564	2	98.5%	98.5%	33.0%		1378.72	chloroplast Billbergia euphemiae	Wed Jan 30 09:15:22 CET 2019	matK Extraction I	0	true	Bacterial	99.2%
		MegaBLAST results - only first 10 hits shown	GeneBank_ID	# Nucleotide Sequences With Mates	# Nucleotides	# Sequences	% Identical Sites	% Pairwise Identity	%GC	Accession	Bit-Score	Common Name	Created Date	Database	E Value	Free end gaps	Genetic Code	Grade
	AY614111 - Tillandsia heterophylla	Tillandsia heterophylla isolate B47 trnK-UUU gene, partial sequence; and maturase K (matK) gene, complete cds; plastid	KX754104	0	1564	2	100.0%	100.0%	32.5%		1445.2	plastid Tillandsia heterophylla	Wed Jan 30 10:41:20 CET 2019	matK Extraction I	0	true	Bacterial	100.0%
		Tillandsia lymanii isolate B1236 trnK-UUU gene, partial sequence; and maturase K (matK) gene, complete cds; plastid	KX754213_Tillandsia lymanii_7_Tillandsia_rauhii_complex	0	1564	2	99.9%	99.9%	32.6%		1439.66	plastid Tillandsia lymanii	Wed Jan 30 10:41:20 CET 2019	matK Extraction I	0	true	Bacterial	99.9%
		Tillandsia teres isolate B201 trnK-UUU gene, partial sequence; and maturase K (matK) gene, complete cds; plastid	KX754124_Tillandsia teres_7_Tillandsia_rauhii_complex	0	1564	2	99.9%	99.9%	32.6%		1439.66	plastid Tillandsia teres	Wed Jan 30 10:41:20 CET 2019	matK Extraction I	0	true	Bacterial	99.9%
		Tillandsia rauhii var. rauhii MB-92 tRNA-Lys (trnK) gene, partial sequence; and maturase K (matK) gene, complete cds; chloroplast	AY614101_Tillandsia rauhii_7_Tillandsia_rauhii_complex	0	1564	2	99.9%	99.9%	32.6%		1439.66	chloroplast Tillandsia rauhii var. rauhii	Wed Jan 30 10:41:20 CET 2019	matK Extraction I	0	true	Bacterial	99.9%
		Tillandsia capillaris isolate B1592 trnK-UUU gene, partial sequence; and maturase K (matK) gene, complete cds; plastid	KX754232_Tillandsia capillaris_1_Tillandsia_subg_Diaphoranthema	0	1564	2	99.7%	99.7%	32.2%		1434.12	plastid Tillandsia capillaris	Wed Jan 30 10:41:20 CET 2019	matK Extraction I	0	true	Bacterial	99.9%
		Tillandsia capillaris isolate B916 trnK-UUU gene, partial sequence; and maturase K (matK) gene, complete cds; plastid	KX754206_Tillandsia capillaris_1_Tillandsia_subg_Diaphoranthema	0	1564	2	99.7%	99.7%	32.2%		1434.12	plastid Tillandsia capillaris	Wed Jan 30 10:41:20 CET 2019	matK Extraction I	0	true	Bacterial	99.9%
		Tillandsia denudata var. vivipara isolate B750 trnK-UUU gene, partial sequence; and maturase K (matK) gene, complete cds; plastid	KX754193	0	1564	2	99.7%	99.7%	32.7%		1434.12	plastid Tillandsia denudata var. vivipara	Wed Jan 30 10:41:20 CET 2019	matK Extraction I	0	true	Bacterial	99.9%
		Tillandsia floribunda isolate B351 trnK-UUU gene, partial sequence; and maturase K (matK) gene, complete cds; plastid	KX754151_Tillandsia floribunda_6_Tillandsia_biflorai_complex	0	1564	2	99.7%	99.7%	32.5%		1434.12	plastid Tillandsia floribunda	Wed Jan 30 10:41:20 CET 2019	matK Extraction I	0	true	Bacterial	99.9%
		Tillandsia heteromorpha isolate B224 trnK-UUU gene, partial sequence; and maturase K (matK) gene, complete cds; plastid	KX754131	0	1564	2	99.7%	99.7%	32.5%		1434.12	plastid Tillandsia heteromorpha	Wed Jan 30 10:41:20 CET 2019	matK Extraction I	0	true	Bacterial	99.9%
		Tillandsia capillaris isolate A47 tRNA-Lys (trnK) gene, intron; and maturase K (matK) gene, complete cds; chloroplast	KU197181_Tillandsia capillaris_1_Tillandsia_subg_Diaphoranthema	0	1564	2	99.7%	99.7%	32.2%		1434.12	chloroplast Tillandsia capillaris	Wed Jan 30 10:41:20 CET 2019	matK Extraction I	0	true	Bacterial	99.9%
		MegaBLAST results - only first 10 hits shown	GeneBank_ID	# Nucleotide Sequences With Mates	# Nucleotides	# Sequences	% Identical Sites	% Pairwise Identity	%GC	Accession	Bit-Score	Common Name	Created Date	Database	E Value	Free end gaps	Genetic Code	Grade
	EU681858 - Fosterella weberbaueri	Fosterella weberbaueri isolate 121a tRNA-Lys (trnK) gene, partial sequence; and maturase K (matK) gene, complete cds; chloroplast	EU681911	0	1564	2	100.0%	100.0%	32.7%		1445.2	chloroplast Fosterella weberbaueri	Wed Jan 30 09:39:10 CET 2019	matK Extraction I	0	true	Bacterial	100.0%
		Fosterella weberbaueri isolate 95c tRNA-Lys (trnK) gene, partial sequence; and maturase K (matK) gene, complete cds; chloroplast	EU681910	0	1564	2	100.0%	100.0%	32.7%		1445.2	chloroplast Fosterella weberbaueri	Wed Jan 30 09:39:10 CET 2019	matK Extraction I	0	true	Bacterial	100.0%
		Fosterella weberbaueri isolate 138b tRNA-Lys (trnK) gene, partial sequence; and maturase K (matK) gene, complete cds; chloroplast	EU681857	0	1564	2	100.0%	100.0%	32.7%		1445.2	chloroplast Fosterella weberbaueri	Wed Jan 30 09:39:10 CET 2019	matK Extraction I	0	true	Bacterial	100.0%
		Fosterella rusbyi isolate B020 tRNA-Lys (trnK) gene, intron; and maturase K (matK) gene, complete cds; chloroplast	HQ167781	0	1564	2	99.0%	99.0%	33.2%		1400.88	chloroplast Fosterella rusbyi	Wed Jan 30 09:39:10 CET 2019	matK Extraction I	0	true	Bacterial	99.5%
		Fosterella petiolata isolate B016 tRNA-Lys (trnK) gene, intron; and maturase K (matK) gene, complete cds; chloroplast	HQ167777	0	1564	2	99.0%	99.0%	33.0%		1400.88	chloroplast Fosterella petiolata	Wed Jan 30 09:39:10 CET 2019	matK Extraction I	0	true	Bacterial	99.5%
		Fosterella christophii isolate B012 tRNA-Lys (trnK) gene, intron; and maturase K (matK) gene, complete cds; chloroplast	HQ167773	0	1564	2	99.0%	99.0%	33.1%		1400.88	chloroplast Fosterella christophii	Wed Jan 30 09:39:10 CET 2019	matK Extraction I	0	true	Bacterial	99.5%
		Fosterella vasquezii isolate 63b tRNA-Lys (trnK) gene, partial sequence; and maturase K (matK) gene, complete cds; chloroplast	EU681856	0	1564	2	99.0%	99.0%	33.2%		1400.88	chloroplast Fosterella vasquezii	Wed Jan 30 09:39:10 CET 2019	matK Extraction I	0	true	Bacterial	99.5%
		Fosterella vasquezii isolate 23a tRNA-Lys (trnK) gene, partial sequence; and maturase K (matK) gene, complete cds; chloroplast	EU681855	0	1564	2	99.0%	99.0%	33.2%		1400.88	chloroplast Fosterella vasquezii	Wed Jan 30 09:39:10 CET 2019	matK Extraction I	0	true	Bacterial	99.5%
		Fosterella rusbyi isolate 60a tRNA-Lys (trnK) gene, partial sequence; and maturase K (matK) gene, complete cds; chloroplast	EU681854	0	1564	2	99.0%	99.0%	33.2%		1400.88	chloroplast Fosterella rusbyi	Wed Jan 30 09:39:10 CET 2019	matK Extraction I	0	true	Bacterial	99.5%
		Fosterella micrantha voucher Salazar-Chavez 7196 tRNA-Lys (trnK) gene, intron; and maturase K (matK) gene, complete cds; chloroplast	KY114864	0	1564	2	98.8%	98.8%	33.1%		1395.34	chloroplast Fosterella micrantha	Wed Jan 30 09:39:10 CET 2019	matK Extraction I	0	true	Bacterial	99.4%
		MegaBLAST results - only first 10 hits shown	GeneBank_ID	# Nucleotide Sequences With Mates	# Nucleotides	# Sequences	% Identical Sites	% Pairwise Identity	%GC	Accession	Bit-Score	Common Name	Created Date	Database	E Value	Free end gaps	Genetic Code	Grade
	EU681880 - Fosterella weddelliana	Fosterella weddelliana isolate 36a tRNA-Lys (trnK) gene, partial sequence; and maturase K (matK) gene, complete cds; chloroplast	EU681881	0	1564	2	100.0%	100.0%	33.0%		1445.2	chloroplast Fosterella weddelliana	Wed Jan 30 09:41:15 CET 2019	matK Extraction I	0	true	Bacterial	100.0%
		Fosterella weddelliana isolate 145a tRNA-Lys (trnK) gene, partial sequence; and maturase K (matK) gene, complete cds; chloroplast	EU681879	0	1564	2	100.0%	100.0%	33.0%		1445.2	chloroplast Fosterella weddelliana	Wed Jan 30 09:41:15 CET 2019	matK Extraction I	0	true	Bacterial	100.0%
		Fosterella weddelliana isolate 37a tRNA-Lys (trnK) gene, partial sequence; and maturase K (matK) gene, complete cds; chloroplast	EU681875	0	1564	2	100.0%	100.0%	33.0%		1445.2	chloroplast Fosterella weddelliana	Wed Jan 30 09:41:15 CET 2019	matK Extraction I	0	true	Bacterial	100.0%
		Fosterella weddelliana isolate 56a tRNA-Lys (trnK) gene, partial sequence; and maturase K (matK) gene, complete cds; chloroplast	EU681882	0	1564	2	99.9%	99.9%	33.0%		1439.66	chloroplast Fosterella weddelliana	Wed Jan 30 09:41:15 CET 2019	matK Extraction I	0	true	Bacterial	99.9%
		Fosterella caulescens maturase K (matK) gene, partial cds; plastid	HQ180866	0	1564	2	99.5%	99.5%	32.7%		1423.04	plastid Fosterella caulescens	Wed Jan 30 09:41:15 CET 2019	matK Extraction I	0	true	Bacterial	99.7%
		Fosterella penduliflora isolate B035 tRNA-Lys (trnK) gene, intron; and maturase K (matK) gene, complete cds; chloroplast	HQ167792	0	1564	2	99.5%	99.5%	32.7%		1423.04	chloroplast Fosterella penduliflora	Wed Jan 30 09:41:15 CET 2019	matK Extraction I	0	true	Bacterial	99.7%
		Fosterella penduliflora isolate B015 tRNA-Lys (trnK) gene, intron; and maturase K (matK) gene, complete cds; chloroplast	HQ167776	0	1564	2	99.5%	99.5%	32.7%		1423.04	chloroplast Fosterella penduliflora	Wed Jan 30 09:41:15 CET 2019	matK Extraction I	0	true	Bacterial	99.7%
		Fosterella penduliflora isolate B014 tRNA-Lys (trnK) gene, intron; and maturase K (matK) gene, complete cds; chloroplast	HQ167775	0	1564	2	99.5%	99.5%	32.7%		1423.04	chloroplast Fosterella penduliflora	Wed Jan 30 09:41:15 CET 2019	matK Extraction I	0	true	Bacterial	99.7%
		Fosterella gracilis isolate 117a tRNA-Lys (trnK) gene, partial sequence; and maturase K (matK) gene, complete cds; chloroplast	EU681923	0	1564	2	99.5%	99.5%	32.7%		1423.04	chloroplast Fosterella gracilis	Wed Jan 30 09:41:15 CET 2019	matK Extraction I	0	true	Bacterial	99.7%
		Fosterella penduliflora isolate 34a tRNA-Lys (trnK) gene, partial sequence; and maturase K (matK) gene, complete cds; chloroplast	EU681919	0	1564	2	99.5%	99.5%	32.7%		1423.04	chloroplast Fosterella penduliflora	Wed Jan 30 09:41:15 CET 2019	matK Extraction I	0	true	Bacterial	99.7%
		MegaBLAST results - only first 10 hits shown	GeneBank_ID	# Nucleotide Sequences With Mates	# Nucleotides	# Sequences	% Identical Sites	% Pairwise Identity	%GC	Accession	Bit-Score	Common Name	Created Date	Database	E Value	Free end gaps	Genetic Code	Grade
	FM956446_Tillandsia filifolia	Tillandsia filifolia isolate B790 trnK-UUU gene, partial sequence; and maturase K (matK) gene, complete cds; plastid	KX754199_Tillandsia filifolia_12_Tillandsia_subg_Tillandsia	0	1564	2	100.0%	100.0%	32.0%		1445.2	plastid Tillandsia filifolia	Wed Jan 30 10:00:45 CET 2019	matK Extraction I	0	true	Bacterial	100.0%
		Tillandsia fuchsii isolate B391 trnK-UUU gene, partial sequence; and maturase K (matK) gene, complete cds; plastid	KX754157	0	1564	2	99.9%	99.9%	32.0%		1439.66	plastid Tillandsia fuchsii	Wed Jan 30 10:00:45 CET 2019	matK Extraction I	0	true	Bacterial	99.9%
		Tillandsia fuchsii isolate JP017 trnK gene, intron; and maturase K (matK) gene, partial cds; chloroplast	KU848366	0	1564	2	99.9%	99.9%	32.0%		1439.66	chloroplast Tillandsia fuchsii	Wed Jan 30 10:00:45 CET 2019	matK Extraction I	0	true	Bacterial	99.9%
		Tillandsia makoyana isolate JP008 trnK gene, intron; and maturase K (matK) gene, partial cds; chloroplast	KU848397	0	1564	2	99.7%	99.7%	31.8%		1434.12	chloroplast Tillandsia makoyana	Wed Jan 30 10:00:45 CET 2019	matK Extraction I	0	true	Bacterial	99.9%
		Tillandsia mirabilis voucher Granados-Mendoza 387 tRNA-Lys (trnK) gene, intron; and maturase K (matK) gene, complete cds; chloroplast	KY114841	0	1564	2	99.6%	99.6%	32.0%		1428.58	chloroplast Tillandsia mirabilis	Wed Jan 30 10:00:45 CET 2019	matK Extraction I	0	true	Bacterial	99.8%
		Tillandsia guatemalensis isolate JP072 trnK gene, intron; and maturase K (matK) gene, partial cds; chloroplast	KU848413_Tillandsia guatemalensis_12_Tillandsia_subg_Tillandsia	0	1564	2	99.6%	99.6%	31.7%		1428.58	chloroplast Tillandsia guatemalensis	Wed Jan 30 10:00:45 CET 2019	matK Extraction I	0	true	Bacterial	99.8%
		Tillandsia makoyana isolate JP051 trnK gene, intron; and maturase K (matK) gene, partial cds; chloroplast	KU848400	0	1564	2	99.6%	99.6%	31.8%		1428.58	chloroplast Tillandsia makoyana	Wed Jan 30 10:00:45 CET 2019	matK Extraction I	0	true	Bacterial	99.8%
		Tillandsia makoyana isolate JP048 trnK gene, intron; and maturase K (matK) gene, partial cds; chloroplast	KU848399	0	1564	2	99.6%	99.6%	31.8%		1428.58	chloroplast Tillandsia makoyana	Wed Jan 30 10:00:45 CET 2019	matK Extraction I	0	true	Bacterial	99.8%
		Tillandsia punctulata isolate B0061 trnK gene, intron; and maturase K (matK) gene, partial cds; chloroplast	KU848362	0	1564	2	99.6%	99.6%	32.0%		1428.58	chloroplast Tillandsia punctulata	Wed Jan 30 10:00:45 CET 2019	matK Extraction I	0	true	Bacterial	99.8%
		Tillandsia bourgaei chloroplast partial tRNA-Lys intron and matK gene for maturase K, specimen voucher MEXU:C. Granados 305	FM956450	0	1564	2	99.6%	99.6%	32.0%		1428.58	chloroplast Tillandsia bourgaei	Wed Jan 30 10:00:45 CET 2019	matK Extraction I	0	true	Bacterial	99.8%
		MegaBLAST results - only first 10 hits shown	GeneBank_ID	# Nucleotide Sequences With Mates	# Nucleotides	# Sequences	% Identical Sites	% Pairwise Identity	%GC	Accession	Bit-Score	Common Name	Created Date	Database	E Value	Free end gaps	Genetic Code	Grade
	HQ167771 - Fosterella albicans	Fosterella albicans isolate B030 tRNA-Lys (trnK) gene, intron; and maturase K (matK) gene, complete cds; chloroplast	HQ167787	0	1564	2	100.0%	100.0%	33.0%		1445.2	chloroplast Fosterella albicans	Wed Jan 30 09:34:03 CET 2019	matK Extraction I	0	true	Bacterial	100.0%
		Fosterella albicans isolate B011 tRNA-Lys (trnK) gene, intron; and maturase K (matK) gene, complete cds; chloroplast	HQ167772	0	1564	2	100.0%	100.0%	33.0%		1445.2	chloroplast Fosterella albicans	Wed Jan 30 09:34:03 CET 2019	matK Extraction I	0	true	Bacterial	100.0%
		Fosterella albicans isolate 64a tRNA-Lys (trnK) gene, partial sequence; and maturase K (matK) gene, complete cds; chloroplast	EU681846	0	1564	2	99.9%	99.9%	33.0%		1441.51	chloroplast Fosterella albicans	Wed Jan 30 09:34:03 CET 2019	matK Extraction I	0	true	Bacterial	100.0%
		Fosterella albicans isolate B032 tRNA-Lys (trnK) gene, intron; and maturase K (matK) gene, complete cds; chloroplast	HQ167789	0	1564	2	99.7%	99.7%	33.0%		1434.12	chloroplast Fosterella albicans	Wed Jan 30 09:34:04 CET 2019	matK Extraction I	0	true	Bacterial	99.9%
		Fosterella albicans isolate B031 tRNA-Lys (trnK) gene, intron; and maturase K (matK) gene, complete cds; chloroplast	HQ167788	0	1564	2	99.7%	99.7%	33.0%		1434.12	chloroplast Fosterella albicans	Wed Jan 30 09:34:04 CET 2019	matK Extraction I	0	true	Bacterial	99.9%
		Fosterella caulescens isolate 80a tRNA-Lys (trnK) gene, partial sequence; and maturase K (matK) gene, partial cds; chloroplast	EU681845	0	1564	2	99.7%	99.7%	33.0%		1434.12	chloroplast Fosterella caulescens	Wed Jan 30 09:34:03 CET 2019	matK Extraction I	0	true	Bacterial	99.9%
		Fosterella albicans isolate 62a tRNA-Lys (trnK) gene, partial sequence; and maturase K (matK) gene, complete cds; chloroplast	EU681843	0	1564	2	99.7%	99.7%	33.0%		1434.12	chloroplast Fosterella albicans	Wed Jan 30 09:34:04 CET 2019	matK Extraction I	0	true	Bacterial	99.9%
		Fosterella caulescens isolate 3a tRNA-Lys (trnK) gene, partial sequence; and maturase K (matK) gene, complete cds; chloroplast	EU681840	0	1564	2	99.7%	99.7%	33.0%		1434.12	chloroplast Fosterella caulescens	Wed Jan 30 09:34:03 CET 2019	matK Extraction I	0	true	Bacterial	99.9%
		Fosterella albicans isolate 94c tRNA-Lys (trnK) gene, partial sequence; and maturase K (matK) gene, complete cds; chloroplast	EU681838	0	1564	2	99.7%	99.7%	33.0%		1434.12	chloroplast Fosterella albicans	Wed Jan 30 09:34:04 CET 2019	matK Extraction I	0	true	Bacterial	99.9%
		Fosterella caulescens isolate H158 tRNA-Lys (trnK) gene, partial sequence; and maturase K (matK) gene, complete cds; chloroplast	AY949995	0	1564	2	99.7%	99.7%	33.0%		1434.12	chloroplast Fosterella caulescens	Wed Jan 30 09:34:03 CET 2019	matK Extraction I	0	true	Bacterial	99.9%
		Fosterella windischii isolate B022 tRNA-Lys (trnK) gene, intron; and maturase K (matK) gene, complete cds; chloroplast	HQ167783	0	1564	2	99.6%	99.7%	32.9%		1432.27	chloroplast Fosterella windischii	Wed Jan 30 09:34:04 CET 2019	matK Extraction I	0	true	Bacterial	99.9%
		MegaBLAST results - only first 10 hits shown	GeneBank_ID	# Nucleotide Sequences With Mates	# Nucleotides	# Sequences	% Identical Sites	% Pairwise Identity	%GC	Accession	Bit-Score	Common Name	Created Date	Database	E Value	Free end gaps	Genetic Code	Grade
	KU197178_Tillandsia capillaris	Tillandsia capillaris isolate B1592 trnK-UUU gene, partial sequence; and maturase K (matK) gene, complete cds; plastid	KX754232_Tillandsia capillaris_1_Tillandsia_subg_Diaphoranthema	0	1564	2	100.0%	100.0%	32.2%		1445.2	plastid Tillandsia capillaris	Wed Jan 30 09:51:58 CET 2019	matK Extraction I	0	true	Bacterial	100.0%
		Tillandsia capillaris isolate B916 trnK-UUU gene, partial sequence; and maturase K (matK) gene, complete cds; plastid	KX754206_Tillandsia capillaris_1_Tillandsia_subg_Diaphoranthema	0	1564	2	100.0%	100.0%	32.2%		1445.2	plastid Tillandsia capillaris	Wed Jan 30 09:51:58 CET 2019	matK Extraction I	0	true	Bacterial	100.0%
		Tillandsia capillaris isolate A47 tRNA-Lys (trnK) gene, intron; and maturase K (matK) gene, complete cds; chloroplast	KU197181_Tillandsia capillaris_1_Tillandsia_subg_Diaphoranthema	0	1564	2	100.0%	100.0%	32.2%		1445.2	chloroplast Tillandsia capillaris	Wed Jan 30 09:51:58 CET 2019	matK Extraction I	0	true	Bacterial	100.0%
		Tillandsia capillaris isolate A46 tRNA-Lys (trnK) gene, intron; and maturase K (matK) gene, complete cds; chloroplast	KU197180_Tillandsia capillaris_1_Tillandsia_subg_Diaphoranthema	0	1564	2	100.0%	100.0%	32.2%		1445.2	chloroplast Tillandsia capillaris	Wed Jan 30 09:51:58 CET 2019	matK Extraction I	0	true	Bacterial	100.0%
		Tillandsia capillaris isolate A45 tRNA-Lys (trnK) gene, intron; and maturase K (matK) gene, complete cds; chloroplast	KU197179_Tillandsia capillaris_1_Tillandsia_subg_Diaphoranthema	0	1564	2	100.0%	100.0%	32.2%		1445.2	chloroplast Tillandsia capillaris	Wed Jan 30 09:51:58 CET 2019	matK Extraction I	0	true	Bacterial	100.0%
		Tillandsia capillaris isolate A32 tRNA-Lys (trnK) gene, intron; and maturase K (matK) gene, complete cds; chloroplast	KU197168_Tillandsia capillaris_1_Tillandsia_subg_Diaphoranthema	0	1564	2	100.0%	100.0%	32.2%		1445.2	chloroplast Tillandsia capillaris	Wed Jan 30 09:51:59 CET 2019	matK Extraction I	0	true	Bacterial	100.0%
		Tillandsia capillaris isolate A29 tRNA-Lys (trnK) gene, intron; and maturase K (matK) gene, complete cds; chloroplast	KU197167_Tillandsia capillaris_1_Tillandsia_subg_Diaphoranthema	0	1564	2	100.0%	100.0%	32.2%		1445.2	chloroplast Tillandsia capillaris	Wed Jan 30 09:51:59 CET 2019	matK Extraction I	0	true	Bacterial	100.0%
		Tillandsia capillaris isolate A26 tRNA-Lys (trnK) gene, intron; and maturase K (matK) gene, complete cds; chloroplast	KU197166_Tillandsia capillaris_1_Tillandsia_subg_Diaphoranthema	0	1564	2	100.0%	100.0%	32.2%		1445.2	chloroplast Tillandsia capillaris	Wed Jan 30 09:51:59 CET 2019	matK Extraction I	0	true	Bacterial	100.0%
		Tillandsia capillaris isolate A25 tRNA-Lys (trnK) gene, intron; and maturase K (matK) gene, complete cds; chloroplast	KU197165_Tillandsia capillaris_1_Tillandsia_subg_Diaphoranthema	0	1564	2	100.0%	100.0%	32.2%		1445.2	chloroplast Tillandsia capillaris	Wed Jan 30 09:51:59 CET 2019	matK Extraction I	0	true	Bacterial	100.0%
		Tillandsia capillaris isolate A24 tRNA-Lys (trnK) gene, intron; and maturase K (matK) gene, complete cds; chloroplast	KU197164_Tillandsia capillaris_1_Tillandsia_subg_Diaphoranthema	0	1564	2	100.0%	100.0%	32.2%		1445.2	chloroplast Tillandsia capillaris	Wed Jan 30 09:51:59 CET 2019	matK Extraction I	0	true	Bacterial	100.0%
		Tillandsia capillaris isolate A23 tRNA-Lys (trnK) gene, intron; and maturase K (matK) gene, complete cds; chloroplast	KU197163_Tillandsia capillaris_1_Tillandsia_subg_Diaphoranthema	0	1564	2	100.0%	100.0%	32.2%		1445.2	chloroplast Tillandsia capillaris	Wed Jan 30 09:51:59 CET 2019	matK Extraction I	0	true	Bacterial	100.0%
		Tillandsia capillaris isolate A22 tRNA-Lys (trnK) gene, intron; and maturase K (matK) gene, complete cds; chloroplast	KU197162_Tillandsia capillaris_1_Tillandsia_subg_Diaphoranthema	0	1564	2	100.0%	100.0%	32.2%		1445.2	chloroplast Tillandsia capillaris	Wed Jan 30 09:51:59 CET 2019	matK Extraction I	0	true	Bacterial	100.0%
		Tillandsia capillaris isolate A21 tRNA-Lys (trnK) gene, intron; and maturase K (matK) gene, complete cds; chloroplast	KU197161_Tillandsia capillaris_1_Tillandsia_subg_Diaphoranthema	0	1564	2	100.0%	100.0%	32.2%		1445.2	chloroplast Tillandsia capillaris	Wed Jan 30 09:51:59 CET 2019	matK Extraction I	0	true	Bacterial	100.0%
		Tillandsia capillaris isolate A17 tRNA-Lys (trnK) gene, intron; and maturase K (matK) gene, complete cds; chloroplast	KU197158_Tillandsia capillaris_1_Tillandsia_subg_Diaphoranthema	0	1564	2	100.0%	100.0%	32.2%		1445.2	chloroplast Tillandsia capillaris	Wed Jan 30 09:51:59 CET 2019	matK Extraction I	0	true	Bacterial	100.0%
		Tillandsia capillaris isolate A15 tRNA-Lys (trnK) gene, intron; and maturase K (matK) gene, complete cds; chloroplast	KU197157_Tillandsia capillaris_1_Tillandsia_subg_Diaphoranthema	0	1564	2	100.0%	100.0%	32.2%		1445.2	chloroplast Tillandsia capillaris	Wed Jan 30 09:51:59 CET 2019	matK Extraction I	0	true	Bacterial	100.0%
		Tillandsia capillaris isolate A14 tRNA-Lys (trnK) gene, intron; and maturase K (matK) gene, complete cds; chloroplast	KU197156_Tillandsia capillaris_1_Tillandsia_subg_Diaphoranthema	0	1564	2	100.0%	100.0%	32.2%		1445.2	chloroplast Tillandsia capillaris	Wed Jan 30 09:51:59 CET 2019	matK Extraction I	0	true	Bacterial	100.0%
		Tillandsia capillaris isolate A13 tRNA-Lys (trnK) gene, intron; and maturase K (matK) gene, complete cds; chloroplast	KU197155_Tillandsia capillaris_1_Tillandsia_subg_Diaphoranthema	0	1564	2	100.0%	100.0%	32.2%		1445.2	chloroplast Tillandsia capillaris	Wed Jan 30 09:51:59 CET 2019	matK Extraction I	0	true	Bacterial	100.0%
		Tillandsia capillaris isolate A12 tRNA-Lys (trnK) gene, intron; and maturase K (matK) gene, complete cds; chloroplast	KU197154_Tillandsia capillaris_1_Tillandsia_subg_Diaphoranthema	0	1564	2	100.0%	100.0%	32.2%		1445.2	chloroplast Tillandsia capillaris	Wed Jan 30 09:51:59 CET 2019	matK Extraction I	0	true	Bacterial	100.0%
		Tillandsia capillaris isolate A4 tRNA-Lys (trnK) gene, intron; and maturase K (matK) gene, complete cds; chloroplast	KU197147_Tillandsia capillaris_1_Tillandsia_subg_Diaphoranthema	0	1564	2	100.0%	100.0%	32.2%		1445.2	chloroplast Tillandsia capillaris	Wed Jan 30 09:51:59 CET 2019	matK Extraction I	0	true	Bacterial	100.0%
		Tillandsia capillaris isolate C3 tRNA-Lys (trnK) gene, intron; and maturase K (matK) gene, complete cds; chloroplast	KU197145_Tillandsia capillaris_1_Tillandsia_subg_Diaphoranthema	0	1564	2	100.0%	100.0%	32.2%		1445.2	chloroplast Tillandsia capillaris	Wed Jan 30 09:51:59 CET 2019	matK Extraction I	0	true	Bacterial	100.0%
		Tillandsia capillaris isolate C2 tRNA-Lys (trnK) gene, intron; and maturase K (matK) gene, complete cds; chloroplast	KU197144_Tillandsia capillaris_1_Tillandsia_subg_Diaphoranthema	0	1564	2	100.0%	100.0%	32.2%		1445.2	chloroplast Tillandsia capillaris	Wed Jan 30 09:51:59 CET 2019	matK Extraction I	0	true	Bacterial	100.0%
		Tillandsia capillaris isolate B48 tRNA-Lys (trnK) gene, intron; and maturase K (matK) gene, complete cds; chloroplast	KU197142_Tillandsia capillaris_1_Tillandsia_subg_Diaphoranthema	0	1564	2	100.0%	100.0%	32.2%		1445.2	chloroplast Tillandsia capillaris	Wed Jan 30 09:51:59 CET 2019	matK Extraction I	0	true	Bacterial	100.0%
		Tillandsia capillaris isolate B47 tRNA-Lys (trnK) gene, intron; and maturase K (matK) gene, complete cds; chloroplast	KU197141_Tillandsia capillaris_1_Tillandsia_subg_Diaphoranthema	0	1564	2	100.0%	100.0%	32.2%		1445.2	chloroplast Tillandsia capillaris	Wed Jan 30 09:51:59 CET 2019	matK Extraction I	0	true	Bacterial	100.0%
		Tillandsia capillaris isolate B35 tRNA-Lys (trnK) gene, intron; and maturase K (matK) gene, complete cds; chloroplast	KU197131_Tillandsia capillaris_1_Tillandsia_subg_Diaphoranthema	0	1564	2	100.0%	100.0%	32.2%		1445.2	chloroplast Tillandsia capillaris	Wed Jan 30 09:51:59 CET 2019	matK Extraction I	0	true	Bacterial	100.0%
		Tillandsia capillaris isolate B31 tRNA-Lys (trnK) gene, intron; and maturase K (matK) gene, complete cds; chloroplast	KU197128_Tillandsia capillaris_1_Tillandsia_subg_Diaphoranthema	0	1564	2	100.0%	100.0%	32.2%		1445.2	chloroplast Tillandsia capillaris	Wed Jan 30 09:51:59 CET 2019	matK Extraction I	0	true	Bacterial	100.0%
		Tillandsia capillaris isolate B29 tRNA-Lys (trnK) gene, intron; and maturase K (matK) gene, complete cds; chloroplast	KU197127_Tillandsia capillaris_1_Tillandsia_subg_Diaphoranthema	0	1564	2	100.0%	100.0%	32.2%		1445.2	chloroplast Tillandsia capillaris	Wed Jan 30 09:51:59 CET 2019	matK Extraction I	0	true	Bacterial	100.0%
		Tillandsia capillaris isolate B17 tRNA-Lys (trnK) gene, intron; and maturase K (matK) gene, complete cds; chloroplast	KU197116_Tillandsia capillaris_1_Tillandsia_subg_Diaphoranthema	0	1564	2	100.0%	100.0%	32.2%		1445.2	chloroplast Tillandsia capillaris	Wed Jan 30 09:51:59 CET 2019	matK Extraction I	0	true	Bacterial	100.0%
		Tillandsia capillaris isolate B15 tRNA-Lys (trnK) gene, intron; and maturase K (matK) gene, complete cds; chloroplast	KU197115_Tillandsia capillaris_1_Tillandsia_subg_Diaphoranthema	0	1564	2	100.0%	100.0%	32.2%		1445.2	chloroplast Tillandsia capillaris	Wed Jan 30 09:51:59 CET 2019	matK Extraction I	0	true	Bacterial	100.0%
		Tillandsia capillaris isolate B12 tRNA-Lys (trnK) gene, intron; and maturase K (matK) gene, complete cds; chloroplast	KU197112_Tillandsia capillaris_1_Tillandsia_subg_Diaphoranthema	0	1564	2	100.0%	100.0%	32.2%		1445.2	chloroplast Tillandsia capillaris	Wed Jan 30 09:51:59 CET 2019	matK Extraction I	0	true	Bacterial	100.0%
		Tillandsia capillaris isolate B11 tRNA-Lys (trnK) gene, intron; and maturase K (matK) gene, complete cds; chloroplast	KU197111_Tillandsia capillaris_1_Tillandsia_subg_Diaphoranthema	0	1564	2	100.0%	100.0%	32.2%		1445.2	chloroplast Tillandsia capillaris	Wed Jan 30 09:51:59 CET 2019	matK Extraction I	0	true	Bacterial	100.0%
		Tillandsia capillaris isolate B9 tRNA-Lys (trnK) gene, intron; and maturase K (matK) gene, complete cds; chloroplast	KU197109_Tillandsia capillaris_1_Tillandsia_subg_Diaphoranthema	0	1564	2	100.0%	100.0%	32.2%		1445.2	chloroplast Tillandsia capillaris	Wed Jan 30 09:51:59 CET 2019	matK Extraction I	0	true	Bacterial	100.0%
		Tillandsia capillaris isolate B6 tRNA-Lys (trnK) gene, intron; and maturase K (matK) gene, complete cds; chloroplast	KU197106_Tillandsia capillaris_1_Tillandsia_subg_Diaphoranthema	0	1564	2	100.0%	100.0%	32.2%		1445.2	chloroplast Tillandsia capillaris	Wed Jan 30 09:51:59 CET 2019	matK Extraction I	0	true	Bacterial	100.0%
		Tillandsia capillaris isolate B4 tRNA-Lys (trnK) gene, intron; and maturase K (matK) gene, complete cds; chloroplast	KU197104_Tillandsia capillaris_1_Tillandsia_subg_Diaphoranthema	0	1564	2	100.0%	100.0%	32.2%		1445.2	chloroplast Tillandsia capillaris	Wed Jan 30 09:51:59 CET 2019	matK Extraction I	0	true	Bacterial	100.0%
		Tillandsia capillaris isolate P13 tRNA-Lys (trnK) gene, intron; and maturase K (matK) gene, complete cds; chloroplast	KU197100_Tillandsia capillaris_1_Tillandsia_subg_Diaphoranthema	0	1564	2	100.0%	100.0%	32.2%		1445.2	chloroplast Tillandsia capillaris	Wed Jan 30 09:51:59 CET 2019	matK Extraction I	0	true	Bacterial	100.0%
		Tillandsia capillaris isolate P9 tRNA-Lys (trnK) gene, intron; and maturase K (matK) gene, complete cds; chloroplast	KU197097_Tillandsia capillaris_1_Tillandsia_subg_Diaphoranthema	0	1564	2	100.0%	100.0%	32.2%		1445.2	chloroplast Tillandsia capillaris	Wed Jan 30 09:51:59 CET 2019	matK Extraction I	0	true	Bacterial	100.0%
		Tillandsia capillaris isolate P8 tRNA-Lys (trnK) gene, intron; and maturase K (matK) gene, complete cds; chloroplast	KU197096_Tillandsia capillaris_1_Tillandsia_subg_Diaphoranthema	0	1564	2	100.0%	100.0%	32.2%		1445.2	chloroplast Tillandsia capillaris	Wed Jan 30 09:51:59 CET 2019	matK Extraction I	0	true	Bacterial	100.0%
		Tillandsia capillaris isolate P7 tRNA-Lys (trnK) gene, intron; and maturase K (matK) gene, complete cds; chloroplast	KU197095_Tillandsia capillaris_1_Tillandsia_subg_Diaphoranthema	0	1564	2	100.0%	100.0%	32.2%		1445.2	chloroplast Tillandsia capillaris	Wed Jan 30 09:51:59 CET 2019	matK Extraction I	0	true	Bacterial	100.0%
		Tillandsia capillaris isolate P6 tRNA-Lys (trnK) gene, intron; and maturase K (matK) gene, complete cds; chloroplast	KU197094_Tillandsia capillaris_1_Tillandsia_subg_Diaphoranthema	0	1564	2	100.0%	100.0%	32.2%		1445.2	chloroplast Tillandsia capillaris	Wed Jan 30 09:51:59 CET 2019	matK Extraction I	0	true	Bacterial	100.0%
		Tillandsia capillaris isolate P5 tRNA-Lys (trnK) gene, intron; and maturase K (matK) gene, complete cds; chloroplast	KU197093_Tillandsia capillaris_1_Tillandsia_subg_Diaphoranthema	0	1564	2	100.0%	100.0%	32.2%		1445.2	chloroplast Tillandsia capillaris	Wed Jan 30 09:51:59 CET 2019	matK Extraction I	0	true	Bacterial	100.0%
		Tillandsia capillaris isolate P4 tRNA-Lys (trnK) gene, intron; and maturase K (matK) gene, complete cds; chloroplast	KU197092_Tillandsia capillaris_1_Tillandsia_subg_Diaphoranthema	0	1564	2	100.0%	100.0%	32.2%		1445.2	chloroplast Tillandsia capillaris	Wed Jan 30 09:51:59 CET 2019	matK Extraction I	0	true	Bacterial	100.0%
		Tillandsia capillaris isolate P2 tRNA-Lys (trnK) gene, intron; and maturase K (matK) gene, complete cds; chloroplast	KU197090_Tillandsia capillaris_1_Tillandsia_subg_Diaphoranthema	0	1564	2	100.0%	100.0%	32.2%		1445.2	chloroplast Tillandsia capillaris	Wed Jan 30 09:51:59 CET 2019	matK Extraction I	0	true	Bacterial	100.0%
		Tillandsia capillaris isolate P1 tRNA-Lys (trnK) gene, intron; and maturase K (matK) gene, complete cds; chloroplast	KU197089_Tillandsia capillaris_1_Tillandsia_subg_Diaphoranthema	0	1564	2	100.0%	100.0%	32.2%		1445.2	chloroplast Tillandsia capillaris	Wed Jan 30 09:51:59 CET 2019	matK Extraction I	0	true	Bacterial	100.0%
		Tillandsia albertiana isolate B212 trnK-UUU gene, partial sequence; and maturase K (matK) gene, complete cds; plastid	KX754127_Tillandsia albertiana	0	1564	2	99.9%	99.9%	32.4%		1439.66	plastid Tillandsia albertiana	Wed Jan 30 09:51:59 CET 2019	matK Extraction I	0	true	Bacterial	99.9%
		Tillandsia esseriana MB-69 tRNA-Lys (trnK) gene, partial sequence; and maturase K (matK) gene, complete cds; chloroplast	AY614120_Tillandsia esseriana	0	1564	2	99.9%	99.9%	32.4%		1439.66	chloroplast Tillandsia esseriana	Wed Jan 30 09:51:59 CET 2019	matK Extraction I	0	true	Bacterial	99.9%
		Tillandsia albertiana MB-33 tRNA-Lys (trnK) gene, partial sequence; and maturase K (matK) gene, complete cds; chloroplast	AY614117_Tillandsia albertiana	0	1564	2	99.9%	99.9%	32.4%		1439.66	chloroplast Tillandsia albertiana	Wed Jan 30 09:51:59 CET 2019	matK Extraction I	0	true	Bacterial	99.9%
		Tillandsia recurvata isolate B529 trnK-UUU gene, partial sequence; and maturase K (matK) gene, complete cds; plastid	KX754174_Tillandsia recurvata_1_Tillandsia_subg_Diaphoranthema	0	1564	2	99.7%	99.7%	32.5%		1434.12	Renealmia recurvata L.	Wed Jan 30 09:51:59 CET 2019	matK Extraction I	0	true	Bacterial	99.9%
		MegaBLAST results - only first 10 hits shown	GeneBank_ID	# Nucleotide Sequences With Mates	# Nucleotides	# Sequences	% Identical Sites	% Pairwise Identity	%GC	Accession	Bit-Score	Common Name	Created Date	Database	E Value	Free end gaps	Genetic Code	Grade
	KU762834 - Aechmea tonduzii	Aechmea tonduzii voucher MSBG 1987-0115A (Living specimen) trnK gene, partial sequence; and maturase K (matK) gene, complete cds; chloroplast	KU762836	0	1564	2	100.0%	100.0%	32.9%		1445.2	chloroplast Aechmea tonduzii	Wed Jan 30 09:13:54 CET 2019	matK Extraction I	0	true	Bacterial	100.0%
		Aechmea tonduzii voucher MSBG 2003-0378A (Living specimen) trnK gene, partial sequence; and maturase K (matK) gene, complete cds; chloroplast	KU762835	0	1564	2	100.0%	100.0%	32.9%		1445.2	chloroplast Aechmea tonduzii	Wed Jan 30 09:13:54 CET 2019	matK Extraction I	0	true	Bacterial	100.0%
		Aechmea tonduzii voucher Aguirre-Santoro 725 (SEL) trnK gene, partial sequence; and maturase K (matK) gene, complete cds; chloroplast	KU762744	0	1564	2	100.0%	100.0%	32.9%		1445.2	chloroplast Aechmea tonduzii	Wed Jan 30 09:13:54 CET 2019	matK Extraction I	0	true	Bacterial	100.0%
		Aechmea lueddemanniana voucher MSBG 1997-0147A (Living specimen) trnK gene, partial sequence; and maturase K (matK) gene, complete cds; chloroplast	KU762879_Aechmea lueddemanniana _24_Central_American_group	0	1564	2	99.6%	99.6%	33.1%		1428.58	chloroplast Aechmea lueddemanniana	Wed Jan 30 09:13:55 CET 2019	matK Extraction I	0	true	Bacterial	99.8%
		Aechmea fraseri voucher Aguirre-Santoro 724 (SEL) trnK gene, partial sequence; and maturase K (matK) gene, complete cds; chloroplast	KU762823	0	1564	2	99.6%	99.6%	32.7%		1428.58	chloroplast Aechmea fraseri	Wed Jan 30 09:13:56 CET 2019	matK Extraction I	0	true	Bacterial	99.8%
		Ananas nanus voucher MSBG 1197-1 foster (Living specimen) trnK gene, partial sequence; and maturase K (matK) gene, complete cds; chloroplast	KU762815	0	1564	2	99.6%	99.6%	33.1%		1428.58	chloroplast Ananas comosus var. microstachys	Wed Jan 30 09:13:55 CET 2019	matK Extraction I	0	true	Bacterial	99.8%
		Ananas comosus voucher Holst 6244 (SEL) trnK gene, partial sequence; and maturase K (matK) gene, complete cds; chloroplast	KU762814	0	1564	2	99.6%	99.6%	33.1%		1428.58	pineapple	Wed Jan 30 09:13:55 CET 2019	matK Extraction I	0	true	Bacterial	99.8%
		Lymania corallina voucher MSBG 1996-0662A (Living specimen) trnK gene, partial sequence; and maturase K (matK) gene, complete cds; chloroplast	KU762801	0	1564	2	99.6%	99.6%	33.1%		1428.58	chloroplast Lymania corallina	Wed Jan 30 09:13:54 CET 2019	matK Extraction I	0	true	Bacterial	99.8%
		Aechmea allenii voucher Aguirre-Santoro 702 (SEL) trnK gene, partial sequence; and maturase K (matK) gene, complete cds; chloroplast	KU762745	0	1564	2	99.6%	99.6%	32.7%		1428.58	chloroplast Aechmea allenii	Wed Jan 30 09:13:56 CET 2019	matK Extraction I	0	true	Bacterial	99.8%
		Ananas ananassoides maturase K (matK) gene, complete cds; chloroplast	KU659085	0	1564	2	99.6%	99.6%	33.1%		1428.58	chloroplast Ananas comosus var. microstachys	Wed Jan 30 09:13:55 CET 2019	matK Extraction I	0	true	Bacterial	99.8%
		MegaBLAST results - only first 10 hits shown	GeneBank_ID	# Nucleotide Sequences With Mates	# Nucleotides	# Sequences	% Identical Sites	% Pairwise Identity	%GC	Accession	Bit-Score	Common Name	Created Date	Database	E Value	Free end gaps	Genetic Code	Grade
	KU848348 - Tillandsia secunda	Tillandsia secunda isolate B528 trnK-UUU gene, partial sequence; and maturase K (matK) gene, complete cds; plastid	KX754173	0	1564	2	100.0%	100.0%	32.0%		1445.2	plastid Tillandsia secunda	Wed Jan 30 10:42:53 CET 2019	matK Extraction I	0	true	Bacterial	100.0%
		Tillandsia secunda isolate B527 trnK-UUU gene, partial sequence; and maturase K (matK) gene, complete cds; plastid	KX754172	0	1564	2	99.9%	99.9%	31.8%		1439.66	plastid Tillandsia secunda	Wed Jan 30 10:42:53 CET 2019	matK Extraction I	0	true	Bacterial	99.9%
		Tillandsia spiraliflora isolate B762 trnK-UUU gene, partial sequence; and maturase K (matK) gene, complete cds; plastid	KX754197_Tillandsia spiraliflora_12_Tillandsia_subg_Tillandsia	0	1564	2	99.5%	99.5%	32.0%		1423.04	plastid Tillandsia spiraliflora	Wed Jan 30 10:42:53 CET 2019	matK Extraction I	0	true	Bacterial	99.7%
		Tillandsia spiraliflora isolate JP104 trnK gene, intron; and maturase K (matK) gene, partial cds; chloroplast	KU848349	0	1564	2	99.5%	99.5%	32.0%		1423.04	chloroplast Tillandsia spiraliflora	Wed Jan 30 10:42:53 CET 2019	matK Extraction I	0	true	Bacterial	99.7%
		Tillandsia hildae isolate B763 trnK-UUU gene, partial sequence; and maturase K (matK) gene, complete cds; plastid	KX754198	0	1564	2	99.4%	99.4%	32.4%		1417.5	plastid Tillandsia hildae	Wed Jan 30 10:42:54 CET 2019	matK Extraction I	0	true	Bacterial	99.7%
		Tillandsia malzinei isolate B492 trnK-UUU gene, partial sequence; and maturase K (matK) gene, complete cds; plastid	KX754170	0	1564	2	99.4%	99.4%	32.4%		1417.5	Vriesea malzinei E. Morren	Wed Jan 30 10:42:54 CET 2019	matK Extraction I	0	true	Bacterial	99.7%
		Tillandsia propagulifera isolate B310 trnK-UUU gene, partial sequence; and maturase K (matK) gene, complete cds; plastid	KX754143_Tillandsia propagulifera_12_Tillandsia_subg_Tillandsia	0	1564	2	99.4%	99.4%	32.0%		1417.5	plastid Tillandsia propagulifera	Wed Jan 30 10:42:54 CET 2019	matK Extraction I	0	true	Bacterial	99.7%
		Tillandsia malzinei isolate B145 trnK-UUU gene, partial sequence; and maturase K (matK) gene, complete cds; plastid	KX754112	0	1564	2	99.4%	99.4%	32.4%		1417.5	Vriesea malzinei E. Morren	Wed Jan 30 10:42:54 CET 2019	matK Extraction I	0	true	Bacterial	99.7%
		Tillandsia hildae isolate JP040 trnK gene, intron; and maturase K (matK) gene, partial cds; chloroplast	KU848355	0	1564	2	99.4%	99.4%	32.4%		1417.5	chloroplast Tillandsia hildae	Wed Jan 30 10:42:54 CET 2019	matK Extraction I	0	true	Bacterial	99.7%
		Tillandsia mima isolate JP091 trnK gene, intron; and maturase K (matK) gene, partial cds; chloroplast	KU848351	0	1564	2	99.4%	99.4%	32.2%		1417.5	chloroplast Tillandsia mima	Wed Jan 30 10:42:54 CET 2019	matK Extraction I	0	true	Bacterial	99.7%
		MegaBLAST results - only first 10 hits shown	GeneBank_ID	# Nucleotide Sequences With Mates	# Nucleotides	# Sequences	% Identical Sites	% Pairwise Identity	%GC	Accession	Bit-Score	Common Name	Created Date	Database	E Value	Free end gaps	Genetic Code	Grade
	KU848398 - Tillandsia makoyana	Tillandsia makoyana isolate JP051 trnK gene, intron; and maturase K (matK) gene, partial cds; chloroplast	KU848400	0	1564	2	100.0%	100.0%	31.8%		1445.2	chloroplast Tillandsia makoyana	Wed Jan 30 10:41:59 CET 2019	matK Extraction I	0	true	Bacterial	100.0%
		Tillandsia makoyana isolate JP048 trnK gene, intron; and maturase K (matK) gene, partial cds; chloroplast	KU848399	0	1564	2	100.0%	100.0%	31.8%		1445.2	chloroplast Tillandsia makoyana	Wed Jan 30 10:41:59 CET 2019	matK Extraction I	0	true	Bacterial	100.0%
		Tillandsia makoyana isolate JP008 trnK gene, intron; and maturase K (matK) gene, partial cds; chloroplast	KU848397	0	1564	2	99.9%	99.9%	31.8%		1439.66	chloroplast Tillandsia makoyana	Wed Jan 30 10:41:59 CET 2019	matK Extraction I	0	true	Bacterial	99.9%
		Tillandsia mirabilis voucher Granados-Mendoza 387 tRNA-Lys (trnK) gene, intron; and maturase K (matK) gene, complete cds; chloroplast	KY114841	0	1564	2	99.7%	99.7%	32.0%		1434.12	chloroplast Tillandsia mirabilis	Wed Jan 30 10:42:00 CET 2019	matK Extraction I	0	true	Bacterial	99.9%
		Tillandsia fuchsii isolate B391 trnK-UUU gene, partial sequence; and maturase K (matK) gene, complete cds; plastid	KX754157	0	1564	2	99.7%	99.7%	32.0%		1434.12	plastid Tillandsia fuchsii	Wed Jan 30 10:42:00 CET 2019	matK Extraction I	0	true	Bacterial	99.9%
		Tillandsia guatemalensis isolate JP072 trnK gene, intron; and maturase K (matK) gene, partial cds; chloroplast	KU848413_Tillandsia guatemalensis_12_Tillandsia_subg_Tillandsia	0	1564	2	99.7%	99.7%	31.7%		1434.12	chloroplast Tillandsia guatemalensis	Wed Jan 30 10:42:00 CET 2019	matK Extraction I	0	true	Bacterial	99.9%
		Tillandsia fuchsii isolate JP017 trnK gene, intron; and maturase K (matK) gene, partial cds; chloroplast	KU848366	0	1564	2	99.7%	99.7%	32.0%		1434.12	chloroplast Tillandsia fuchsii	Wed Jan 30 10:42:00 CET 2019	matK Extraction I	0	true	Bacterial	99.9%
		Tillandsia punctulata isolate B0061 trnK gene, intron; and maturase K (matK) gene, partial cds; chloroplast	KU848362	0	1564	2	99.7%	99.7%	32.0%		1434.12	chloroplast Tillandsia punctulata	Wed Jan 30 10:41:59 CET 2019	matK Extraction I	0	true	Bacterial	99.9%
		Tillandsia bourgaei chloroplast partial tRNA-Lys intron and matK gene for maturase K, specimen voucher MEXU:C. Granados 305	FM956450	0	1564	2	99.7%	99.7%	32.0%		1434.12	chloroplast Tillandsia bourgaei	Wed Jan 30 10:42:00 CET 2019	matK Extraction I	0	true	Bacterial	99.9%
		Tillandsia erubescens chloroplast partial tRNA-Lys intron and matK gene for maturase K, specimen voucher MEXU:C. Granados 360	FM956447	0	1564	2	99.7%	99.7%	32.0%		1434.12	chloroplast Tillandsia erubescens	Wed Jan 30 10:42:00 CET 2019	matK Extraction I	0	true	Bacterial	99.9%
		MegaBLAST results - only first 10 hits shown	GeneBank_ID	# Nucleotide Sequences With Mates	# Nucleotides	# Sequences	% Identical Sites	% Pairwise Identity	%GC	Accession	Bit-Score	Common Name	Created Date	Database	E Value	Free end gaps	Genetic Code	Grade
	AF162232 - Deuterocohnia lotteae	Deuterocohnia lotteae isolate F44a tRNA-Lys (trnK) gene, partial sequence; and maturase K (matK) gene, complete cds; chloroplast	EU681894	0	1564	2	100.0%	100.0%	33.2%		1445.2	chloroplast Deuterocohnia lotteae	Wed Jan 30 09:33:31 CET 2019	matK Extraction I	0	true	Bacterial	100.0%
		Deuterocohnia glandulosa isolate F43a tRNA-Lys (trnK) gene, partial sequence; and maturase K (matK) gene, complete cds; chloroplast	EU681893	0	1564	2	100.0%	100.0%	33.2%		1445.2	chloroplast Deuterocohnia glandulosa	Wed Jan 30 09:33:31 CET 2019	matK Extraction I	0	true	Bacterial	100.0%
		Deuterocohnia longipetala maturase K (matK) gene, complete cds; chloroplast	AF162231	0	1564	2	100.0%	100.0%	33.2%		1445.2	chloroplast Deuterocohnia longipetala	Wed Jan 30 09:33:31 CET 2019	matK Extraction I	0	true	Bacterial	100.0%
		Deuterocohnia brevifolia isolate F42a tRNA-Lys (trnK) gene, partial sequence; and maturase K (matK) gene, complete cds; chloroplast	EU681895	0	1564	2	99.6%	99.6%	32.9%		1428.58	chloroplast Deuterocohnia brevifolia	Wed Jan 30 09:33:31 CET 2019	matK Extraction I	0	true	Bacterial	99.8%
NEGATIVE		Aechmea lueddemanniana voucher MSBG 1997-0147A (Living specimen) trnK gene, partial sequence; and maturase K (matK) gene, complete cds; chloroplast	KU762879_Aechmea lueddemanniana _24_Central_American_group	0	1564	2	99.4%	99.4%	33.1%		1417.5	chloroplast Aechmea lueddemanniana	Wed Jan 30 09:33:32 CET 2019	matK Extraction I	0	true	Bacterial	99.7%
		Ananas nanus voucher MSBG 1197-1 foster (Living specimen) trnK gene, partial sequence; and maturase K (matK) gene, complete cds; chloroplast	KU762815	0	1564	2	99.4%	99.4%	33.1%		1417.5	chloroplast Ananas comosus var. microstachys	Wed Jan 30 09:33:31 CET 2019	matK Extraction I	0	true	Bacterial	99.7%
		Ananas comosus voucher Holst 6244 (SEL) trnK gene, partial sequence; and maturase K (matK) gene, complete cds; chloroplast	KU762814	0	1564	2	99.4%	99.4%	33.1%		1417.5	pineapple	Wed Jan 30 09:33:31 CET 2019	matK Extraction I	0	true	Bacterial	99.7%
		Lymania corallina voucher MSBG 1996-0662A (Living specimen) trnK gene, partial sequence; and maturase K (matK) gene, complete cds; chloroplast	KU762801	0	1564	2	99.4%	99.4%	33.1%		1417.5	chloroplast Lymania corallina	Wed Jan 30 09:33:31 CET 2019	matK Extraction I	0	true	Bacterial	99.7%
		Ananas ananassoides maturase K (matK) gene, complete cds; chloroplast	KU659085	0	1564	2	99.4%	99.4%	33.1%		1417.5	chloroplast Ananas comosus var. microstachys	Wed Jan 30 09:33:31 CET 2019	matK Extraction I	0	true	Bacterial	99.7%
		Ananas ananassoides maturase K (matK) gene, complete cds; chloroplast	KU659084	0	1564	2	99.4%	99.4%	33.1%		1417.5	chloroplast Ananas comosus var. microstachys	Wed Jan 30 09:33:31 CET 2019	matK Extraction I	0	true	Bacterial	99.7%
		MegaBLAST results - only first 10 hits shown	GeneBank_ID	# Nucleotide Sequences With Mates	# Nucleotides	# Sequences	% Identical Sites	% Pairwise Identity	%GC	Accession	Bit-Score	Common Name	Created Date	Database	E Value	Free end gaps	Genetic Code	Grade
	AF539978 - Tillandsia espinosae	Tillandsia tricolor voucher Granados-Mendoza 418 tRNA-Lys (trnK) gene, intron; and maturase K (matK) gene, complete cds; chloroplast	KY114858	0	1564	2	100.0%	100.0%	31.8%		1445.2	chloroplast Tillandsia tricolor	Wed Jan 30 09:52:53 CET 2019	matK Extraction I	0	true	Bacterial	100.0%
		Tillandsia streptophylla voucher Salazar-Chavez 8696 tRNA-Lys (trnK) gene, intron; and maturase K (matK) gene, complete cds; chloroplast	KY114852	0	1564	2	100.0%	100.0%	31.8%		1445.2	chloroplast Tillandsia streptophylla	Wed Jan 30 09:52:53 CET 2019	matK Extraction I	0	true	Bacterial	100.0%
		Tillandsia polystachia voucher Granados-Mendoza 357 tRNA-Lys (trnK) gene, intron; and maturase K (matK) gene, complete cds; chloroplast	KY114846	0	1564	2	100.0%	100.0%	31.8%		1445.2	chloroplast Tillandsia polystachia	Wed Jan 30 09:52:53 CET 2019	matK Extraction I	0	true	Bacterial	100.0%
		Tillandsia concolor voucher Flores Maria 1808 tRNA-Lys (trnK) gene, intron; and maturase K (matK) gene, complete cds; chloroplast	KY114820	0	1564	2	100.0%	100.0%	31.8%		1445.2	chloroplast Tillandsia concolor	Wed Jan 30 09:52:53 CET 2019	matK Extraction I	0	true	Bacterial	100.0%
		Tillandsia capitata voucher Granados-Mendoza 309 tRNA-Lys (trnK) gene, intron; and maturase K (matK) gene, complete cds; chloroplast	KY114819	0	1564	2	100.0%	100.0%	31.8%		1445.2	chloroplast Tillandsia capitata	Wed Jan 30 09:52:53 CET 2019	matK Extraction I	0	true	Bacterial	100.0%
		Tillandsia butzii voucher Granados-Mendoza 405 tRNA-Lys (trnK) gene, intron; and maturase K (matK) gene, complete cds; chloroplast	KY114816	0	1564	2	100.0%	100.0%	31.8%		1445.2	chloroplast Tillandsia butzii	Wed Jan 30 09:52:53 CET 2019	matK Extraction I	0	true	Bacterial	100.0%
		Tillandsia balbisiana voucher Torres 1390 tRNA-Lys (trnK) gene, intron; and maturase K (matK) gene, complete cds; chloroplast	KY114810	0	1564	2	100.0%	100.0%	31.8%		1445.2	chloroplast Tillandsia balbisiana	Wed Jan 30 09:52:53 CET 2019	matK Extraction I	0	true	Bacterial	100.0%
		Tillandsia setacea isolate B1246 trnK-UUU gene, partial sequence; and maturase K (matK) gene, complete cds; plastid	KX754214	0	1564	2	100.0%	100.0%	31.8%		1445.2	plastid Tillandsia setacea	Wed Jan 30 09:52:53 CET 2019	matK Extraction I	0	true	Bacterial	100.0%
		Tillandsia fasciculata isolate B717 trnK-UUU gene, partial sequence; and maturase K (matK) gene, complete cds; plastid	KX754189	0	1564	2	100.0%	100.0%	31.8%		1445.2	plastid Tillandsia fasciculata	Wed Jan 30 09:52:53 CET 2019	matK Extraction I	0	true	Bacterial	100.0%
		Tillandsia flabellata isolate JP069N maturase K (matK) gene, intron and partial cds; chloroplast	KU848416	0	1564	2	100.0%	100.0%	31.8%		1445.2	chloroplast Tillandsia flabellata	Wed Jan 30 09:52:53 CET 2019	matK Extraction I	0	true	Bacterial	100.0%
		MegaBLAST results - only first 10 hits shown	GeneBank_ID	# Nucleotide Sequences With Mates	# Nucleotides	# Sequences	% Identical Sites	% Pairwise Identity	%GC	Accession	Bit-Score	Common Name	Created Date	Database	E Value	Free end gaps	Genetic Code	Grade
	AY614094_Tillandsia guatemalensis	Tillandsia guatemalensis isolate JP072 trnK gene, intron; and maturase K (matK) gene, partial cds; chloroplast	KU848413_Tillandsia guatemalensis_12_Tillandsia_subg_Tillandsia	0	1564	2	100.0%	100.0%	31.7%		1445.2	chloroplast Tillandsia guatemalensis	Wed Jan 30 10:01:11 CET 2019	matK Extraction I	0	true	Bacterial	100.0%
		Tillandsia guatemalensis MB-104 tRNA-Lys (trnK) gene, partial sequence; and maturase K (matK) gene, complete cds; chloroplast	AY614093_Tillandsia guatemalensis_12_Tillandsia_subg_Tillandsia	0	1564	2	100.0%	100.0%	31.7%		1445.2	chloroplast Tillandsia guatemalensis	Wed Jan 30 10:01:11 CET 2019	matK Extraction I	0	true	Bacterial	100.0%
		Tillandsia makoyana isolate JP008 trnK gene, intron; and maturase K (matK) gene, partial cds; chloroplast	KU848397	0	1564	2	99.9%	99.9%	31.8%		1439.66	chloroplast Tillandsia makoyana	Wed Jan 30 10:01:12 CET 2019	matK Extraction I	0	true	Bacterial	99.9%
		Tillandsia mirabilis voucher Granados-Mendoza 387 tRNA-Lys (trnK) gene, intron; and maturase K (matK) gene, complete cds; chloroplast	KY114841	0	1564	2	99.7%	99.7%	32.0%		1434.12	chloroplast Tillandsia mirabilis	Wed Jan 30 10:01:12 CET 2019	matK Extraction I	0	true	Bacterial	99.9%
		Tillandsia fuchsii isolate B391 trnK-UUU gene, partial sequence; and maturase K (matK) gene, complete cds; plastid	KX754157	0	1564	2	99.7%	99.7%	32.0%		1434.12	plastid Tillandsia fuchsii	Wed Jan 30 10:01:12 CET 2019	matK Extraction I	0	true	Bacterial	99.9%
		Tillandsia makoyana isolate JP051 trnK gene, intron; and maturase K (matK) gene, partial cds; chloroplast	KU848400	0	1564	2	99.7%	99.7%	31.8%		1434.12	chloroplast Tillandsia makoyana	Wed Jan 30 10:01:12 CET 2019	matK Extraction I	0	true	Bacterial	99.9%
		Tillandsia makoyana isolate JP048 trnK gene, intron; and maturase K (matK) gene, partial cds; chloroplast	KU848399	0	1564	2	99.7%	99.7%	31.8%		1434.12	chloroplast Tillandsia makoyana	Wed Jan 30 10:01:12 CET 2019	matK Extraction I	0	true	Bacterial	99.9%
		Tillandsia fuchsii isolate JP017 trnK gene, intron; and maturase K (matK) gene, partial cds; chloroplast	KU848366	0	1564	2	99.7%	99.7%	32.0%		1434.12	chloroplast Tillandsia fuchsii	Wed Jan 30 10:01:12 CET 2019	matK Extraction I	0	true	Bacterial	99.9%
		Tillandsia punctulata isolate B0061 trnK gene, intron; and maturase K (matK) gene, partial cds; chloroplast	KU848362	0	1564	2	99.7%	99.7%	32.0%		1434.12	chloroplast Tillandsia punctulata	Wed Jan 30 10:01:12 CET 2019	matK Extraction I	0	true	Bacterial	99.9%
		Tillandsia bourgaei chloroplast partial tRNA-Lys intron and matK gene for maturase K, specimen voucher MEXU:C. Granados 305	FM956450	0	1564	2	99.7%	99.7%	32.0%		1434.12	chloroplast Tillandsia bourgaei	Wed Jan 30 10:01:12 CET 2019	matK Extraction I	0	true	Bacterial	99.9%
		Tillandsia erubescens chloroplast partial tRNA-Lys intron and matK gene for maturase K, specimen voucher MEXU:C. Granados 360	FM956447	0	1564	2	99.7%	99.7%	32.0%		1434.12	chloroplast Tillandsia erubescens	Wed Jan 30 10:01:12 CET 2019	matK Extraction I	0	true	Bacterial	99.9%
		Tillandsia makoyana chloroplast partial tRNA-Lys intron and matK gene for maturase K, specimen voucher MEXU:C. Granados 278	FM956439	0	1564	2	99.7%	99.7%	32.0%		1434.12	chloroplast Tillandsia makoyana	Wed Jan 30 10:01:12 CET 2019	matK Extraction I	0	true	Bacterial	99.9%
		Tillandsia punctulata MB-61 tRNA-Lys (trnK) gene, partial sequence; and maturase K (matK) gene, complete cds; chloroplast	AY614087	0	1564	2	99.7%	99.7%	32.0%		1434.12	chloroplast Tillandsia punctulata	Wed Jan 30 10:01:12 CET 2019	matK Extraction I	0	true	Bacterial	99.9%
		Tillandsia magnusiana voucher Granados-Mendoza 332 tRNA-Lys (trnK) gene, intron; and maturase K (matK) gene, complete cds; chloroplast	KY114840	0	1564	2	99.6%	99.6%	31.8%		1428.58	chloroplast Tillandsia magnusiana	Wed Jan 30 10:01:12 CET 2019	matK Extraction I	0	true	Bacterial	99.8%
		Tillandsia albida voucher Flores s.n. tRNA-Lys (trnK) gene, intron; and maturase K (matK) gene, complete cds; chloroplast	KY114807	0	1564	2	99.6%	99.6%	31.6%		1428.58	chloroplast Tillandsia albida	Wed Jan 30 10:01:12 CET 2019	matK Extraction I	0	true	Bacterial	99.8%
		Tillandsia filifolia isolate B790 trnK-UUU gene, partial sequence; and maturase K (matK) gene, complete cds; plastid	KX754199_Tillandsia filifolia_12_Tillandsia_subg_Tillandsia	0	1564	2	99.6%	99.6%	32.0%		1428.58	plastid Tillandsia filifolia	Wed Jan 30 10:01:12 CET 2019	matK Extraction I	0	true	Bacterial	99.8%
		Tillandsia juerg-rutschmannii isolate B715 trnK-UUU gene, partial sequence; and maturase K (matK) gene, complete cds; plastid	KX754188_Tillandsia juerg-rutschmannii_12_Tillandsia_subg_Tillandsia	0	1564	2	99.6%	99.6%	31.8%		1428.58	plastid Tillandsia juerg-rutschmannii	Wed Jan 30 10:01:12 CET 2019	matK Extraction I	0	true	Bacterial	99.8%
		Tillandsia guatemalensis isolate B0008 trnK gene, intron; and maturase K (matK) gene, partial cds; chloroplast	KU848412_Tillandsia guatemalensis_12_Tillandsia_subg_Tillandsia	0	1564	2	99.6%	99.6%	31.6%		1428.58	chloroplast Tillandsia guatemalensis	Wed Jan 30 10:01:12 CET 2019	matK Extraction I	0	true	Bacterial	99.8%
		Tillandsia fresnilloensis isolate JP018 trnK gene, intron; and maturase K (matK) gene, partial cds; chloroplast	KU848381	0	1564	2	99.6%	99.6%	31.6%		1428.58	chloroplast Tillandsia fresnilloensis	Wed Jan 30 10:01:12 CET 2019	matK Extraction I	0	true	Bacterial	99.8%
		Tillandsia utriculata subsp. pringlei isolate B0734 trnK gene, intron; and maturase K (matK) gene, partial cds; chloroplast	KU848379_Tillandsia utriculata_12_Tillandsia_subg_Tillandsia	0	1564	2	99.6%	99.6%	31.6%		1428.58	chloroplast Tillandsia utriculata subsp. pringlei	Wed Jan 30 10:01:12 CET 2019	matK Extraction I	0	true	Bacterial	99.8%
		Tillandsia utriculata subsp. pringlei isolate B0736 trnK gene, intron; and maturase K (matK) gene, partial cds; chloroplast	KU848378_Tillandsia utriculata_12_Tillandsia_subg_Tillandsia	0	1564	2	99.6%	99.6%	31.6%		1428.58	chloroplast Tillandsia utriculata subsp. pringlei	Wed Jan 30 10:01:12 CET 2019	matK Extraction I	0	true	Bacterial	99.8%
		Tillandsia utriculata subsp. pringlei isolate B0735 trnK gene, intron; and maturase K (matK) gene, partial cds; chloroplast	KU848377_Tillandsia utriculata_12_Tillandsia_subg_Tillandsia	0	1564	2	99.6%	99.6%	31.6%		1428.58	chloroplast Tillandsia utriculata subsp. pringlei	Wed Jan 30 10:01:12 CET 2019	matK Extraction I	0	true	Bacterial	99.8%
		Tillandsia utriculata subsp. pringlei isolate JP0733 trnK gene, intron; and maturase K (matK) gene, partial cds; chloroplast	KU848376_Tillandsia utriculata_12_Tillandsia_subg_Tillandsia	0	1564	2	99.6%	99.6%	31.6%		1428.58	chloroplast Tillandsia utriculata subsp. pringlei	Wed Jan 30 10:01:12 CET 2019	matK Extraction I	0	true	Bacterial	99.8%
		Tillandsia utriculata isolate JP006 trnK gene, intron; and maturase K (matK) gene, partial cds; chloroplast	KU848370_Tillandsia utriculata_12_Tillandsia_subg_Tillandsia	0	1564	2	99.6%	99.6%	31.6%		1428.58	chloroplast Tillandsia utriculata	Wed Jan 30 10:01:12 CET 2019	matK Extraction I	0	true	Bacterial	99.8%
		Tillandsia calcicola isolate JP105 trnK gene, intron; and maturase K (matK) gene, partial cds; chloroplast	KU848367	0	1564	2	99.6%	99.6%	31.6%		1428.58	chloroplast Tillandsia calcicola	Wed Jan 30 10:01:12 CET 2019	matK Extraction I	0	true	Bacterial	99.8%
		Tillandsia remota MB-72 tRNA-Lys (trnK) gene, partial sequence; and maturase K (matK) gene, complete cds; chloroplast	AY614095_Tillandsia remota_12_Tillandsia_subg_Tillandsia	0	1564	2	99.6%	99.6%	31.8%		1428.58	chloroplast Tillandsia remota	Wed Jan 30 10:01:12 CET 2019	matK Extraction I	0	true	Bacterial	99.8%
		Tillandsia guatemalensis MB-8 tRNA-Lys (trnK) gene, partial sequence; and maturase K (matK) gene, complete cds; chloroplast	AY614092_Tillandsia guatemalensis_12_Tillandsia_subg_Tillandsia	0	1564	2	99.6%	99.6%	31.6%		1428.58	chloroplast Tillandsia guatemalensis	Wed Jan 30 10:01:12 CET 2019	matK Extraction I	0	true	Bacterial	99.8%
		MegaBLAST results - only first 10 hits shown	GeneBank_ID	# Nucleotide Sequences With Mates	# Nucleotides	# Sequences	% Identical Sites	% Pairwise Identity	%GC	Accession	Bit-Score	Common Name	Created Date	Database	E Value	Free end gaps	Genetic Code	Grade
	AY614121_Tillandsia usneoides	Tillandsia landbeckii subsp. andina isolate B423 trnK-UUU gene, partial sequence; and maturase K (matK) gene, complete cds; plastid	KX754162_Tillandsia landbeckii_1_Tillandsia_subg_Diaphoranthema	0	1564	2	100.0%	100.0%	32.0%		1445.2	plastid Tillandsia landbeckii subsp. andina	Wed Jan 30 10:43:42 CET 2019	matK Extraction I	0	true	Bacterial	100.0%
		Tillandsia usneoides MB-83 tRNA-Lys (trnK) gene, partial sequence; and maturase K (matK) gene, complete cds; chloroplast	AY614122_Tillandsia usneoides_1_Tillandsia_subg_Diaphoranthema	0	1564	2	99.9%	99.9%	31.8%		1439.66	chloroplast Tillandsia usneoides	Wed Jan 30 10:43:42 CET 2019	matK Extraction I	0	true	Bacterial	99.9%
		Tillandsia albertiana isolate B212 trnK-UUU gene, partial sequence; and maturase K (matK) gene, complete cds; plastid	KX754127	0	1564	2	99.6%	99.6%	32.4%		1428.58	plastid Tillandsia albertiana	Wed Jan 30 10:43:42 CET 2019	matK Extraction I	0	true	Bacterial	99.8%
		Tillandsia esseriana MB-69 tRNA-Lys (trnK) gene, partial sequence; and maturase K (matK) gene, complete cds; chloroplast	AY614120	0	1564	2	99.6%	99.6%	32.4%		1428.58	chloroplast Tillandsia esseriana	Wed Jan 30 10:43:42 CET 2019	matK Extraction I	0	true	Bacterial	99.8%
		Tillandsia albertiana MB-33 tRNA-Lys (trnK) gene, partial sequence; and maturase K (matK) gene, complete cds; chloroplast	AY614117	0	1564	2	99.6%	99.6%	32.4%		1428.58	chloroplast Tillandsia albertiana	Wed Jan 30 10:43:42 CET 2019	matK Extraction I	0	true	Bacterial	99.8%
		Tillandsia capillaris isolate B1592 trnK-UUU gene, partial sequence; and maturase K (matK) gene, complete cds; plastid	KX754232_Tillandsia capillaris_1_Tillandsia_subg_Diaphoranthema	0	1564	2	99.5%	99.5%	32.2%		1423.04	plastid Tillandsia capillaris	Wed Jan 30 10:43:42 CET 2019	matK Extraction I	0	true	Bacterial	99.7%
		Tillandsia capillaris isolate B916 trnK-UUU gene, partial sequence; and maturase K (matK) gene, complete cds; plastid	KX754206_Tillandsia capillaris_1_Tillandsia_subg_Diaphoranthema	0	1564	2	99.5%	99.5%	32.2%		1423.04	plastid Tillandsia capillaris	Wed Jan 30 10:43:42 CET 2019	matK Extraction I	0	true	Bacterial	99.7%
		Tillandsia recurvata isolate B529 trnK-UUU gene, partial sequence; and maturase K (matK) gene, complete cds; plastid	KX754174_Tillandsia recurvata_1_Tillandsia_subg_Diaphoranthema	0	1564	2	99.5%	99.5%	32.5%		1423.04	Renealmia recurvata L.	Wed Jan 30 10:43:42 CET 2019	matK Extraction I	0	true	Bacterial	99.7%
		Tillandsia paleacea isolate B404 trnK-UUU gene, partial sequence; and maturase K (matK) gene, complete cds; plastid	KX754160_Tillandsia paleacea var. Minor_4_Tillandsia_subg_Phytarrhiza	0	1564	2	99.5%	99.5%	32.2%		1423.04	plastid Tillandsia paleacea	Wed Jan 30 10:43:42 CET 2019	matK Extraction I	0	true	Bacterial	99.7%
		Tillandsia kirschnekii isolate B384 trnK-UUU gene, partial sequence; and maturase K (matK) gene, complete cds; plastid	KX754155_Tillandsia kirschnekii_4_Tillandsia_subg_Phytarrhiza	0	1564	2	99.5%	99.5%	32.2%		1423.04	plastid Tillandsia kirschnekii	Wed Jan 30 10:43:42 CET 2019	matK Extraction I	0	true	Bacterial	99.7%
		MegaBLAST results - only first 10 hits shown	GeneBank_ID	# Nucleotide Sequences With Mates	# Nucleotides	# Sequences	% Identical Sites	% Pairwise Identity	%GC	Accession	Bit-Score	Common Name	Created Date	Database	E Value	Free end gaps	Genetic Code	Grade
	AY614127_ Tillandsia didisticha	Tillandsia lotteae isolate B822 trnK-UUU gene, partial sequence; and maturase K (matK) gene, complete cds; plastid	KX754204	0	1564	2	100.0%	100.0%	32.6%		1445.2	plastid Tillandsia lotteae	Wed Jan 30 09:52:21 CET 2019	matK Extraction I	0	true	Bacterial	100.0%
		Tillandsia lotteae isolate B820 trnK-UUU gene, partial sequence; and maturase K (matK) gene, complete cds; plastid	KX754203	0	1564	2	100.0%	100.0%	32.6%		1445.2	plastid Tillandsia lotteae	Wed Jan 30 09:52:21 CET 2019	matK Extraction I	0	true	Bacterial	100.0%
		Tillandsia argentina MB-87 tRNA-Lys (trnK) gene, partial sequence; and maturase K (matK) gene, complete cds; chloroplast	AY614124	0	1564	2	100.0%	100.0%	32.6%		1445.2	chloroplast Tillandsia argentina	Wed Jan 30 09:52:21 CET 2019	matK Extraction I	0	true	Bacterial	100.0%
		Tillandsia cochabambae isolate B392 trnK-UUU gene, partial sequence; and maturase K (matK) gene, complete cds; plastid	KX754158_Tillandsia cochabambae_3_Tillandsia_subg_Aerobia	0	1564	2	99.9%	99.9%	32.5%		1439.66	plastid Tillandsia cochabambae	Wed Jan 30 09:52:21 CET 2019	matK Extraction I	0	true	Bacterial	99.9%
		Tillandsia xiphioides var. xiphioides MB-40 tRNA-Lys (trnK) gene, partial sequence; and maturase K (matK) gene, complete cds; chloroplast	AY614125_Tillandsia xiphioides_3_Tillandsia_subg_Aerobia	0	1564	2	99.9%	99.9%	32.5%		1439.66	chloroplast Tillandsia xiphioides var. xiphioides	Wed Jan 30 09:52:21 CET 2019	matK Extraction I	0	true	Bacterial	99.9%
		Tillandsia bermejoensis MB-34 tRNA-Lys (trnK) gene, partial sequence; and maturase K (matK) gene, complete cds; chloroplast	AY614123_Tillandsia bermejoensis_3_Tillandsia_subg_Aerobia	0	1564	2	99.9%	99.9%	32.5%		1439.66	chloroplast Tillandsia bermejoensis	Wed Jan 30 09:52:21 CET 2019	matK Extraction I	0	true	Bacterial	99.9%
		Tillandsia albertiana isolate B212 trnK-UUU gene, partial sequence; and maturase K (matK) gene, complete cds; plastid	KX754127	0	1564	2	99.7%	99.7%	32.4%		1434.12	plastid Tillandsia albertiana	Wed Jan 30 09:52:21 CET 2019	matK Extraction I	0	true	Bacterial	99.9%
		Tillandsia esseriana MB-69 tRNA-Lys (trnK) gene, partial sequence; and maturase K (matK) gene, complete cds; chloroplast	AY614120	0	1564	2	99.7%	99.7%	32.4%		1434.12	chloroplast Tillandsia esseriana	Wed Jan 30 09:52:21 CET 2019	matK Extraction I	0	true	Bacterial	99.9%
		Tillandsia albertiana MB-33 tRNA-Lys (trnK) gene, partial sequence; and maturase K (matK) gene, complete cds; chloroplast	AY614117	0	1564	2	99.7%	99.7%	32.4%		1434.12	chloroplast Tillandsia albertiana	Wed Jan 30 09:52:21 CET 2019	matK Extraction I	0	true	Bacterial	99.9%
		Tillandsia capillaris isolate B1592 trnK-UUU gene, partial sequence; and maturase K (matK) gene, complete cds; plastid	KX754232_Tillandsia capillaris_1_Tillandsia_subg_Diaphoranthema	0	1564	2	99.6%	99.6%	32.2%		1428.58	plastid Tillandsia capillaris	Wed Jan 30 09:52:21 CET 2019	matK Extraction I	0	true	Bacterial	99.8%
		MegaBLAST results - only first 10 hits shown	GeneBank_ID	# Nucleotide Sequences With Mates	# Nucleotides	# Sequences	% Identical Sites	% Pairwise Identity	%GC	Accession	Bit-Score	Common Name	Created Date	Database	E Value	Free end gaps	Genetic Code	Grade
	AY950029_Aechmea lueddemanniana	Aechmea lueddemanniana voucher MSBG 1997-0147A (Living specimen) trnK gene, partial sequence; and maturase K (matK) gene, complete cds; chloroplast	KU762879_Aechmea lueddemanniana _24_Central_American_group	0	1564	2	100.0%	100.0%	33.1%		1445.2	chloroplast Aechmea lueddemanniana	Wed Jan 30 09:10:59 CET 2019	matK Extraction I	0	true	Bacterial	100.0%
		Ananas nanus voucher MSBG 1197-1 foster (Living specimen) trnK gene, partial sequence; and maturase K (matK) gene, complete cds; chloroplast	KU762815	0	1564	2	100.0%	100.0%	33.1%		1445.2	chloroplast Ananas comosus var. microstachys	Wed Jan 30 09:10:58 CET 2019	matK Extraction I	0	true	Bacterial	100.0%
		Ananas comosus voucher Holst 6244 (SEL) trnK gene, partial sequence; and maturase K (matK) gene, complete cds; chloroplast	KU762814	0	1564	2	100.0%	100.0%	33.1%		1445.2	pineapple	Wed Jan 30 09:10:59 CET 2019	matK Extraction I	0	true	Bacterial	100.0%
		Lymania corallina voucher MSBG 1996-0662A (Living specimen) trnK gene, partial sequence; and maturase K (matK) gene, complete cds; chloroplast	KU762801	0	1564	2	100.0%	100.0%	33.1%		1445.2	chloroplast Lymania corallina	Wed Jan 30 09:10:58 CET 2019	matK Extraction I	0	true	Bacterial	100.0%
		Ananas ananassoides maturase K (matK) gene, complete cds; chloroplast	KU659085	0	1564	2	100.0%	100.0%	33.1%		1445.2	chloroplast Ananas comosus var. microstachys	Wed Jan 30 09:10:58 CET 2019	matK Extraction I	0	true	Bacterial	100.0%
		Ananas ananassoides maturase K (matK) gene, complete cds; chloroplast	KU659084	0	1564	2	100.0%	100.0%	33.1%		1445.2	chloroplast Ananas comosus var. microstachys	Wed Jan 30 09:10:58 CET 2019	matK Extraction I	0	true	Bacterial	100.0%
		Ananas comosus var. parguazensis maturase K (matK) gene, partial cds; chloroplast	KU258042	0	1564	2	100.0%	100.0%	33.1%		1445.2	chloroplast Ananas comosus var. parguazensis	Wed Jan 30 09:10:58 CET 2019	matK Extraction I	0	true	Bacterial	100.0%
		Ananas nanus maturase K (matK) gene, complete cds; chloroplast	KU258041	0	1564	2	100.0%	100.0%	33.1%		1445.2	chloroplast Ananas comosus var. microstachys	Wed Jan 30 09:10:58 CET 2019	matK Extraction I	0	true	Bacterial	100.0%
		Ananas fritzmuelleri maturase K (matK) gene, complete cds; chloroplast	KU258040	0	1564	2	100.0%	100.0%	33.1%		1445.2	chloroplast Ananas comosus var. bracteatus	Wed Jan 30 09:10:58 CET 2019	matK Extraction I	0	true	Bacterial	100.0%
		Ananas comosus maturase K (matK) gene, complete cds; chloroplast	KU258039	0	1564	2	100.0%	100.0%	33.1%		1445.2	pineapple	Wed Jan 30 09:10:59 CET 2019	matK Extraction I	0	true	Bacterial	100.0%
		MegaBLAST results - only first 10 hits shown	GeneBank_ID	# Nucleotide Sequences With Mates	# Nucleotides	# Sequences	% Identical Sites	% Pairwise Identity	%GC	Accession	Bit-Score	Common Name	Created Date	Database	E Value	Free end gaps	Genetic Code	Grade
	AY950033_Aechmea fulgens	Aechmea racinae maturase K (matK) gene, partial cds; chloroplast	JF295089_Aechmea racinae_15_Lymania_Aechmea_subgen_Lamprococcus_group	0	1564	2	99.9%	99.9%	33.0%		1439.66	chloroplast Aechmea racinae	Wed Jan 30 09:09:19 CET 2019	matK Extraction I	0	true	Bacterial	99.9%
		Portea petropolitana var. extensa isolate H053 tRNA-Lys (trnK) gene, partial sequence; and maturase K (matK) gene, complete cds; chloroplast	AY950053	0	1564	2	99.9%	99.9%	33.0%		1439.66	chloroplast Portea petropolitana var. extensa	Wed Jan 30 09:09:19 CET 2019	matK Extraction I	0	true	Bacterial	99.9%
		Aechmea fosteriana voucher NYBG 661/64B (Living specimen) trnK gene, partial sequence; and maturase K (matK) gene, complete cds; chloroplast	KU762888_Aechmea fosteriana_13_Cucullatanthus_group	0	1564	2	99.7%	99.7%	33.0%		1434.12	chloroplast Aechmea fosteriana	Wed Jan 30 09:09:20 CET 2019	matK Extraction I	0	true	Bacterial	99.9%
		Aechmea lueddemanniana voucher MSBG 1997-0147A (Living specimen) trnK gene, partial sequence; and maturase K (matK) gene, complete cds; chloroplast	KU762879_Aechmea lueddemanniana _24_Central_American_group	0	1564	2	99.7%	99.7%	33.1%		1434.12	chloroplast Aechmea lueddemanniana	Wed Jan 30 09:09:20 CET 2019	matK Extraction I	0	true	Bacterial	99.9%
		Aechmea patriciae voucher MSBG 1999-0090A (Living specimen) trnK gene, partial sequence; and maturase K (matK) gene, complete cds; chloroplast	KU762868_Aechmea patriciae_8_Princ_Amazonina_Aechmea_group	0	1564	2	99.7%	99.7%	32.9%		1434.12	chloroplast Aechmea patriciae	Wed Jan 30 09:09:20 CET 2019	matK Extraction I	0	true	Bacterial	99.9%
		Ananas nanus voucher MSBG 1197-1 foster (Living specimen) trnK gene, partial sequence; and maturase K (matK) gene, complete cds; chloroplast	KU762815	0	1564	2	99.7%	99.7%	33.1%		1434.12	chloroplast Ananas comosus var. microstachys	Wed Jan 30 09:09:20 CET 2019	matK Extraction I	0	true	Bacterial	99.9%
		Ananas comosus voucher Holst 6244 (SEL) trnK gene, partial sequence; and maturase K (matK) gene, complete cds; chloroplast	KU762814	0	1564	2	99.7%	99.7%	33.1%		1434.12	pineapple	Wed Jan 30 09:09:20 CET 2019	matK Extraction I	0	true	Bacterial	99.9%
		Lymania corallina voucher MSBG 1996-0662A (Living specimen) trnK gene, partial sequence; and maturase K (matK) gene, complete cds; chloroplast	KU762801	0	1564	2	99.7%	99.7%	33.1%		1434.12	chloroplast Lymania corallina	Wed Jan 30 09:09:19 CET 2019	matK Extraction I	0	true	Bacterial	99.9%
		Ananas ananassoides maturase K (matK) gene, complete cds; chloroplast	KU659085	0	1564	2	99.7%	99.7%	33.1%		1434.12	chloroplast Ananas comosus var. microstachys	Wed Jan 30 09:09:20 CET 2019	matK Extraction I	0	true	Bacterial	99.9%
		Ananas ananassoides maturase K (matK) gene, complete cds; chloroplast	KU659084	0	1564	2	99.7%	99.7%	33.1%		1434.12	chloroplast Ananas comosus var. microstachys	Wed Jan 30 09:09:20 CET 2019	matK Extraction I	0	true	Bacterial	99.9%
		MegaBLAST results - only first 10 hits shown	GeneBank_ID	# Nucleotide Sequences With Mates	# Nucleotides	# Sequences	% Identical Sites	% Pairwise Identity	%GC	Accession	Bit-Score	Common Name	Created Date	Database	E Value	Free end gaps	Genetic Code	Grade
	AY950034_Aechmea fasciata	Aechmea dealbata voucher MSBG 1975-0009-100A, HBG 35632 (Living specimen) trnK gene, partial sequence; and maturase K (matK) gene, complete cds; chloroplast	KU762754	0	1564	2	100.0%	100.0%	33.1%		1445.2	chloroplast Aechmea dealbata	Wed Jan 30 09:08:51 CET 2019	matK Extraction I	0	true	Bacterial	100.0%
		Aechmea caesia voucher MSBG 1986-0293A (Living specimen) trnK gene, partial sequence; and maturase K (matK) gene, complete cds; chloroplast	KU762753	0	1564	2	100.0%	100.0%	33.1%		1445.2	chloroplast Aechmea caesia	Wed Jan 30 09:08:51 CET 2019	matK Extraction I	0	true	Bacterial	100.0%
		Aechmea fasciata voucher NYBG 979/97E (Living specimen) trnK gene, partial sequence; and maturase K (matK) gene, complete cds; chloroplast	KU762752_Aechmea fasciata_18_Billbergia_Quesnelia_subgen_Billbergiopsis_Aechmea_subgen_Aechmea_group	0	1564	2	100.0%	100.0%	33.1%		1445.2	chloroplast Aechmea fasciata	Wed Jan 30 09:08:51 CET 2019	matK Extraction I	0	true	Bacterial	100.0%
		Quesnelia kautskyi maturase K (matK) gene, partial cds; chloroplast	JN202270_Quesnelia kautskyi_18_Billbergia_Quesnelia_subgen_Billbergiopsis_Aechmea_subgen_Aechmea_group	0	1564	2	99.9%	99.9%	33.0%		1439.66	chloroplast Quesnelia kautskyi	Wed Jan 30 09:08:51 CET 2019	matK Extraction I	0	true	Bacterial	99.9%
		Quesnelia kautskyi maturase K (matK) gene, partial cds; chloroplast	JN202269_Quesnelia kautskyi_18_Billbergia_Quesnelia_subgen_Billbergiopsis_Aechmea_subgen_Aechmea_group	0	1564	2	99.9%	99.9%	33.0%		1439.66	chloroplast Quesnelia kautskyi	Wed Jan 30 09:08:51 CET 2019	matK Extraction I	0	true	Bacterial	99.9%
		Billbergia euphemiae maturase K (matK) gene, partial cds; chloroplast	JN202237_Billbergia euphemiae_18_Billbergia_Quesnelia_subgen_Billbergiopsis_Aechmea_subgen_Aechmea_group	0	1564	2	99.9%	99.9%	33.0%		1439.66	chloroplast Billbergia euphemiae	Wed Jan 30 09:08:51 CET 2019	matK Extraction I	0	true	Bacterial	99.9%
		Aechmea phanerophlebia maturase K (matK) gene, partial cds; chloroplast	JN202229_Aechmea phanerophlebia_22_Quesnelia_subgen_Quesneliana_Aechmea_group	0	1564	2	99.9%	99.9%	33.0%		1439.66	chloroplast Aechmea phanerophlebia	Wed Jan 30 09:08:51 CET 2019	matK Extraction I	0	true	Bacterial	99.9%
		Aechmea phanerophlebia maturase K (matK) gene, partial cds; chloroplast	JN202227_Aechmea phanerophlebia_22_Quesnelia_subgen_Quesneliana_Aechmea_group	0	1564	2	99.9%	99.9%	33.0%		1439.66	chloroplast Aechmea phanerophlebia	Wed Jan 30 09:08:51 CET 2019	matK Extraction I	0	true	Bacterial	99.9%
		Aechmea distichantha maturase K (matK) gene, partial cds; chloroplast	JN202221	0	1564	2	99.9%	99.9%	33.0%		1439.66	chloroplast Aechmea distichantha	Wed Jan 30 09:08:51 CET 2019	matK Extraction I	0	true	Bacterial	99.9%
		Quesnelia liboniana isolate H220 tRNA-Lys (trnK) gene, partial sequence; and maturase K (matK) gene, complete cds; chloroplast	AY950048_Quesnelia liboniana_18_Billbergia_Quesnelia_subgen_Billbergiopsis_Aechmea_subgen_Aechmea_group	0	1564	2	99.9%	99.9%	33.0%		1439.66	chloroplast Quesnelia liboniana	Wed Jan 30 09:08:51 CET 2019	matK Extraction I	0	true	Bacterial	99.9%
		MegaBLAST results - only first 10 hits shown	GeneBank_ID	# Nucleotide Sequences With Mates	# Nucleotides	# Sequences	% Identical Sites	% Pairwise Identity	%GC	Accession	Bit-Score	Common Name	Created Date	Database	E Value	Free end gaps	Genetic Code	Grade
	EU681839 - Fosterella caulescens	Fosterella albicans isolate B032 tRNA-Lys (trnK) gene, intron; and maturase K (matK) gene, complete cds; chloroplast	HQ167789	0	1564	2	100.0%	100.0%	33.0%		1445.2	chloroplast Fosterella albicans	Wed Jan 30 09:34:35 CET 2019	matK Extraction I	0	true	Bacterial	100.0%
		Fosterella albicans isolate B031 tRNA-Lys (trnK) gene, intron; and maturase K (matK) gene, complete cds; chloroplast	HQ167788	0	1564	2	100.0%	100.0%	33.0%		1445.2	chloroplast Fosterella albicans	Wed Jan 30 09:34:35 CET 2019	matK Extraction I	0	true	Bacterial	100.0%
		Fosterella caulescens isolate 80a tRNA-Lys (trnK) gene, partial sequence; and maturase K (matK) gene, partial cds; chloroplast	EU681845	0	1564	2	100.0%	100.0%	33.0%		1445.2	chloroplast Fosterella caulescens	Wed Jan 30 09:34:35 CET 2019	matK Extraction I	0	true	Bacterial	100.0%
		Fosterella albicans isolate 62a tRNA-Lys (trnK) gene, partial sequence; and maturase K (matK) gene, complete cds; chloroplast	EU681843	0	1564	2	100.0%	100.0%	33.0%		1445.2	chloroplast Fosterella albicans	Wed Jan 30 09:34:35 CET 2019	matK Extraction I	0	true	Bacterial	100.0%
		Fosterella caulescens isolate 3a tRNA-Lys (trnK) gene, partial sequence; and maturase K (matK) gene, complete cds; chloroplast	EU681840	0	1564	2	100.0%	100.0%	33.0%		1445.2	chloroplast Fosterella caulescens	Wed Jan 30 09:34:35 CET 2019	matK Extraction I	0	true	Bacterial	100.0%
		Fosterella albicans isolate 94c tRNA-Lys (trnK) gene, partial sequence; and maturase K (matK) gene, complete cds; chloroplast	EU681838	0	1564	2	100.0%	100.0%	33.0%		1445.2	chloroplast Fosterella albicans	Wed Jan 30 09:34:35 CET 2019	matK Extraction I	0	true	Bacterial	100.0%
		Fosterella caulescens isolate H158 tRNA-Lys (trnK) gene, partial sequence; and maturase K (matK) gene, complete cds; chloroplast	AY949995	0	1564	2	100.0%	100.0%	33.0%		1445.2	chloroplast Fosterella caulescens	Wed Jan 30 09:34:35 CET 2019	matK Extraction I	0	true	Bacterial	100.0%
		Fosterella rusbyi isolate 107b tRNA-Lys (trnK) gene, partial sequence; and maturase K (matK) gene, complete cds; chloroplast	EU681842	0	1564	2	99.9%	99.9%	33.0%		1441.51	chloroplast Fosterella rusbyi	Wed Jan 30 09:34:35 CET 2019	matK Extraction I	0	true	Bacterial	100.0%
		Fosterella petiolata isolate B017 tRNA-Lys (trnK) gene, intron; and maturase K (matK) gene, complete cds; chloroplast	HQ167778	0	1564	2	99.9%	99.9%	33.1%		1439.66	chloroplast Fosterella petiolata	Wed Jan 30 09:34:35 CET 2019	matK Extraction I	0	true	Bacterial	99.9%
		Fosterella petiolata maturase K (matK) gene, complete cds; chloroplast	AF162242	0	1564	2	99.9%	99.9%	33.1%		1439.66	chloroplast Fosterella petiolata	Wed Jan 30 09:34:35 CET 2019	matK Extraction I	0	true	Bacterial	99.9%
		MegaBLAST results - only first 10 hits shown	GeneBank_ID	# Nucleotide Sequences With Mates	# Nucleotides	# Sequences	% Identical Sites	% Pairwise Identity	%GC	Accession	Bit-Score	Common Name	Created Date	Database	E Value	Free end gaps	Genetic Code	Grade
	EU681851 - Fosterella windischii	Fosterella rusbyi isolate B020 tRNA-Lys (trnK) gene, intron; and maturase K (matK) gene, complete cds; chloroplast	HQ167781	0	1564	2	100.0%	100.0%	33.2%		1445.2	chloroplast Fosterella rusbyi	Wed Jan 30 09:41:34 CET 2019	matK Extraction I	0	true	Bacterial	100.0%
		Fosterella vasquezii isolate 63b tRNA-Lys (trnK) gene, partial sequence; and maturase K (matK) gene, complete cds; chloroplast	EU681856	0	1564	2	100.0%	100.0%	33.2%		1445.2	chloroplast Fosterella vasquezii	Wed Jan 30 09:41:34 CET 2019	matK Extraction I	0	true	Bacterial	100.0%
		Fosterella vasquezii isolate 23a tRNA-Lys (trnK) gene, partial sequence; and maturase K (matK) gene, complete cds; chloroplast	EU681855	0	1564	2	100.0%	100.0%	33.2%		1445.2	chloroplast Fosterella vasquezii	Wed Jan 30 09:41:34 CET 2019	matK Extraction I	0	true	Bacterial	100.0%
		Fosterella rusbyi isolate 60a tRNA-Lys (trnK) gene, partial sequence; and maturase K (matK) gene, complete cds; chloroplast	EU681854	0	1564	2	100.0%	100.0%	33.2%		1445.2	chloroplast Fosterella rusbyi	Wed Jan 30 09:41:34 CET 2019	matK Extraction I	0	true	Bacterial	100.0%
		Fosterella windischii isolate B021 tRNA-Lys (trnK) gene, intron; and maturase K (matK) gene, complete cds; chloroplast	HQ167782	0	1564	2	99.9%	99.9%	33.2%		1439.66	chloroplast Fosterella windischii	Wed Jan 30 09:41:34 CET 2019	matK Extraction I	0	true	Bacterial	99.9%
		Fosterella robertreadii isolate B019 tRNA-Lys (trnK) gene, intron; and maturase K (matK) gene, complete cds; chloroplast	HQ167780	0	1564	2	99.6%	99.6%	32.9%		1428.58	chloroplast Fosterella robertreadii	Wed Jan 30 09:41:34 CET 2019	matK Extraction I	0	true	Bacterial	99.8%
		Fosterella petiolata isolate B017 tRNA-Lys (trnK) gene, intron; and maturase K (matK) gene, complete cds; chloroplast	HQ167778	0	1564	2	99.6%	99.6%	33.1%		1428.58	chloroplast Fosterella petiolata	Wed Jan 30 09:41:34 CET 2019	matK Extraction I	0	true	Bacterial	99.8%
		Fosterella robertreadii isolate 137b tRNA-Lys (trnK) gene, partial sequence; and maturase K (matK) gene, complete cds; chloroplast	EU681922	0	1564	2	99.6%	99.6%	32.9%		1428.58	chloroplast Fosterella robertreadii	Wed Jan 30 09:41:34 CET 2019	matK Extraction I	0	true	Bacterial	99.8%
		Fosterella schidosperma isolate 86a tRNA-Lys (trnK) gene, partial sequence; and maturase K (matK) gene, complete cds; chloroplast	EU681912	0	1564	2	99.6%	99.6%	32.9%		1428.58	chloroplast Fosterella schidosperma	Wed Jan 30 09:41:34 CET 2019	matK Extraction I	0	true	Bacterial	99.8%
		Fosterella robertreadii isolate 135b tRNA-Lys (trnK) gene, partial sequence; and maturase K (matK) gene, complete cds; chloroplast	EU681847	0	1564	2	99.6%	99.6%	32.9%		1428.58	chloroplast Fosterella robertreadii	Wed Jan 30 09:41:34 CET 2019	matK Extraction I	0	true	Bacterial	99.8%
		MegaBLAST results - only first 10 hits shown	GeneBank_ID	# Nucleotide Sequences With Mates	# Nucleotides	# Sequences	% Identical Sites	% Pairwise Identity	%GC	Accession	Bit-Score	Common Name	Created Date	Database	E Value	Free end gaps	Genetic Code	Grade
	EU681853 - Fosterella rusbyi	Fosterella rusbyi isolate B020 tRNA-Lys (trnK) gene, intron; and maturase K (matK) gene, complete cds; chloroplast	HQ167781	0	1564	2	100.0%	100.0%	33.2%		1445.2	chloroplast Fosterella rusbyi	Wed Jan 30 09:38:18 CET 2019	matK Extraction I	0	true	Bacterial	100.0%
		Fosterella vasquezii isolate 63b tRNA-Lys (trnK) gene, partial sequence; and maturase K (matK) gene, complete cds; chloroplast	EU681856	0	1564	2	100.0%	100.0%	33.2%		1445.2	chloroplast Fosterella vasquezii	Wed Jan 30 09:38:18 CET 2019	matK Extraction I	0	true	Bacterial	100.0%
		Fosterella vasquezii isolate 23a tRNA-Lys (trnK) gene, partial sequence; and maturase K (matK) gene, complete cds; chloroplast	EU681855	0	1564	2	100.0%	100.0%	33.2%		1445.2	chloroplast Fosterella vasquezii	Wed Jan 30 09:38:18 CET 2019	matK Extraction I	0	true	Bacterial	100.0%
		Fosterella rusbyi isolate 60a tRNA-Lys (trnK) gene, partial sequence; and maturase K (matK) gene, complete cds; chloroplast	EU681854	0	1564	2	100.0%	100.0%	33.2%		1445.2	chloroplast Fosterella rusbyi	Wed Jan 30 09:38:18 CET 2019	matK Extraction I	0	true	Bacterial	100.0%
		Fosterella windischii isolate B021 tRNA-Lys (trnK) gene, intron; and maturase K (matK) gene, complete cds; chloroplast	HQ167782	0	1564	2	99.9%	99.9%	33.2%		1439.66	chloroplast Fosterella windischii	Wed Jan 30 09:38:18 CET 2019	matK Extraction I	0	true	Bacterial	99.9%
		Fosterella robertreadii isolate B019 tRNA-Lys (trnK) gene, intron; and maturase K (matK) gene, complete cds; chloroplast	HQ167780	0	1564	2	99.6%	99.6%	32.9%		1428.58	chloroplast Fosterella robertreadii	Wed Jan 30 09:38:18 CET 2019	matK Extraction I	0	true	Bacterial	99.8%
		Fosterella petiolata isolate B017 tRNA-Lys (trnK) gene, intron; and maturase K (matK) gene, complete cds; chloroplast	HQ167778	0	1564	2	99.6%	99.6%	33.1%		1428.58	chloroplast Fosterella petiolata	Wed Jan 30 09:38:18 CET 2019	matK Extraction I	0	true	Bacterial	99.8%
		Fosterella robertreadii isolate 137b tRNA-Lys (trnK) gene, partial sequence; and maturase K (matK) gene, complete cds; chloroplast	EU681922	0	1564	2	99.6%	99.6%	32.9%		1428.58	chloroplast Fosterella robertreadii	Wed Jan 30 09:38:18 CET 2019	matK Extraction I	0	true	Bacterial	99.8%
		Fosterella schidosperma isolate 86a tRNA-Lys (trnK) gene, partial sequence; and maturase K (matK) gene, complete cds; chloroplast	EU681912	0	1564	2	99.6%	99.6%	32.9%		1428.58	chloroplast Fosterella schidosperma	Wed Jan 30 09:38:18 CET 2019	matK Extraction I	0	true	Bacterial	99.8%
		Fosterella robertreadii isolate 135b tRNA-Lys (trnK) gene, partial sequence; and maturase K (matK) gene, complete cds; chloroplast	EU681847	0	1564	2	99.6%	99.6%	32.9%		1428.58	chloroplast Fosterella robertreadii	Wed Jan 30 09:38:18 CET 2019	matK Extraction I	0	true	Bacterial	99.8%
		MegaBLAST results - only first 10 hits shown	GeneBank_ID	# Nucleotide Sequences With Mates	# Nucleotides	# Sequences	% Identical Sites	% Pairwise Identity	%GC	Accession	Bit-Score	Common Name	Created Date	Database	E Value	Free end gaps	Genetic Code	Grade
	EU681865 - Fosterella villosula	Fosterella caulescens maturase K (matK) gene, partial cds; plastid	HQ180866	0	1564	2	100.0%	100.0%	32.7%		1445.2	plastid Fosterella caulescens	Wed Jan 30 09:38:43 CET 2019	matK Extraction I	0	true	Bacterial	100.0%
		Fosterella penduliflora isolate B035 tRNA-Lys (trnK) gene, intron; and maturase K (matK) gene, complete cds; chloroplast	HQ167792	0	1564	2	100.0%	100.0%	32.7%		1445.2	chloroplast Fosterella penduliflora	Wed Jan 30 09:38:43 CET 2019	matK Extraction I	0	true	Bacterial	100.0%
		Fosterella penduliflora isolate B015 tRNA-Lys (trnK) gene, intron; and maturase K (matK) gene, complete cds; chloroplast	HQ167776	0	1564	2	100.0%	100.0%	32.7%		1445.2	chloroplast Fosterella penduliflora	Wed Jan 30 09:38:43 CET 2019	matK Extraction I	0	true	Bacterial	100.0%
		Fosterella penduliflora isolate B014 tRNA-Lys (trnK) gene, intron; and maturase K (matK) gene, complete cds; chloroplast	HQ167775	0	1564	2	100.0%	100.0%	32.7%		1445.2	chloroplast Fosterella penduliflora	Wed Jan 30 09:38:43 CET 2019	matK Extraction I	0	true	Bacterial	100.0%
		Fosterella gracilis isolate 117a tRNA-Lys (trnK) gene, partial sequence; and maturase K (matK) gene, complete cds; chloroplast	EU681923	0	1564	2	100.0%	100.0%	32.7%		1445.2	chloroplast Fosterella gracilis	Wed Jan 30 09:38:43 CET 2019	matK Extraction I	0	true	Bacterial	100.0%
		Fosterella penduliflora isolate 34a tRNA-Lys (trnK) gene, partial sequence; and maturase K (matK) gene, complete cds; chloroplast	EU681919	0	1564	2	100.0%	100.0%	32.7%		1445.2	chloroplast Fosterella penduliflora	Wed Jan 30 09:38:43 CET 2019	matK Extraction I	0	true	Bacterial	100.0%
		Fosterella penduliflora isolate 93a tRNA-Lys (trnK) gene, partial sequence; and maturase K (matK) gene, complete cds; chloroplast	EU681914	0	1564	2	100.0%	100.0%	32.7%		1445.2	chloroplast Fosterella penduliflora	Wed Jan 30 09:38:43 CET 2019	matK Extraction I	0	true	Bacterial	100.0%
		Fosterella penduliflora isolate 55a tRNA-Lys (trnK) gene, partial sequence; and maturase K (matK) gene, complete cds; chloroplast	EU681874	0	1564	2	100.0%	100.0%	32.7%		1445.2	chloroplast Fosterella penduliflora	Wed Jan 30 09:38:43 CET 2019	matK Extraction I	0	true	Bacterial	100.0%
		Fosterella penduliflora isolate 50b tRNA-Lys (trnK) gene, partial sequence; and maturase K (matK) gene, complete cds; chloroplast	EU681871	0	1564	2	100.0%	100.0%	32.7%		1445.2	chloroplast Fosterella penduliflora	Wed Jan 30 09:38:43 CET 2019	matK Extraction I	0	true	Bacterial	100.0%
		Fosterella penduliflora isolate 35a tRNA-Lys (trnK) gene, partial sequence; and maturase K (matK) gene, complete cds; chloroplast	EU681870	0	1564	2	100.0%	100.0%	32.7%		1445.2	chloroplast Fosterella penduliflora	Wed Jan 30 09:38:43 CET 2019	matK Extraction I	0	true	Bacterial	100.0%
		MegaBLAST results - only first 10 hits shown	GeneBank_ID	# Nucleotide Sequences With Mates	# Nucleotides	# Sequences	% Identical Sites	% Pairwise Identity	%GC	Accession	Bit-Score	Common Name	Created Date	Database	E Value	Free end gaps	Genetic Code	Grade
	EU681866 - Fosterella penduliflora	Fosterella caulescens maturase K (matK) gene, partial cds; plastid	HQ180866	0	1564	2	100.0%	100.0%	32.7%		1445.2	plastid Fosterella caulescens	Wed Jan 30 09:36:37 CET 2019	matK Extraction I	0	true	Bacterial	100.0%
		Fosterella penduliflora isolate B035 tRNA-Lys (trnK) gene, intron; and maturase K (matK) gene, complete cds; chloroplast	HQ167792	0	1564	2	100.0%	100.0%	32.7%		1445.2	chloroplast Fosterella penduliflora	Wed Jan 30 09:36:37 CET 2019	matK Extraction I	0	true	Bacterial	100.0%
		Fosterella penduliflora isolate B015 tRNA-Lys (trnK) gene, intron; and maturase K (matK) gene, complete cds; chloroplast	HQ167776	0	1564	2	100.0%	100.0%	32.7%		1445.2	chloroplast Fosterella penduliflora	Wed Jan 30 09:36:37 CET 2019	matK Extraction I	0	true	Bacterial	100.0%
		Fosterella penduliflora isolate B014 tRNA-Lys (trnK) gene, intron; and maturase K (matK) gene, complete cds; chloroplast	HQ167775	0	1564	2	100.0%	100.0%	32.7%		1445.2	chloroplast Fosterella penduliflora	Wed Jan 30 09:36:37 CET 2019	matK Extraction I	0	true	Bacterial	100.0%
		Fosterella gracilis isolate 117a tRNA-Lys (trnK) gene, partial sequence; and maturase K (matK) gene, complete cds; chloroplast	EU681923	0	1564	2	100.0%	100.0%	32.7%		1445.2	chloroplast Fosterella gracilis	Wed Jan 30 09:36:37 CET 2019	matK Extraction I	0	true	Bacterial	100.0%
		Fosterella penduliflora isolate 34a tRNA-Lys (trnK) gene, partial sequence; and maturase K (matK) gene, complete cds; chloroplast	EU681919	0	1564	2	100.0%	100.0%	32.7%		1445.2	chloroplast Fosterella penduliflora	Wed Jan 30 09:36:37 CET 2019	matK Extraction I	0	true	Bacterial	100.0%
		Fosterella penduliflora isolate 93a tRNA-Lys (trnK) gene, partial sequence; and maturase K (matK) gene, complete cds; chloroplast	EU681914	0	1564	2	100.0%	100.0%	32.7%		1445.2	chloroplast Fosterella penduliflora	Wed Jan 30 09:36:37 CET 2019	matK Extraction I	0	true	Bacterial	100.0%
		Fosterella penduliflora isolate 55a tRNA-Lys (trnK) gene, partial sequence; and maturase K (matK) gene, complete cds; chloroplast	EU681874	0	1564	2	100.0%	100.0%	32.7%		1445.2	chloroplast Fosterella penduliflora	Wed Jan 30 09:36:37 CET 2019	matK Extraction I	0	true	Bacterial	100.0%
		Fosterella penduliflora isolate 50b tRNA-Lys (trnK) gene, partial sequence; and maturase K (matK) gene, complete cds; chloroplast	EU681871	0	1564	2	100.0%	100.0%	32.7%		1445.2	chloroplast Fosterella penduliflora	Wed Jan 30 09:36:37 CET 2019	matK Extraction I	0	true	Bacterial	100.0%
		Fosterella penduliflora isolate 35a tRNA-Lys (trnK) gene, partial sequence; and maturase K (matK) gene, complete cds; chloroplast	EU681870	0	1564	2	100.0%	100.0%	32.7%		1445.2	chloroplast Fosterella penduliflora	Wed Jan 30 09:36:37 CET 2019	matK Extraction I	0	true	Bacterial	100.0%
		Fosterella penduliflora isolate 45c tRNA-Lys (trnK) gene, partial sequence; and maturase K (matK) gene, complete cds; chloroplast	EU681868	0	1564	2	100.0%	100.0%	32.7%		1445.2	chloroplast Fosterella penduliflora	Wed Jan 30 09:36:37 CET 2019	matK Extraction I	0	true	Bacterial	100.0%
		Fosterella penduliflora isolate 46d tRNA-Lys (trnK) gene, partial sequence; and maturase K (matK) gene, complete cds; chloroplast	EU681867	0	1564	2	100.0%	100.0%	32.7%		1445.2	chloroplast Fosterella penduliflora	Wed Jan 30 09:36:37 CET 2019	matK Extraction I	0	true	Bacterial	100.0%
		Fosterella penduliflora isolate H086 tRNA-Lys (trnK) gene, partial sequence; and maturase K (matK) gene, complete cds; chloroplast	AY949996	0	1564	2	100.0%	100.0%	32.7%		1445.2	chloroplast Fosterella penduliflora	Wed Jan 30 09:36:37 CET 2019	matK Extraction I	0	true	Bacterial	100.0%
		Fosterella albicans isolate H156 tRNA-Lys (trnK) gene, partial sequence; and maturase K (matK) gene, complete cds; chloroplast	AY949994	0	1564	2	100.0%	100.0%	32.7%		1445.2	chloroplast Fosterella albicans	Wed Jan 30 09:36:37 CET 2019	matK Extraction I	0	true	Bacterial	100.0%
		MegaBLAST results - only first 10 hits shown	GeneBank_ID	# Nucleotide Sequences With Mates	# Nucleotides	# Sequences	% Identical Sites	% Pairwise Identity	%GC	Accession	Bit-Score	Common Name	Created Date	Database	E Value	Free end gaps	Genetic Code	Grade
	FM210792 - Tillandsia fasciculata	Tillandsia tricolor voucher Granados-Mendoza 418 tRNA-Lys (trnK) gene, intron; and maturase K (matK) gene, complete cds; chloroplast	KY114858	0	1564	2	100.0%	100.0%	31.8%		1445.2	chloroplast Tillandsia tricolor	Wed Jan 30 09:53:21 CET 2019	matK Extraction I	0	true	Bacterial	100.0%
		Tillandsia streptophylla voucher Salazar-Chavez 8696 tRNA-Lys (trnK) gene, intron; and maturase K (matK) gene, complete cds; chloroplast	KY114852	0	1564	2	100.0%	100.0%	31.8%		1445.2	chloroplast Tillandsia streptophylla	Wed Jan 30 09:53:21 CET 2019	matK Extraction I	0	true	Bacterial	100.0%
		Tillandsia polystachia voucher Granados-Mendoza 357 tRNA-Lys (trnK) gene, intron; and maturase K (matK) gene, complete cds; chloroplast	KY114846	0	1564	2	100.0%	100.0%	31.8%		1445.2	chloroplast Tillandsia polystachia	Wed Jan 30 09:53:21 CET 2019	matK Extraction I	0	true	Bacterial	100.0%
		Tillandsia concolor voucher Flores Maria 1808 tRNA-Lys (trnK) gene, intron; and maturase K (matK) gene, complete cds; chloroplast	KY114820	0	1564	2	100.0%	100.0%	31.8%		1445.2	chloroplast Tillandsia concolor	Wed Jan 30 09:53:22 CET 2019	matK Extraction I	0	true	Bacterial	100.0%
		Tillandsia capitata voucher Granados-Mendoza 309 tRNA-Lys (trnK) gene, intron; and maturase K (matK) gene, complete cds; chloroplast	KY114819	0	1564	2	100.0%	100.0%	31.8%		1445.2	chloroplast Tillandsia capitata	Wed Jan 30 09:53:22 CET 2019	matK Extraction I	0	true	Bacterial	100.0%
		Tillandsia butzii voucher Granados-Mendoza 405 tRNA-Lys (trnK) gene, intron; and maturase K (matK) gene, complete cds; chloroplast	KY114816	0	1564	2	100.0%	100.0%	31.8%		1445.2	chloroplast Tillandsia butzii	Wed Jan 30 09:53:22 CET 2019	matK Extraction I	0	true	Bacterial	100.0%
		Tillandsia balbisiana voucher Torres 1390 tRNA-Lys (trnK) gene, intron; and maturase K (matK) gene, complete cds; chloroplast	KY114810	0	1564	2	100.0%	100.0%	31.8%		1445.2	chloroplast Tillandsia balbisiana	Wed Jan 30 09:53:22 CET 2019	matK Extraction I	0	true	Bacterial	100.0%
		Tillandsia setacea isolate B1246 trnK-UUU gene, partial sequence; and maturase K (matK) gene, complete cds; plastid	KX754214	0	1564	2	100.0%	100.0%	31.8%		1445.2	plastid Tillandsia setacea	Wed Jan 30 09:53:21 CET 2019	matK Extraction I	0	true	Bacterial	100.0%
		Tillandsia fasciculata isolate B717 trnK-UUU gene, partial sequence; and maturase K (matK) gene, complete cds; plastid	KX754189	0	1564	2	100.0%	100.0%	31.8%		1445.2	plastid Tillandsia fasciculata	Wed Jan 30 09:53:22 CET 2019	matK Extraction I	0	true	Bacterial	100.0%
		Tillandsia flabellata isolate JP069N maturase K (matK) gene, intron and partial cds; chloroplast	KU848416	0	1564	2	100.0%	100.0%	31.8%		1445.2	chloroplast Tillandsia flabellata	Wed Jan 30 09:53:22 CET 2019	matK Extraction I	0	true	Bacterial	100.0%
		Tillandsia bulbosa maturase K (matK) gene, partial cds; chloroplast	JN202271	0	1564	2	100.0%	100.0%	31.8%		1445.2	chloroplast Tillandsia bulbosa	Wed Jan 30 09:53:22 CET 2019	matK Extraction I	0	true	Bacterial	100.0%
		Tillandsia juncea chloroplast partial tRNA-Lys intron and matK gene for maturase K, specimen voucher MEXU:C. Granados 285	FM956443_Tillandsia juncea_12_Tillandsia_subg_Tillandsia	0	1564	2	100.0%	100.0%	31.8%		1445.2	chloroplast Tillandsia juncea	Wed Jan 30 09:53:21 CET 2019	matK Extraction I	0	true	Bacterial	100.0%
		Tillandsia schiedeana chloroplast partial tRNA-Lys intron and matK gene for maturase K, specimen voucher MEXU:C. Granados 317	FM956434	0	1564	2	100.0%	100.0%	31.8%		1445.2	chloroplast Tillandsia schiedeana	Wed Jan 30 09:53:21 CET 2019	matK Extraction I	0	true	Bacterial	100.0%
		Tillandsia fasciculata var. fasciculata MB-76 tRNA-Lys (trnK) gene, partial sequence; and maturase K (matK) gene, complete cds; chloroplast	AY614100	0	1564	2	100.0%	100.0%	31.8%		1445.2	chloroplast Tillandsia fasciculata var. fasciculata	Wed Jan 30 09:53:22 CET 2019	matK Extraction I	0	true	Bacterial	100.0%
		Tillandsia ionantha var. ionantha MB-84 tRNA-Lys (trnK) gene, partial sequence; and maturase K (matK) gene, complete cds; chloroplast	AY614099_Tillandsia ionantha_12_Tillandsia_subg_Tillandsia	0	1564	2	100.0%	100.0%	31.8%		1445.2	chloroplast Tillandsia ionantha var. ionantha	Wed Jan 30 09:53:21 CET 2019	matK Extraction I	0	true	Bacterial	100.0%
		Tillandsia juncea MB-73 tRNA-Lys (trnK) gene, partial sequence; and maturase K (matK) gene, complete cds; chloroplast	AY614097_Tillandsia juncea_12_Tillandsia_subg_Tillandsia	0	1564	2	100.0%	100.0%	31.8%		1445.2	chloroplast Tillandsia juncea	Wed Jan 30 09:53:21 CET 2019	matK Extraction I	0	true	Bacterial	100.0%
		Tillandsia klausii MB-85 tRNA-Lys (trnK) gene, partial sequence; and maturase K (matK) gene, complete cds; chloroplast	AY614096	0	1564	2	100.0%	100.0%	31.8%		1445.2	chloroplast Tillandsia klausii	Wed Jan 30 09:53:21 CET 2019	matK Extraction I	0	true	Bacterial	100.0%
		MegaBLAST results - only first 10 hits shown	GeneBank_ID	# Nucleotide Sequences With Mates	# Nucleotides	# Sequences	% Identical Sites	% Pairwise Identity	%GC	Accession	Bit-Score	Common Name	Created Date	Database	E Value	Free end gaps	Genetic Code	Grade
	HQ167779 - Fosterella robertreadii	Fosterella robertreadii isolate B019 tRNA-Lys (trnK) gene, intron; and maturase K (matK) gene, complete cds; chloroplast	HQ167780	0	1564	2	100.0%	100.0%	32.9%		1445.2	chloroplast Fosterella robertreadii	Wed Jan 30 09:37:25 CET 2019	matK Extraction I	0	true	Bacterial	100.0%
		Fosterella robertreadii isolate 137b tRNA-Lys (trnK) gene, partial sequence; and maturase K (matK) gene, complete cds; chloroplast	EU681922	0	1564	2	100.0%	100.0%	32.9%		1445.2	chloroplast Fosterella robertreadii	Wed Jan 30 09:37:25 CET 2019	matK Extraction I	0	true	Bacterial	100.0%
		Fosterella schidosperma isolate 86a tRNA-Lys (trnK) gene, partial sequence; and maturase K (matK) gene, complete cds; chloroplast	EU681912	0	1564	2	100.0%	100.0%	32.9%		1445.2	chloroplast Fosterella schidosperma	Wed Jan 30 09:37:25 CET 2019	matK Extraction I	0	true	Bacterial	100.0%
		Fosterella robertreadii isolate 135b tRNA-Lys (trnK) gene, partial sequence; and maturase K (matK) gene, complete cds; chloroplast	EU681847	0	1564	2	100.0%	100.0%	32.9%		1445.2	chloroplast Fosterella robertreadii	Wed Jan 30 09:37:25 CET 2019	matK Extraction I	0	true	Bacterial	100.0%
		Fosterella petiolata isolate B017 tRNA-Lys (trnK) gene, intron; and maturase K (matK) gene, complete cds; chloroplast	HQ167778	0	1564	2	99.7%	99.7%	33.1%		1434.12	chloroplast Fosterella petiolata	Wed Jan 30 09:37:25 CET 2019	matK Extraction I	0	true	Bacterial	99.9%
		Fosterella petiolata maturase K (matK) gene, complete cds; chloroplast	AF162242	0	1564	2	99.7%	99.7%	33.1%		1434.12	chloroplast Fosterella petiolata	Wed Jan 30 09:37:25 CET 2019	matK Extraction I	0	true	Bacterial	99.9%
		Fosterella windischii isolate B022 tRNA-Lys (trnK) gene, intron; and maturase K (matK) gene, complete cds; chloroplast	HQ167783	0	1564	2	99.6%	99.7%	32.9%		1432.27	chloroplast Fosterella windischii	Wed Jan 30 09:37:25 CET 2019	matK Extraction I	0	true	Bacterial	99.9%
		Fosterella albicans isolate R262 maturase K (matK) gene, partial cds; chloroplast	FJ968217	0	1560	2	99.7%	99.7%	33.1%		1430.43	chloroplast Fosterella albicans	Wed Jan 30 09:37:25 CET 2019	matK Extraction I	0	true	Bacterial	99.7%
		Fosterella albicans isolate B032 tRNA-Lys (trnK) gene, intron; and maturase K (matK) gene, complete cds; chloroplast	HQ167789	0	1564	2	99.6%	99.6%	33.0%		1428.58	chloroplast Fosterella albicans	Wed Jan 30 09:37:26 CET 2019	matK Extraction I	0	true	Bacterial	99.8%
		Fosterella albicans isolate B031 tRNA-Lys (trnK) gene, intron; and maturase K (matK) gene, complete cds; chloroplast	HQ167788	0	1564	2	99.6%	99.6%	33.0%		1428.58	chloroplast Fosterella albicans	Wed Jan 30 09:37:26 CET 2019	matK Extraction I	0	true	Bacterial	99.8%
		MegaBLAST results - only first 10 hits shown	GeneBank_ID	# Nucleotide Sequences With Mates	# Nucleotides	# Sequences	% Identical Sites	% Pairwise Identity	%GC	Accession	Bit-Score	Common Name	Created Date	Database	E Value	Free end gaps	Genetic Code	Grade
	JN202228_Aechmea phanerophlebia	Quesnelia kautskyi maturase K (matK) gene, partial cds; chloroplast	JN202270_Quesnelia kautskyi_18_Billbergia_Quesnelia_subgen_Billbergiopsis_Aechmea_subgen_Aechmea_group	0	1564	2	100.0%	100.0%	33.0%		1445.2	chloroplast Quesnelia kautskyi	Wed Jan 30 09:13:25 CET 2019	matK Extraction I	0	true	Bacterial	100.0%
		Quesnelia kautskyi maturase K (matK) gene, partial cds; chloroplast	JN202269_Quesnelia kautskyi_18_Billbergia_Quesnelia_subgen_Billbergiopsis_Aechmea_subgen_Aechmea_group	0	1564	2	100.0%	100.0%	33.0%		1445.2	chloroplast Quesnelia kautskyi	Wed Jan 30 09:13:25 CET 2019	matK Extraction I	0	true	Bacterial	100.0%
		Billbergia euphemiae maturase K (matK) gene, partial cds; chloroplast	JN202237_Billbergia euphemiae_18_Billbergia_Quesnelia_subgen_Billbergiopsis_Aechmea_subgen_Aechmea_group	0	1564	2	100.0%	100.0%	33.0%		1445.2	chloroplast Billbergia euphemiae	Wed Jan 30 09:13:25 CET 2019	matK Extraction I	0	true	Bacterial	100.0%
		Aechmea phanerophlebia maturase K (matK) gene, partial cds; chloroplast	JN202229_Aechmea phanerophlebia_22_Quesnelia_subgen_Quesneliana_Aechmea_group	0	1564	2	100.0%	100.0%	33.0%		1445.2	chloroplast Aechmea phanerophlebia	Wed Jan 30 09:13:25 CET 2019	matK Extraction I	0	true	Bacterial	100.0%
		Aechmea phanerophlebia maturase K (matK) gene, partial cds; chloroplast	JN202227_Aechmea phanerophlebia_22_Quesnelia_subgen_Quesneliana_Aechmea_group	0	1564	2	100.0%	100.0%	33.0%		1445.2	chloroplast Aechmea phanerophlebia	Wed Jan 30 09:13:25 CET 2019	matK Extraction I	0	true	Bacterial	100.0%
		Aechmea distichantha maturase K (matK) gene, partial cds; chloroplast	JN202221	0	1564	2	100.0%	100.0%	33.0%		1445.2	chloroplast Aechmea distichantha	Wed Jan 30 09:13:25 CET 2019	matK Extraction I	0	true	Bacterial	100.0%
		Quesnelia liboniana isolate H220 tRNA-Lys (trnK) gene, partial sequence; and maturase K (matK) gene, complete cds; chloroplast	AY950048_Quesnelia liboniana_18_Billbergia_Quesnelia_subgen_Billbergiopsis_Aechmea_subgen_Aechmea_group	0	1564	2	100.0%	100.0%	33.0%		1445.2	chloroplast Quesnelia liboniana	Wed Jan 30 09:13:25 CET 2019	matK Extraction I	0	true	Bacterial	100.0%
		Edmundoa ambigua voucher MSBG 1987-0264A (Living specimen) trnK gene, partial sequence; and maturase K (matK) gene, complete cds; chloroplast	KU762889_Edmundoa ambigua_23_Nidularioid_group	0	1564	2	99.9%	99.9%	33.1%		1439.66	chloroplast Edmundoa ambigua	Wed Jan 30 09:13:26 CET 2019	matK Extraction I	0	true	Bacterial	99.9%
		Aechmea lueddemanniana voucher MSBG 1997-0147A (Living specimen) trnK gene, partial sequence; and maturase K (matK) gene, complete cds; chloroplast	KU762879_Aechmea lueddemanniana _24_Central_American_group	0	1564	2	99.9%	99.9%	33.1%		1439.66	chloroplast Aechmea lueddemanniana	Wed Jan 30 09:13:27 CET 2019	matK Extraction I	0	true	Bacterial	99.9%
		Ananas nanus voucher MSBG 1197-1 foster (Living specimen) trnK gene, partial sequence; and maturase K (matK) gene, complete cds; chloroplast	KU762815	0	1564	2	99.9%	99.9%	33.1%		1439.66	chloroplast Ananas comosus var. microstachys	Wed Jan 30 09:13:26 CET 2019	matK Extraction I	0	true	Bacterial	99.9%
		MegaBLAST results - only first 10 hits shown	GeneBank_ID	# Nucleotide Sequences With Mates	# Nucleotides	# Sequences	% Identical Sites	% Pairwise Identity	%GC	Accession	Bit-Score	Common Name	Created Date	Database	E Value	Free end gaps	Genetic Code	Grade
	JN202244_Canistrum aurantiacum	Ronnbergia silvana voucher Leme 5131 (HB) trnK gene, partial sequence; and maturase K (matK) gene, complete cds; chloroplast	KU762792	0	1564	2	100.0%	100.0%	33.0%		1445.2	chloroplast Ronnbergia silvana	Wed Jan 30 09:31:26 CET 2019	matK Extraction I	0	true	Bacterial	100.0%
		Aechmea leptantha isolate H239 maturase K (matK) gene, partial cds; chloroplast	JX649236_Aechmea leptantha_2_Gravisia_clade	0	1564	2	100.0%	100.0%	33.0%		1445.2	chloroplast Aechmea leptantha	Wed Jan 30 09:31:26 CET 2019	matK Extraction I	0	true	Bacterial	100.0%
		Aechmea lueddemanniana voucher MSBG 1997-0147A (Living specimen) trnK gene, partial sequence; and maturase K (matK) gene, complete cds; chloroplast	KU762879_Aechmea lueddemanniana _24_Central_American_group	0	1564	2	99.9%	99.9%	33.1%		1439.66	chloroplast Aechmea lueddemanniana	Wed Jan 30 09:31:27 CET 2019	matK Extraction I	0	true	Bacterial	99.9%
		Ananas nanus voucher MSBG 1197-1 foster (Living specimen) trnK gene, partial sequence; and maturase K (matK) gene, complete cds; chloroplast	KU762815	0	1564	2	99.9%	99.9%	33.1%		1439.66	chloroplast Ananas comosus var. microstachys	Wed Jan 30 09:31:26 CET 2019	matK Extraction I	0	true	Bacterial	99.9%
		Ananas comosus voucher Holst 6244 (SEL) trnK gene, partial sequence; and maturase K (matK) gene, complete cds; chloroplast	KU762814	0	1564	2	99.9%	99.9%	33.1%		1439.66	pineapple	Wed Jan 30 09:31:27 CET 2019	matK Extraction I	0	true	Bacterial	99.9%
		Lymania corallina voucher MSBG 1996-0662A (Living specimen) trnK gene, partial sequence; and maturase K (matK) gene, complete cds; chloroplast	KU762801	0	1564	2	99.9%	99.9%	33.1%		1439.66	chloroplast Lymania corallina	Wed Jan 30 09:31:26 CET 2019	matK Extraction I	0	true	Bacterial	99.9%
		Ananas ananassoides maturase K (matK) gene, complete cds; chloroplast	KU659085	0	1564	2	99.9%	99.9%	33.1%		1439.66	chloroplast Ananas comosus var. microstachys	Wed Jan 30 09:31:26 CET 2019	matK Extraction I	0	true	Bacterial	99.9%
		Ananas ananassoides maturase K (matK) gene, complete cds; chloroplast	KU659084	0	1564	2	99.9%	99.9%	33.1%		1439.66	chloroplast Ananas comosus var. microstachys	Wed Jan 30 09:31:26 CET 2019	matK Extraction I	0	true	Bacterial	99.9%
		Ananas comosus var. parguazensis maturase K (matK) gene, partial cds; chloroplast	KU258042	0	1564	2	99.9%	99.9%	33.1%		1439.66	chloroplast Ananas comosus var. parguazensis	Wed Jan 30 09:31:26 CET 2019	matK Extraction I	0	true	Bacterial	99.9%
		Ananas nanus maturase K (matK) gene, complete cds; chloroplast	KU258041	0	1564	2	99.9%	99.9%	33.1%		1439.66	chloroplast Ananas comosus var. microstachys	Wed Jan 30 09:31:26 CET 2019	matK Extraction I	0	true	Bacterial	99.9%
		MegaBLAST results - only first 10 hits shown	GeneBank_ID	# Nucleotide Sequences With Mates	# Nucleotides	# Sequences	% Identical Sites	% Pairwise Identity	%GC	Accession	Bit-Score	Common Name	Created Date	Database	E Value	Free end gaps	Genetic Code	Grade
	JN202259_Nidularium innocentii	Edmundoa ambigua voucher MSBG 1987-0264A (Living specimen) trnK gene, partial sequence; and maturase K (matK) gene, complete cds; chloroplast	KU762889_Edmundoa ambigua_23_Nidularioid_group	0	1564	2	100.0%	100.0%	33.1%		1445.2	chloroplast Edmundoa ambigua	Wed Jan 30 09:42:02 CET 2019	matK Extraction I	0	true	Bacterial	100.0%
		Edmundoa perplexa isolate BB125 maturase K (matK) gene, partial cds; chloroplast	JX649258_Edmundoa perplexa_23_Nidularioid_group	0	1564	2	100.0%	100.0%	33.1%		1445.2	chloroplast Edmundoa perplexa	Wed Jan 30 09:42:02 CET 2019	matK Extraction I	0	true	Bacterial	100.0%
		Edmundoa ambigua isolate BB124 maturase K (matK) gene, partial cds; chloroplast	JX649257_Edmundoa ambigua_23_Nidularioid_group	0	1564	2	100.0%	100.0%	33.1%		1445.2	chloroplast Edmundoa ambigua	Wed Jan 30 09:42:02 CET 2019	matK Extraction I	0	true	Bacterial	100.0%
		Nidularium innocentii maturase K (matK) gene, partial cds; chloroplast	JN202260_Nidularium innocentii_23_Nidularioid_group	0	1564	2	100.0%	100.0%	33.1%		1445.2	chloroplast Nidularium innocentii	Wed Jan 30 09:42:02 CET 2019	matK Extraction I	0	true	Bacterial	100.0%
		Edmundoa lindenii var. rosaea isolate F49a tRNA-Lys (trnK) gene, partial sequence; and maturase K (matK) gene, complete cds; chloroplast	EU681903_Edmundoa lindenii_23_Nidularioid_group	0	1564	2	100.0%	100.0%	33.1%		1445.2	chloroplast Edmundoa lindenii var. rosea	Wed Jan 30 09:42:02 CET 2019	matK Extraction I	0	true	Bacterial	100.0%
		Edmundoa perplexa maturase K (matK) gene, complete cds; chloroplast	AF539967_Edmundoa perplexa_23_Nidularioid_group	0	1564	2	100.0%	100.0%	33.1%		1445.2	chloroplast Edmundoa perplexa	Wed Jan 30 09:42:02 CET 2019	matK Extraction I	0	true	Bacterial	100.0%
		Quesnelia kautskyi maturase K (matK) gene, partial cds; chloroplast	JN202270_Quesnelia kautskyi_18_Billbergia_Quesnelia_subgen_Billbergiopsis_Aechmea_subgen_Aechmea_group	0	1564	2	99.9%	99.9%	33.0%		1439.66	chloroplast Quesnelia kautskyi	Wed Jan 30 09:42:02 CET 2019	matK Extraction I	0	true	Bacterial	99.9%
		Quesnelia kautskyi maturase K (matK) gene, partial cds; chloroplast	JN202269_Quesnelia kautskyi_18_Billbergia_Quesnelia_subgen_Billbergiopsis_Aechmea_subgen_Aechmea_group	0	1564	2	99.9%	99.9%	33.0%		1439.66	chloroplast Quesnelia kautskyi	Wed Jan 30 09:42:02 CET 2019	matK Extraction I	0	true	Bacterial	99.9%
		Billbergia euphemiae maturase K (matK) gene, partial cds; chloroplast	JN202237_Billbergia euphemiae_18_Billbergia_Quesnelia_subgen_Billbergiopsis_Aechmea_subgen_Aechmea_group	0	1564	2	99.9%	99.9%	33.0%		1439.66	chloroplast Billbergia euphemiae	Wed Jan 30 09:42:02 CET 2019	matK Extraction I	0	true	Bacterial	99.9%
		Aechmea phanerophlebia maturase K (matK) gene, partial cds; chloroplast	JN202229_Aechmea phanerophlebia_22_Quesnelia_subgen_Quesneliana_Aechmea_group	0	1564	2	99.9%	99.9%	33.0%		1439.66	chloroplast Aechmea phanerophlebia	Wed Jan 30 09:42:02 CET 2019	matK Extraction I	0	true	Bacterial	99.9%
		MegaBLAST results - only first 10 hits shown	GeneBank_ID	# Nucleotide Sequences With Mates	# Nucleotides	# Sequences	% Identical Sites	% Pairwise Identity	%GC	Accession	Bit-Score	Common Name	Created Date	Database	E Value	Free end gaps	Genetic Code	Grade
	JN202272 - Tillandsia bulbosa	Tillandsia tricolor voucher Granados-Mendoza 418 tRNA-Lys (trnK) gene, intron; and maturase K (matK) gene, complete cds; chloroplast	KY114858	0	1564	2	100.0%	100.0%	31.8%		1445.2	chloroplast Tillandsia tricolor	Wed Jan 30 09:51:37 CET 2019	matK Extraction I	0	true	Bacterial	100.0%
		Tillandsia streptophylla voucher Salazar-Chavez 8696 tRNA-Lys (trnK) gene, intron; and maturase K (matK) gene, complete cds; chloroplast	KY114852	0	1564	2	100.0%	100.0%	31.8%		1445.2	chloroplast Tillandsia streptophylla	Wed Jan 30 09:51:37 CET 2019	matK Extraction I	0	true	Bacterial	100.0%
		Tillandsia polystachia voucher Granados-Mendoza 357 tRNA-Lys (trnK) gene, intron; and maturase K (matK) gene, complete cds; chloroplast	KY114846	0	1564	2	100.0%	100.0%	31.8%		1445.2	chloroplast Tillandsia polystachia	Wed Jan 30 09:51:37 CET 2019	matK Extraction I	0	true	Bacterial	100.0%
		Tillandsia concolor voucher Flores Maria 1808 tRNA-Lys (trnK) gene, intron; and maturase K (matK) gene, complete cds; chloroplast	KY114820	0	1564	2	100.0%	100.0%	31.8%		1445.2	chloroplast Tillandsia concolor	Wed Jan 30 09:51:37 CET 2019	matK Extraction I	0	true	Bacterial	100.0%
		Tillandsia capitata voucher Granados-Mendoza 309 tRNA-Lys (trnK) gene, intron; and maturase K (matK) gene, complete cds; chloroplast	KY114819	0	1564	2	100.0%	100.0%	31.8%		1445.2	chloroplast Tillandsia capitata	Wed Jan 30 09:51:38 CET 2019	matK Extraction I	0	true	Bacterial	100.0%
		Tillandsia butzii voucher Granados-Mendoza 405 tRNA-Lys (trnK) gene, intron; and maturase K (matK) gene, complete cds; chloroplast	KY114816	0	1564	2	100.0%	100.0%	31.8%		1445.2	chloroplast Tillandsia butzii	Wed Jan 30 09:51:38 CET 2019	matK Extraction I	0	true	Bacterial	100.0%
		Tillandsia balbisiana voucher Torres 1390 tRNA-Lys (trnK) gene, intron; and maturase K (matK) gene, complete cds; chloroplast	KY114810	0	1564	2	100.0%	100.0%	31.8%		1445.2	chloroplast Tillandsia balbisiana	Wed Jan 30 09:51:38 CET 2019	matK Extraction I	0	true	Bacterial	100.0%
		Tillandsia setacea isolate B1246 trnK-UUU gene, partial sequence; and maturase K (matK) gene, complete cds; plastid	KX754214	0	1564	2	100.0%	100.0%	31.8%		1445.2	plastid Tillandsia setacea	Wed Jan 30 09:51:37 CET 2019	matK Extraction I	0	true	Bacterial	100.0%
		Tillandsia fasciculata isolate B717 trnK-UUU gene, partial sequence; and maturase K (matK) gene, complete cds; plastid	KX754189	0	1564	2	100.0%	100.0%	31.8%		1445.2	plastid Tillandsia fasciculata	Wed Jan 30 09:51:37 CET 2019	matK Extraction I	0	true	Bacterial	100.0%
		Tillandsia flabellata isolate JP069N maturase K (matK) gene, intron and partial cds; chloroplast	KU848416	0	1564	2	100.0%	100.0%	31.8%		1445.2	chloroplast Tillandsia flabellata	Wed Jan 30 09:51:37 CET 2019	matK Extraction I	0	true	Bacterial	100.0%
		Tillandsia bulbosa maturase K (matK) gene, partial cds; chloroplast	JN202271	0	1564	2	100.0%	100.0%	31.8%		1445.2	chloroplast Tillandsia bulbosa	Wed Jan 30 09:51:38 CET 2019	matK Extraction I	0	true	Bacterial	100.0%
		Tillandsia juncea chloroplast partial tRNA-Lys intron and matK gene for maturase K, specimen voucher MEXU:C. Granados 285	FM956443_Tillandsia juncea_12_Tillandsia_subg_Tillandsia	0	1564	2	100.0%	100.0%	31.8%		1445.2	chloroplast Tillandsia juncea	Wed Jan 30 09:51:37 CET 2019	matK Extraction I	0	true	Bacterial	100.0%
		Tillandsia schiedeana chloroplast partial tRNA-Lys intron and matK gene for maturase K, specimen voucher MEXU:C. Granados 317	FM956434	0	1564	2	100.0%	100.0%	31.8%		1445.2	chloroplast Tillandsia schiedeana	Wed Jan 30 09:51:37 CET 2019	matK Extraction I	0	true	Bacterial	100.0%
		Tillandsia fasciculata var. fasciculata MB-76 tRNA-Lys (trnK) gene, partial sequence; and maturase K (matK) gene, complete cds; chloroplast	AY614100	0	1564	2	100.0%	100.0%	31.8%		1445.2	chloroplast Tillandsia fasciculata var. fasciculata	Wed Jan 30 09:51:37 CET 2019	matK Extraction I	0	true	Bacterial	100.0%
		Tillandsia ionantha var. ionantha MB-84 tRNA-Lys (trnK) gene, partial sequence; and maturase K (matK) gene, complete cds; chloroplast	AY614099_Tillandsia ionantha_12_Tillandsia_subg_Tillandsia	0	1564	2	100.0%	100.0%	31.8%		1445.2	chloroplast Tillandsia ionantha var. ionantha	Wed Jan 30 09:51:37 CET 2019	matK Extraction I	0	true	Bacterial	100.0%
		Tillandsia juncea MB-73 tRNA-Lys (trnK) gene, partial sequence; and maturase K (matK) gene, complete cds; chloroplast	AY614097_Tillandsia juncea_12_Tillandsia_subg_Tillandsia	0	1564	2	100.0%	100.0%	31.8%		1445.2	chloroplast Tillandsia juncea	Wed Jan 30 09:51:37 CET 2019	matK Extraction I	0	true	Bacterial	100.0%
		Tillandsia klausii MB-85 tRNA-Lys (trnK) gene, partial sequence; and maturase K (matK) gene, complete cds; chloroplast	AY614096	0	1564	2	100.0%	100.0%	31.8%		1445.2	chloroplast Tillandsia klausii	Wed Jan 30 09:51:37 CET 2019	matK Extraction I	0	true	Bacterial	100.0%
		Tillandsia bulbosa voucher Salazar-Chavez 8632 tRNA-Lys (trnK) gene, intron; and maturase K (matK) gene, complete cds; chloroplast	KY114815	0	1564	2	99.9%	99.9%	32.0%		1439.66	chloroplast Tillandsia bulbosa	Wed Jan 30 09:51:38 CET 2019	matK Extraction I	0	true	Bacterial	99.9%
		MegaBLAST results - only first 10 hits shown	GeneBank_ID	# Nucleotide Sequences With Mates	# Nucleotides	# Sequences	% Identical Sites	% Pairwise Identity	%GC	Accession	Bit-Score	Common Name	Created Date	Database	E Value	Free end gaps	Genetic Code	Grade
	JN202275 - Tillandsia polystachia	Tillandsia polystachia maturase K (matK) gene, partial cds; chloroplast	JN202274	0	1564	2	100.0%	100.0%	31.7%		1445.2	chloroplast Tillandsia polystachia	Wed Jan 30 10:42:34 CET 2019	matK Extraction I	0	true	Bacterial	100.0%
		Tillandsia tricolor voucher Granados-Mendoza 418 tRNA-Lys (trnK) gene, intron; and maturase K (matK) gene, complete cds; chloroplast	KY114858	0	1564	2	99.9%	99.9%	31.8%		1439.66	chloroplast Tillandsia tricolor	Wed Jan 30 10:42:34 CET 2019	matK Extraction I	0	true	Bacterial	99.9%
		Tillandsia streptophylla voucher Salazar-Chavez 8696 tRNA-Lys (trnK) gene, intron; and maturase K (matK) gene, complete cds; chloroplast	KY114852	0	1564	2	99.9%	99.9%	31.8%		1439.66	chloroplast Tillandsia streptophylla	Wed Jan 30 10:42:34 CET 2019	matK Extraction I	0	true	Bacterial	99.9%
		Tillandsia polystachia voucher Granados-Mendoza 357 tRNA-Lys (trnK) gene, intron; and maturase K (matK) gene, complete cds; chloroplast	KY114846	0	1564	2	99.9%	99.9%	31.8%		1439.66	chloroplast Tillandsia polystachia	Wed Jan 30 10:42:34 CET 2019	matK Extraction I	0	true	Bacterial	99.9%
		Tillandsia magnusiana voucher Granados-Mendoza 332 tRNA-Lys (trnK) gene, intron; and maturase K (matK) gene, complete cds; chloroplast	KY114840	0	1564	2	99.9%	99.9%	31.8%		1439.66	chloroplast Tillandsia magnusiana	Wed Jan 30 10:42:34 CET 2019	matK Extraction I	0	true	Bacterial	99.9%
		Tillandsia concolor voucher Flores Maria 1808 tRNA-Lys (trnK) gene, intron; and maturase K (matK) gene, complete cds; chloroplast	KY114820	0	1564	2	99.9%	99.9%	31.8%		1439.66	chloroplast Tillandsia concolor	Wed Jan 30 10:42:34 CET 2019	matK Extraction I	0	true	Bacterial	99.9%
		Tillandsia capitata voucher Granados-Mendoza 309 tRNA-Lys (trnK) gene, intron; and maturase K (matK) gene, complete cds; chloroplast	KY114819	0	1564	2	99.9%	99.9%	31.8%		1439.66	chloroplast Tillandsia capitata	Wed Jan 30 10:42:34 CET 2019	matK Extraction I	0	true	Bacterial	99.9%
		Tillandsia butzii voucher Granados-Mendoza 405 tRNA-Lys (trnK) gene, intron; and maturase K (matK) gene, complete cds; chloroplast	KY114816	0	1564	2	99.9%	99.9%	31.8%		1439.66	chloroplast Tillandsia butzii	Wed Jan 30 10:42:34 CET 2019	matK Extraction I	0	true	Bacterial	99.9%
		Tillandsia balbisiana voucher Torres 1390 tRNA-Lys (trnK) gene, intron; and maturase K (matK) gene, complete cds; chloroplast	KY114810	0	1564	2	99.9%	99.9%	31.8%		1439.66	chloroplast Tillandsia balbisiana	Wed Jan 30 10:42:34 CET 2019	matK Extraction I	0	true	Bacterial	99.9%
		Tillandsia setacea isolate B1246 trnK-UUU gene, partial sequence; and maturase K (matK) gene, complete cds; plastid	KX754214	0	1564	2	99.9%	99.9%	31.8%		1439.66	plastid Tillandsia setacea	Wed Jan 30 10:42:34 CET 2019	matK Extraction I	0	true	Bacterial	99.9%
		MegaBLAST results - only first 10 hits shown	GeneBank_ID	# Nucleotide Sequences With Mates	# Nucleotides	# Sequences	% Identical Sites	% Pairwise Identity	%GC	Accession	Bit-Score	Common Name	Created Date	Database	E Value	Free end gaps	Genetic Code	Grade
	JN202276_Tillandsia tenuifolia	Tillandsia aeranthos MB-111 tRNA-Lys (trnK) gene, partial sequence; and maturase K (matK) gene, complete cds; chloroplast	AY614131	0	1564	2	99.9%	99.9%	32.4%		1439.66	chloroplast Tillandsia aeranthos	Wed Jan 30 10:43:24 CET 2019	matK Extraction I	0	true	Bacterial	99.9%
		Tillandsia ixioides MB-43 tRNA-Lys (trnK) gene, partial sequence; and maturase K (matK) gene, complete cds; chloroplast	AY614129_Tillandsia ixioides_2_Tillandsia_subg_Anoplophytum	0	1564	2	99.9%	99.9%	32.4%		1439.66	chloroplast Tillandsia ixioides	Wed Jan 30 10:43:24 CET 2019	matK Extraction I	0	true	Bacterial	99.9%
		Tillandsia tenuifolia var. tenuifolia MB-26 tRNA-Lys (trnK) gene, partial sequence; and maturase K (matK) gene, complete cds; chloroplast	AY614132_Tillandsia tenuifolia_2_Tillandsia_subg_Anoplophytum	0	1564	2	99.7%	99.7%	32.5%		1434.12	chloroplast Tillandsia tenuifolia var. tenuifolia	Wed Jan 30 10:43:24 CET 2019	matK Extraction I	0	true	Bacterial	99.9%
		Tillandsia albertiana isolate B212 trnK-UUU gene, partial sequence; and maturase K (matK) gene, complete cds; plastid	KX754127	0	1564	2	99.6%	99.6%	32.4%		1428.58	plastid Tillandsia albertiana	Wed Jan 30 10:43:24 CET 2019	matK Extraction I	0	true	Bacterial	99.8%
		Tillandsia tenuifolia maturase K (matK) gene, partial cds; chloroplast	JN202277_Tillandsia tenuifolia_2_Tillandsia_subg_Anoplophytum	0	1564	2	99.6%	99.6%	32.1%		1428.58	chloroplast Tillandsia tenuifolia	Wed Jan 30 10:43:24 CET 2019	matK Extraction I	0	true	Bacterial	99.8%
		Tillandsia esseriana MB-69 tRNA-Lys (trnK) gene, partial sequence; and maturase K (matK) gene, complete cds; chloroplast	AY614120	0	1564	2	99.6%	99.6%	32.4%		1428.58	chloroplast Tillandsia esseriana	Wed Jan 30 10:43:24 CET 2019	matK Extraction I	0	true	Bacterial	99.8%
		Tillandsia albertiana MB-33 tRNA-Lys (trnK) gene, partial sequence; and maturase K (matK) gene, complete cds; chloroplast	AY614117	0	1564	2	99.6%	99.6%	32.4%		1428.58	chloroplast Tillandsia albertiana	Wed Jan 30 10:43:24 CET 2019	matK Extraction I	0	true	Bacterial	99.8%
		Tillandsia capillaris isolate B1592 trnK-UUU gene, partial sequence; and maturase K (matK) gene, complete cds; plastid	KX754232_Tillandsia capillaris_1_Tillandsia_subg_Diaphoranthema	0	1564	2	99.5%	99.5%	32.2%		1423.04	plastid Tillandsia capillaris	Wed Jan 30 10:43:25 CET 2019	matK Extraction I	0	true	Bacterial	99.7%
		Tillandsia capillaris isolate B916 trnK-UUU gene, partial sequence; and maturase K (matK) gene, complete cds; plastid	KX754206_Tillandsia capillaris_1_Tillandsia_subg_Diaphoranthema	0	1564	2	99.5%	99.5%	32.2%		1423.04	plastid Tillandsia capillaris	Wed Jan 30 10:43:25 CET 2019	matK Extraction I	0	true	Bacterial	99.7%
		Tillandsia recurvata isolate B529 trnK-UUU gene, partial sequence; and maturase K (matK) gene, complete cds; plastid	KX754174_Tillandsia recurvata_1_Tillandsia_subg_Diaphoranthema	0	1564	2	99.5%	99.5%	32.5%		1423.04	Renealmia recurvata L.	Wed Jan 30 10:43:24 CET 2019	matK Extraction I	0	true	Bacterial	99.7%
		MegaBLAST results - only first 10 hits shown	GeneBank_ID	# Nucleotide Sequences With Mates	# Nucleotides	# Sequences	% Identical Sites	% Pairwise Identity	%GC	Accession	Bit-Score	Common Name	Created Date	Database	E Value	Free end gaps	Genetic Code	Grade
	JX649240 - Aechmea turbinocalyx	Aechmea distichantha maturase K (matK) gene, complete cds; chloroplast	KU258023	0	1564	2	100.0%	100.0%	32.9%		1445.2	chloroplast Aechmea distichantha	Wed Jan 30 09:14:37 CET 2019	matK Extraction I	0	true	Bacterial	100.0%
		Aechmea distichantha maturase K (matK) gene, partial cds; chloroplast	JN202220	0	1564	2	100.0%	100.0%	32.9%		1445.2	chloroplast Aechmea distichantha	Wed Jan 30 09:14:37 CET 2019	matK Extraction I	0	true	Bacterial	100.0%
		Aechmea nudicaulis voucher Aguirre-Santoro 719 (SEL) trnK gene, partial sequence; and maturase K (matK) gene, complete cds; chloroplast	KU762861_Aechmea nudicaulis_19_Aechmea_subgen_Ortgiesia_Quesnelia_A_nudicaulis_group	0	1564	2	99.9%	99.9%	32.7%		1439.66	chloroplast Aechmea nudicaulis	Wed Jan 30 09:14:37 CET 2019	matK Extraction I	0	true	Bacterial	99.9%
		Quesnelia kautskyi maturase K (matK) gene, partial cds; chloroplast	JN202270_Quesnelia kautskyi_18_Billbergia_Quesnelia_subgen_Billbergiopsis_Aechmea_subgen_Aechmea_group	0	1564	2	99.9%	99.9%	33.0%		1439.66	chloroplast Quesnelia kautskyi	Wed Jan 30 09:14:37 CET 2019	matK Extraction I	0	true	Bacterial	99.9%
		Quesnelia kautskyi maturase K (matK) gene, partial cds; chloroplast	JN202269_Quesnelia kautskyi_18_Billbergia_Quesnelia_subgen_Billbergiopsis_Aechmea_subgen_Aechmea_group	0	1564	2	99.9%	99.9%	33.0%		1439.66	chloroplast Quesnelia kautskyi	Wed Jan 30 09:14:37 CET 2019	matK Extraction I	0	true	Bacterial	99.9%
		Billbergia euphemiae maturase K (matK) gene, partial cds; chloroplast	JN202237_Billbergia euphemiae_18_Billbergia_Quesnelia_subgen_Billbergiopsis_Aechmea_subgen_Aechmea_group	0	1564	2	99.9%	99.9%	33.0%		1439.66	chloroplast Billbergia euphemiae	Wed Jan 30 09:14:37 CET 2019	matK Extraction I	0	true	Bacterial	99.9%
		Aechmea phanerophlebia maturase K (matK) gene, partial cds; chloroplast	JN202229_Aechmea phanerophlebia_22_Quesnelia_subgen_Quesneliana_Aechmea_group	0	1564	2	99.9%	99.9%	33.0%		1439.66	chloroplast Aechmea phanerophlebia	Wed Jan 30 09:14:37 CET 2019	matK Extraction I	0	true	Bacterial	99.9%
		Aechmea phanerophlebia maturase K (matK) gene, partial cds; chloroplast	JN202227_Aechmea phanerophlebia_22_Quesnelia_subgen_Quesneliana_Aechmea_group	0	1564	2	99.9%	99.9%	33.0%		1439.66	chloroplast Aechmea phanerophlebia	Wed Jan 30 09:14:37 CET 2019	matK Extraction I	0	true	Bacterial	99.9%
		Aechmea distichantha maturase K (matK) gene, partial cds; chloroplast	JN202221	0	1564	2	99.9%	99.9%	33.0%		1439.66	chloroplast Aechmea distichantha	Wed Jan 30 09:14:37 CET 2019	matK Extraction I	0	true	Bacterial	99.9%
		Quesnelia liboniana isolate H220 tRNA-Lys (trnK) gene, partial sequence; and maturase K (matK) gene, complete cds; chloroplast	AY950048_Quesnelia liboniana_18_Billbergia_Quesnelia_subgen_Billbergiopsis_Aechmea_subgen_Aechmea_group	0	1564	2	99.9%	99.9%	33.0%		1439.66	chloroplast Quesnelia liboniana	Wed Jan 30 09:14:37 CET 2019	matK Extraction I	0	true	Bacterial	99.9%
		MegaBLAST results - only first 10 hits shown	GeneBank_ID	# Nucleotide Sequences With Mates	# Nucleotides	# Sequences	% Identical Sites	% Pairwise Identity	%GC	Accession	Bit-Score	Common Name	Created Date	Database	E Value	Free end gaps	Genetic Code	Grade
	JX649250 - Canistrum camacaense	Aechmea lueddemanniana voucher MSBG 1997-0147A (Living specimen) trnK gene, partial sequence; and maturase K (matK) gene, complete cds; chloroplast	KU762879_Aechmea lueddemanniana _24_Central_American_group	0	1564	2	99.9%	99.9%	33.1%		1441.51	chloroplast Aechmea lueddemanniana	Wed Jan 30 09:32:02 CET 2019	matK Extraction I	0	true	Bacterial	100.0%
		Ananas nanus voucher MSBG 1197-1 foster (Living specimen) trnK gene, partial sequence; and maturase K (matK) gene, complete cds; chloroplast	KU762815	0	1564	2	99.9%	99.9%	33.1%		1441.51	chloroplast Ananas comosus var. microstachys	Wed Jan 30 09:32:01 CET 2019	matK Extraction I	0	true	Bacterial	100.0%
		Ananas comosus voucher Holst 6244 (SEL) trnK gene, partial sequence; and maturase K (matK) gene, complete cds; chloroplast	KU762814	0	1564	2	99.9%	99.9%	33.1%		1441.51	pineapple	Wed Jan 30 09:32:01 CET 2019	matK Extraction I	0	true	Bacterial	100.0%
		Lymania corallina voucher MSBG 1996-0662A (Living specimen) trnK gene, partial sequence; and maturase K (matK) gene, complete cds; chloroplast	KU762801	0	1564	2	99.9%	99.9%	33.1%		1441.51	chloroplast Lymania corallina	Wed Jan 30 09:32:01 CET 2019	matK Extraction I	0	true	Bacterial	100.0%
		Ananas ananassoides maturase K (matK) gene, complete cds; chloroplast	KU659085	0	1564	2	99.9%	99.9%	33.1%		1441.51	chloroplast Ananas comosus var. microstachys	Wed Jan 30 09:32:01 CET 2019	matK Extraction I	0	true	Bacterial	100.0%
		Ananas ananassoides maturase K (matK) gene, complete cds; chloroplast	KU659084	0	1564	2	99.9%	99.9%	33.1%		1441.51	chloroplast Ananas comosus var. microstachys	Wed Jan 30 09:32:01 CET 2019	matK Extraction I	0	true	Bacterial	100.0%
		Ananas comosus var. parguazensis maturase K (matK) gene, partial cds; chloroplast	KU258042	0	1564	2	99.9%	99.9%	33.1%		1441.51	chloroplast Ananas comosus var. parguazensis	Wed Jan 30 09:32:01 CET 2019	matK Extraction I	0	true	Bacterial	100.0%
		Ananas nanus maturase K (matK) gene, complete cds; chloroplast	KU258041	0	1564	2	99.9%	99.9%	33.1%		1441.51	chloroplast Ananas comosus var. microstachys	Wed Jan 30 09:32:01 CET 2019	matK Extraction I	0	true	Bacterial	100.0%
		Ananas fritzmuelleri maturase K (matK) gene, complete cds; chloroplast	KU258040	0	1564	2	99.9%	99.9%	33.1%		1441.51	chloroplast Ananas comosus var. bracteatus	Wed Jan 30 09:32:01 CET 2019	matK Extraction I	0	true	Bacterial	100.0%
		Ananas comosus maturase K (matK) gene, complete cds; chloroplast	KU258039	0	1564	2	99.9%	99.9%	33.1%		1441.51	pineapple	Wed Jan 30 09:32:01 CET 2019	matK Extraction I	0	true	Bacterial	100.0%
		MegaBLAST results - only first 10 hits shown	GeneBank_ID	# Nucleotide Sequences With Mates	# Nucleotides	# Sequences	% Identical Sites	% Pairwise Identity	%GC	Accession	Bit-Score	Common Name	Created Date	Database	E Value	Free end gaps	Genetic Code	Grade
	JX649251_Catopsis floribunda	Catopsis floribunda isolate F10a tRNA-Lys (trnK) gene, partial sequence; and maturase K (matK) gene, complete cds; chloroplast	EU681898_Catopsis floribunda_32_Catopsis	0	1564	2	100.0%	100.0%	32.9%		1445.2	chloroplast Catopsis floribunda	Wed Jan 30 09:32:46 CET 2019	matK Extraction I	0	true	Bacterial	100.0%
		Catopsis morreniana MB-106 tRNA-Lys (trnK) gene, partial sequence; and maturase K (matK) gene, complete cds; chloroplast	AY614025_Catopsis morreniana_32_Catopsis	0	1564	2	100.0%	100.0%	32.9%		1445.2	chloroplast Catopsis morreniana	Wed Jan 30 09:32:46 CET 2019	matK Extraction I	0	true	Bacterial	100.0%
		Catopsis nitida isolate B463 trnK-UUU gene, partial sequence; and maturase K (matK) gene, complete cds; plastid	KX754166	0	1564	2	99.5%	99.5%	33.1%		1423.04	Tillandsia nitida Hook.	Wed Jan 30 09:32:47 CET 2019	matK Extraction I	0	true	Bacterial	99.7%
		Catopsis subulata MB-105 tRNA-Lys (trnK) gene, partial sequence; and maturase K (matK) gene, complete cds; chloroplast	AY614028	0	1564	2	99.5%	99.5%	32.9%		1423.04	chloroplast Catopsis subulata	Wed Jan 30 09:32:47 CET 2019	matK Extraction I	0	true	Bacterial	99.7%
		Catopsis paniculata isolate B507 trnK-UUU gene, partial sequence; and maturase K (matK) gene, complete cds; plastid	KX754171_Catopsis paniculata_32_Catopsis	0	1564	2	99.2%	99.2%	32.9%		1411.96	plastid Catopsis paniculata	Wed Jan 30 09:32:47 CET 2019	matK Extraction I	0	true	Bacterial	99.6%
		Catopsis nutans isolate B2 trnK-UUU gene, partial sequence; and maturase K (matK) gene, complete cds; plastid	KX754101_Catopsis nutans_32_Catopsis	0	1564	2	99.0%	99.0%	33.2%		1400.88	Tillandsia nutans Sw.	Wed Jan 30 09:32:47 CET 2019	matK Extraction I	0	true	Bacterial	99.5%
		Catopsis nutans var. nutans MB-2 tRNA-Lys (trnK) gene, partial sequence; and maturase K (matK) gene, complete cds; chloroplast	AY614026_Catopsis nutans_32_Catopsis	0	1564	2	99.0%	99.0%	33.2%		1400.88	chloroplast Catopsis nutans var. nutans	Wed Jan 30 09:32:47 CET 2019	matK Extraction I	0	true	Bacterial	99.5%
		Aechmea racinae maturase K (matK) gene, partial cds; chloroplast	JF295089_Aechmea racinae_15_Lymania_Aechmea_subgen_Lamprococcus_group	0	1564	2	98.5%	98.5%	33.0%		1378.72	chloroplast Aechmea racinae	Wed Jan 30 09:32:47 CET 2019	matK Extraction I	0	true	Bacterial	99.2%
		Tillandsia heteromorpha isolate B224 trnK-UUU gene, partial sequence; and maturase K (matK) gene, complete cds; plastid	KX754131	0	1564	2	98.3%	98.3%	32.5%		1373.18	plastid Tillandsia heteromorpha	Wed Jan 30 09:32:47 CET 2019	matK Extraction I	0	true	Bacterial	99.2%
		Aechmea fosteriana voucher NYBG 661/64B (Living specimen) trnK gene, partial sequence; and maturase K (matK) gene, complete cds; chloroplast	KU762888_Aechmea fosteriana_13_Cucullatanthus_group	0	1564	2	98.3%	98.3%	33.0%		1373.18	chloroplast Aechmea fosteriana	Wed Jan 30 09:32:47 CET 2019	matK Extraction I	0	true	Bacterial	99.2%
		MegaBLAST results - only first 10 hits shown	GeneBank_ID	# Nucleotide Sequences With Mates	# Nucleotides	# Sequences	% Identical Sites	% Pairwise Identity	%GC	Accession	Bit-Score	Common Name	Created Date	Database	E Value	Free end gaps	Genetic Code	Grade
	KU762762 - Aechmea incompta	Aechmea andersoniana voucher Monteiro 489 (RB) trnK gene, partial sequence; and maturase K (matK) gene, complete cds; chloroplast	KU762874	0	1564	2	100.0%	100.0%	32.9%		1445.2	chloroplast Aechmea andersoniana	Wed Jan 30 09:10:25 CET 2019	matK Extraction I	0	true	Bacterial	100.0%
		Aechmea incompta voucher Leme 2937 (SEL) trnK gene, partial sequence; and maturase K (matK) gene, complete cds; chloroplast	KU762865	0	1564	2	100.0%	100.0%	32.9%		1445.2	chloroplast Aechmea incompta	Wed Jan 30 09:10:25 CET 2019	matK Extraction I	0	true	Bacterial	100.0%
		Aechmea patentissima voucher Leme 7531 (Living specimen) trnK gene, partial sequence; and maturase K (matK) gene, complete cds; chloroplast	KU762765	0	1564	2	100.0%	100.0%	32.9%		1445.2	chloroplast Aechmea patentissima	Wed Jan 30 09:10:25 CET 2019	matK Extraction I	0	true	Bacterial	100.0%
		Aechmea incompta voucher Leme 904-TYPE (HB) trnK gene, partial sequence; and maturase K (matK) gene, complete cds; chloroplast	KU762763	0	1564	2	100.0%	100.0%	32.9%		1445.2	chloroplast Aechmea incompta	Wed Jan 30 09:10:25 CET 2019	matK Extraction I	0	true	Bacterial	100.0%
		Aechmea tentaculifera voucher Monteiro 463 (RB) trnK gene, partial sequence; and maturase K (matK) gene, complete cds; chloroplast	KU762761	0	1564	2	100.0%	100.0%	32.9%		1445.2	chloroplast Aechmea tentaculifera	Wed Jan 30 09:10:25 CET 2019	matK Extraction I	0	true	Bacterial	100.0%
		Aechmea ituberaensis voucher Luther s.n. (SEL) trnK gene, partial sequence; and maturase K (matK) gene, complete cds; chloroplast	KU762760	0	1564	2	100.0%	100.0%	32.9%		1445.2	chloroplast Aechmea ituberaensis	Wed Jan 30 09:10:25 CET 2019	matK Extraction I	0	true	Bacterial	100.0%
		Aechmea froesii voucher Aguirre-Santoro 711 (SEL) trnK gene, partial sequence; and maturase K (matK) gene, complete cds; chloroplast	KU762758	0	1564	2	100.0%	100.0%	32.9%		1445.2	chloroplast Aechmea froesii	Wed Jan 30 09:10:25 CET 2019	matK Extraction I	0	true	Bacterial	100.0%
		Aechmea andersoniana voucher Aguirre-Santoro 703 (RMH) trnK gene, partial sequence; and maturase K (matK) gene, complete cds; chloroplast	KU762756	0	1564	2	100.0%	100.0%	32.9%		1445.2	chloroplast Aechmea andersoniana	Wed Jan 30 09:10:25 CET 2019	matK Extraction I	0	true	Bacterial	100.0%
		Aechmea lingulata maturase K (matK) gene, partial cds; chloroplast	JN202224	0	1564	2	100.0%	100.0%	32.9%		1445.2	chloroplast Aechmea lingulata	Wed Jan 30 09:10:25 CET 2019	matK Extraction I	0	true	Bacterial	100.0%
		Aechmea sulbahianensis voucher Monteiro 470 (RB) trnK gene, partial sequence; and maturase K (matK) gene, complete cds; chloroplast	KU762774	0	1564	2	99.9%	99.9%	33.0%		1439.66	chloroplast Aechmea sulbahianensis	Wed Jan 30 09:10:25 CET 2019	matK Extraction I	0	true	Bacterial	99.9%
		MegaBLAST results - only first 10 hits shown	GeneBank_ID	# Nucleotide Sequences With Mates	# Nucleotides	# Sequences	% Identical Sites	% Pairwise Identity	%GC	Accession	Bit-Score	Common Name	Created Date	Database	E Value	Free end gaps	Genetic Code	Grade
	KU762764 - Aechmea patentissima	Aechmea andersoniana voucher Monteiro 489 (RB) trnK gene, partial sequence; and maturase K (matK) gene, complete cds; chloroplast	KU762874	0	1564	2	100.0%	100.0%	32.9%		1445.2	chloroplast Aechmea andersoniana	Wed Jan 30 09:12:32 CET 2019	matK Extraction I	0	true	Bacterial	100.0%
		Aechmea incompta voucher Leme 2937 (SEL) trnK gene, partial sequence; and maturase K (matK) gene, complete cds; chloroplast	KU762865	0	1564	2	100.0%	100.0%	32.9%		1445.2	chloroplast Aechmea incompta	Wed Jan 30 09:12:32 CET 2019	matK Extraction I	0	true	Bacterial	100.0%
		Aechmea patentissima voucher Leme 7531 (Living specimen) trnK gene, partial sequence; and maturase K (matK) gene, complete cds; chloroplast	KU762765	0	1564	2	100.0%	100.0%	32.9%		1445.2	chloroplast Aechmea patentissima	Wed Jan 30 09:12:32 CET 2019	matK Extraction I	0	true	Bacterial	100.0%
		Aechmea incompta voucher Leme 904-TYPE (HB) trnK gene, partial sequence; and maturase K (matK) gene, complete cds; chloroplast	KU762763	0	1564	2	100.0%	100.0%	32.9%		1445.2	chloroplast Aechmea incompta	Wed Jan 30 09:12:32 CET 2019	matK Extraction I	0	true	Bacterial	100.0%
		Aechmea tentaculifera voucher Monteiro 463 (RB) trnK gene, partial sequence; and maturase K (matK) gene, complete cds; chloroplast	KU762761	0	1564	2	100.0%	100.0%	32.9%		1445.2	chloroplast Aechmea tentaculifera	Wed Jan 30 09:12:31 CET 2019	matK Extraction I	0	true	Bacterial	100.0%
		Aechmea ituberaensis voucher Luther s.n. (SEL) trnK gene, partial sequence; and maturase K (matK) gene, complete cds; chloroplast	KU762760	0	1564	2	100.0%	100.0%	32.9%		1445.2	chloroplast Aechmea ituberaensis	Wed Jan 30 09:12:32 CET 2019	matK Extraction I	0	true	Bacterial	100.0%
		Aechmea froesii voucher Aguirre-Santoro 711 (SEL) trnK gene, partial sequence; and maturase K (matK) gene, complete cds; chloroplast	KU762758	0	1564	2	100.0%	100.0%	32.9%		1445.2	chloroplast Aechmea froesii	Wed Jan 30 09:12:32 CET 2019	matK Extraction I	0	true	Bacterial	100.0%
		Aechmea andersoniana voucher Aguirre-Santoro 703 (RMH) trnK gene, partial sequence; and maturase K (matK) gene, complete cds; chloroplast	KU762756	0	1564	2	100.0%	100.0%	32.9%		1445.2	chloroplast Aechmea andersoniana	Wed Jan 30 09:12:32 CET 2019	matK Extraction I	0	true	Bacterial	100.0%
		Aechmea lingulata maturase K (matK) gene, partial cds; chloroplast	JN202224	0	1564	2	100.0%	100.0%	32.9%		1445.2	chloroplast Aechmea lingulata	Wed Jan 30 09:12:32 CET 2019	matK Extraction I	0	true	Bacterial	100.0%
		Aechmea sulbahianensis voucher Monteiro 470 (RB) trnK gene, partial sequence; and maturase K (matK) gene, complete cds; chloroplast	KU762774	0	1564	2	99.9%	99.9%	33.0%		1439.66	chloroplast Aechmea sulbahianensis	Wed Jan 30 09:12:32 CET 2019	matK Extraction I	0	true	Bacterial	99.9%
		MegaBLAST results - only first 10 hits shown	GeneBank_ID	# Nucleotide Sequences With Mates	# Nucleotides	# Sequences	% Identical Sites	% Pairwise Identity	%GC	Accession	Bit-Score	Common Name	Created Date	Database	E Value	Free end gaps	Genetic Code	Grade
	KU762798_Aechmea chantinii	Aechmea penduliflora voucher MSBG 1995-0431A (Living specimen) trnK gene, partial sequence; and maturase K (matK) gene, complete cds; chloroplast	KU762800	0	1564	2	100.0%	100.0%	33.2%		1445.2	chloroplast Aechmea penduliflora	Wed Jan 30 09:08:26 CET 2019	matK Extraction I	0	true	Bacterial	100.0%
		Aechmea chantinii isolate K4 tRNA-Lys (trnK) gene, partial sequence; and maturase K (matK) gene, complete cds; chloroplast	AY950042_Aechmea chantinii_8_Princ_Amazonina_Aechmea_group_	0	1564	2	100.0%	100.0%	33.2%		1445.2	chloroplast Aechmea chantinii	Wed Jan 30 09:08:26 CET 2019	matK Extraction I	0	true	Bacterial	100.0%
		Aechmea lueddemanniana voucher MSBG 1997-0147A (Living specimen) trnK gene, partial sequence; and maturase K (matK) gene, complete cds; chloroplast	KU762879_Aechmea lueddemanniana _24_Central_American_group	0	1564	2	99.9%	99.9%	33.1%		1439.66	chloroplast Aechmea lueddemanniana	Wed Jan 30 09:08:27 CET 2019	matK Extraction I	0	true	Bacterial	99.9%
		Ananas nanus voucher MSBG 1197-1 foster (Living specimen) trnK gene, partial sequence; and maturase K (matK) gene, complete cds; chloroplast	KU762815	0	1564	2	99.9%	99.9%	33.1%		1439.66	chloroplast Ananas comosus var. microstachys	Wed Jan 30 09:08:26 CET 2019	matK Extraction I	0	true	Bacterial	99.9%
		Ananas comosus voucher Holst 6244 (SEL) trnK gene, partial sequence; and maturase K (matK) gene, complete cds; chloroplast	KU762814	0	1564	2	99.9%	99.9%	33.1%		1439.66	pineapple	Wed Jan 30 09:08:27 CET 2019	matK Extraction I	0	true	Bacterial	99.9%
		Aechmea roeseliae voucher MSBG 1995-0444A (Living specimen) trnK gene, partial sequence; and maturase K (matK) gene, complete cds; chloroplast	KU762810_Aechmea roeseliae_8_Princ_Amazonina_Aechmea_group	0	1564	2	99.9%	99.9%	33.4%		1439.66	chloroplast Aechmea roeseliae	Wed Jan 30 09:08:27 CET 2019	matK Extraction I	0	true	Bacterial	99.9%
		Lymania corallina voucher MSBG 1996-0662A (Living specimen) trnK gene, partial sequence; and maturase K (matK) gene, complete cds; chloroplast	KU762801	0	1564	2	99.9%	99.9%	33.1%		1439.66	chloroplast Lymania corallina	Wed Jan 30 09:08:26 CET 2019	matK Extraction I	0	true	Bacterial	99.9%
		Ananas ananassoides maturase K (matK) gene, complete cds; chloroplast	KU659085	0	1564	2	99.9%	99.9%	33.1%		1439.66	chloroplast Ananas comosus var. microstachys	Wed Jan 30 09:08:26 CET 2019	matK Extraction I	0	true	Bacterial	99.9%
		Ananas ananassoides maturase K (matK) gene, complete cds; chloroplast	KU659084	0	1564	2	99.9%	99.9%	33.1%		1439.66	chloroplast Ananas comosus var. microstachys	Wed Jan 30 09:08:26 CET 2019	matK Extraction I	0	true	Bacterial	99.9%
		Ananas comosus var. parguazensis maturase K (matK) gene, partial cds; chloroplast	KU258042	0	1564	2	99.9%	99.9%	33.1%		1439.66	chloroplast Ananas comosus var. parguazensis	Wed Jan 30 09:08:26 CET 2019	matK Extraction I	0	true	Bacterial	99.9%
		MegaBLAST results - only first 10 hits shown	#	# Nucleotide Sequences With Mates	# Nucleotides	# Sequences	% Identical Sites	% Pairwise Identity	%GC	Accession	Bit-Score	Common Name	Created Date	Database	E Value	Free end gaps	Genetic Code	Grade
	KU762864 - Aechmea andersoniana	Aechmea andersoniana voucher Monteiro 489 (RB) trnK gene, partial sequence; and maturase K (matK) gene, complete cds; chloroplast	KU762874	0	1564	2	100.0%	100.0%	32.9%		1445.2	chloroplast Aechmea andersoniana	Wed Jan 30 09:07:00 CET 2019	matK Extraction I	0	true	Bacterial	100.0%
		Aechmea incompta voucher Leme 2937 (SEL) trnK gene, partial sequence; and maturase K (matK) gene, complete cds; chloroplast	KU762865	0	1564	2	100.0%	100.0%	32.9%		1445.2	chloroplast Aechmea incompta	Wed Jan 30 09:07:00 CET 2019	matK Extraction I	0	true	Bacterial	100.0%
		Aechmea patentissima voucher Leme 7531 (Living specimen) trnK gene, partial sequence; and maturase K (matK) gene, complete cds; chloroplast	KU762765	0	1564	2	100.0%	100.0%	32.9%		1445.2	chloroplast Aechmea patentissima	Wed Jan 30 09:07:00 CET 2019	matK Extraction I	0	true	Bacterial	100.0%
		Aechmea incompta voucher Leme 904-TYPE (HB) trnK gene, partial sequence; and maturase K (matK) gene, complete cds; chloroplast	KU762763	0	1564	2	100.0%	100.0%	32.9%		1445.2	chloroplast Aechmea incompta	Wed Jan 30 09:07:00 CET 2019	matK Extraction I	0	true	Bacterial	100.0%
		Aechmea tentaculifera voucher Monteiro 463 (RB) trnK gene, partial sequence; and maturase K (matK) gene, complete cds; chloroplast	KU762761	0	1564	2	100.0%	100.0%	32.9%		1445.2	chloroplast Aechmea tentaculifera	Wed Jan 30 09:07:00 CET 2019	matK Extraction I	0	true	Bacterial	100.0%
		Aechmea ituberaensis voucher Luther s.n. (SEL) trnK gene, partial sequence; and maturase K (matK) gene, complete cds; chloroplast	KU762760	0	1564	2	100.0%	100.0%	32.9%		1445.2	chloroplast Aechmea ituberaensis	Wed Jan 30 09:07:00 CET 2019	matK Extraction I	0	true	Bacterial	100.0%
		Aechmea froesii voucher Aguirre-Santoro 711 (SEL) trnK gene, partial sequence; and maturase K (matK) gene, complete cds; chloroplast	KU762758	0	1564	2	100.0%	100.0%	32.9%		1445.2	chloroplast Aechmea froesii	Wed Jan 30 09:07:00 CET 2019	matK Extraction I	0	true	Bacterial	100.0%
		Aechmea andersoniana voucher Aguirre-Santoro 703 (RMH) trnK gene, partial sequence; and maturase K (matK) gene, complete cds; chloroplast	KU762756	0	1564	2	100.0%	100.0%	32.9%		1445.2	chloroplast Aechmea andersoniana	Wed Jan 30 09:07:00 CET 2019	matK Extraction I	0	true	Bacterial	100.0%
		Aechmea lingulata maturase K (matK) gene, partial cds; chloroplast	JN202224	0	1564	2	100.0%	100.0%	32.9%		1445.2	chloroplast Aechmea lingulata	Wed Jan 30 09:07:00 CET 2019	matK Extraction I	0	true	Bacterial	100.0%
		Aechmea sulbahianensis voucher Monteiro 470 (RB) trnK gene, partial sequence; and maturase K (matK) gene, complete cds; chloroplast	KU762774	0	1564	2	99.9%	99.9%	33.0%		1439.66	chloroplast Aechmea sulbahianensis	Wed Jan 30 09:07:00 CET 2019	matK Extraction I	0	true	Bacterial	99.9%
		MegaBLAST results - only first 10 hits shown	GeneBank_ID	# Nucleotide Sequences With Mates	# Nucleotides	# Sequences	% Identical Sites	% Pairwise Identity	%GC	Accession	Bit-Score	Common Name	Created Date	Database	E Value	Free end gaps	Genetic Code	Grade
	KU848380 - Tillandsia albida	Tillandsia albida voucher Flores s.n. tRNA-Lys (trnK) gene, intron; and maturase K (matK) gene, complete cds; chloroplast	KY114807	0	1564	2	100.0%	100.0%	31.6%		1445.2	chloroplast Tillandsia albida	Wed Jan 30 09:43:27 CET 2019	matK Extraction I	0	true	Bacterial	100.0%
		Tillandsia fresnilloensis isolate JP018 trnK gene, intron; and maturase K (matK) gene, partial cds; chloroplast	KU848381	0	1564	2	100.0%	100.0%	31.6%		1445.2	chloroplast Tillandsia fresnilloensis	Wed Jan 30 09:43:27 CET 2019	matK Extraction I	0	true	Bacterial	100.0%
		Tillandsia utriculata subsp. pringlei isolate B0734 trnK gene, intron; and maturase K (matK) gene, partial cds; chloroplast	KU848379_Tillandsia utriculata_12_Tillandsia_subg_Tillandsia	0	1564	2	100.0%	100.0%	31.6%		1445.2	chloroplast Tillandsia utriculata subsp. pringlei	Wed Jan 30 09:43:27 CET 2019	matK Extraction I	0	true	Bacterial	100.0%
		Tillandsia makoyana isolate JP008 trnK gene, intron; and maturase K (matK) gene, partial cds; chloroplast	KU848397	0	1564	2	99.7%	99.7%	31.8%		1434.12	chloroplast Tillandsia makoyana	Wed Jan 30 09:43:27 CET 2019	matK Extraction I	0	true	Bacterial	99.9%
		Tillandsia utriculata subsp. pringlei isolate B0736 trnK gene, intron; and maturase K (matK) gene, partial cds; chloroplast	KU848378_Tillandsia utriculata_12_Tillandsia_subg_Tillandsia	0	1564	2	99.7%	99.7%	31.6%		1434.12	chloroplast Tillandsia utriculata subsp. pringlei	Wed Jan 30 09:43:27 CET 2019	matK Extraction I	0	true	Bacterial	99.9%
		Tillandsia utriculata subsp. pringlei isolate B0735 trnK gene, intron; and maturase K (matK) gene, partial cds; chloroplast	KU848377_Tillandsia utriculata_12_Tillandsia_subg_Tillandsia	0	1564	2	99.7%	99.7%	31.6%		1434.12	chloroplast Tillandsia utriculata subsp. pringlei	Wed Jan 30 09:43:27 CET 2019	matK Extraction I	0	true	Bacterial	99.9%
		Tillandsia utriculata subsp. pringlei isolate JP0733 trnK gene, intron; and maturase K (matK) gene, partial cds; chloroplast	KU848376_Tillandsia utriculata_12_Tillandsia_subg_Tillandsia	0	1564	2	99.7%	99.7%	31.6%		1434.12	chloroplast Tillandsia utriculata subsp. pringlei	Wed Jan 30 09:43:27 CET 2019	matK Extraction I	0	true	Bacterial	99.9%
		Tillandsia utriculata isolate JP006 trnK gene, intron; and maturase K (matK) gene, partial cds; chloroplast	KU848370_Tillandsia utriculata_12_Tillandsia_subg_Tillandsia	0	1564	2	99.7%	99.7%	31.6%		1434.12	chloroplast Tillandsia utriculata	Wed Jan 30 09:43:27 CET 2019	matK Extraction I	0	true	Bacterial	99.9%
		Tillandsia calcicola isolate JP105 trnK gene, intron; and maturase K (matK) gene, partial cds; chloroplast	KU848367	0	1564	2	99.7%	99.7%	31.6%		1434.12	chloroplast Tillandsia calcicola	Wed Jan 30 09:43:27 CET 2019	matK Extraction I	0	true	Bacterial	99.9%
		Tillandsia utriculata f. utriculata MB-27 tRNA-Lys (trnK) gene, partial sequence; and maturase K (matK) gene, complete cds; chloroplast	AY614091_Tillandsia utriculata_12_Tillandsia_subg_Tillandsia	0	1564	2	99.7%	99.7%	31.6%		1434.12	chloroplast Tillandsia utriculata f. utriculata	Wed Jan 30 09:43:27 CET 2019	matK Extraction I	0	true	Bacterial	99.9%
		MegaBLAST results - only first 10 hits shown	GeneBank_ID	# Nucleotide Sequences With Mates	# Nucleotides	# Sequences	% Identical Sites	% Pairwise Identity	%GC	Accession	Bit-Score	Common Name	Created Date	Database	E Value	Free end gaps	Genetic Code	Grade
	KX754212_Tillandsia lymanii	Tillandsia lymanii isolate B1236 trnK-UUU gene, partial sequence; and maturase K (matK) gene, complete cds; plastid	KX754213_Tillandsia lymanii_7_Tillandsia_rauhii_complex	0	1564	2	100.0%	100.0%	32.6%		1445.2	plastid Tillandsia lymanii	Wed Jan 30 10:41:39 CET 2019	matK Extraction I	0	true	Bacterial	100.0%
		Tillandsia teres isolate B201 trnK-UUU gene, partial sequence; and maturase K (matK) gene, complete cds; plastid	KX754124_Tillandsia teres_7_Tillandsia_rauhii_complex	0	1564	2	100.0%	100.0%	32.6%		1445.2	plastid Tillandsia teres	Wed Jan 30 10:41:39 CET 2019	matK Extraction I	0	true	Bacterial	100.0%
		Tillandsia rauhii var. rauhii MB-92 tRNA-Lys (trnK) gene, partial sequence; and maturase K (matK) gene, complete cds; chloroplast	AY614101_Tillandsia rauhii_7_Tillandsia_rauhii_complex	0	1564	2	100.0%	100.0%	32.6%		1445.2	chloroplast Tillandsia rauhii var. rauhii	Wed Jan 30 10:41:39 CET 2019	matK Extraction I	0	true	Bacterial	100.0%
		Tillandsia denudata var. vivipara isolate B750 trnK-UUU gene, partial sequence; and maturase K (matK) gene, complete cds; plastid	KX754193	0	1564	2	99.9%	99.9%	32.7%		1439.66	plastid Tillandsia denudata var. vivipara	Wed Jan 30 10:41:39 CET 2019	matK Extraction I	0	true	Bacterial	99.9%
		Tillandsia floribunda isolate B351 trnK-UUU gene, partial sequence; and maturase K (matK) gene, complete cds; plastid	KX754151_Tillandsia floribunda_6_Tillandsia_biflorai_complex	0	1564	2	99.9%	99.9%	32.5%		1439.66	plastid Tillandsia floribunda	Wed Jan 30 10:41:39 CET 2019	matK Extraction I	0	true	Bacterial	99.9%
		Tillandsia heteromorpha isolate B224 trnK-UUU gene, partial sequence; and maturase K (matK) gene, complete cds; plastid	KX754131	0	1564	2	99.9%	99.9%	32.5%		1439.66	plastid Tillandsia heteromorpha	Wed Jan 30 10:41:39 CET 2019	matK Extraction I	0	true	Bacterial	99.9%
		Tillandsia heterophylla isolate B47 trnK-UUU gene, partial sequence; and maturase K (matK) gene, complete cds; plastid	KX754104	0	1564	2	99.9%	99.9%	32.5%		1439.66	plastid Tillandsia heterophylla	Wed Jan 30 10:41:39 CET 2019	matK Extraction I	0	true	Bacterial	99.9%
		Tillandsia fendleri var. fendleri MB-9 tRNA-Lys (trnK) gene, partial sequence; and maturase K (matK) gene, complete cds; chloroplast	AY614116	0	1564	2	99.9%	99.9%	32.5%		1439.66	chloroplast Tillandsia fendleri var. fendleri	Wed Jan 30 10:41:39 CET 2019	matK Extraction I	0	true	Bacterial	99.9%
		Tillandsia multicaulis MB-107 tRNA-Lys (trnK) gene, partial sequence; and maturase K (matK) gene, complete cds; chloroplast	AY614112	0	1564	2	99.9%	99.9%	32.5%		1439.66	chloroplast Tillandsia multicaulis	Wed Jan 30 10:41:39 CET 2019	matK Extraction I	0	true	Bacterial	99.9%
		Tillandsia hildae isolate B763 trnK-UUU gene, partial sequence; and maturase K (matK) gene, complete cds; plastid	KX754198	0	1564	2	99.7%	99.7%	32.4%		1434.12	plastid Tillandsia hildae	Wed Jan 30 10:41:39 CET 2019	matK Extraction I	0	true	Bacterial	99.9%
		MegaBLAST results - only first 10 hits shown	GeneBank_ID	# Nucleotide Sequences With Mates	# Nucleotides	# Sequences	% Identical Sites	% Pairwise Identity	%GC	Accession	Bit-Score	Common Name	Created Date	Database	E Value	Free end gaps	Genetic Code	Grade
	JN202225_Aechmea nudicaulis	Aechmea nudicaulis voucher Aguirre-Santoro 719 (SEL) trnK gene, partial sequence; and maturase K (matK) gene, complete cds; chloroplast	KU762861_Aechmea nudicaulis_19_Aechmea_subgen_Ortgiesia_Quesnelia_A_nudicaulis_group	0	1564	2	100.0%	100.0%	32.7%		1445.2	chloroplast Aechmea nudicaulis	Wed Jan 30 09:11:37 CET 2019	matK Extraction I	0	true	Bacterial	100.0%
		Aechmea nudicaulis voucher Aguirre-Santoro 717 (SEL) trnK gene, partial sequence; and maturase K (matK) gene, complete cds; chloroplast	KU762860_Aechmea nudicaulis_19_Aechmea_subgen_Ortgiesia_Quesnelia_A_nudicaulis_group	0	1564	2	99.9%	99.9%	32.6%		1439.66	chloroplast Aechmea nudicaulis	Wed Jan 30 09:11:37 CET 2019	matK Extraction I	0	true	Bacterial	99.9%
		Aechmea distichantha maturase K (matK) gene, complete cds; chloroplast	KU258023	0	1564	2	99.9%	99.9%	32.9%		1439.66	chloroplast Aechmea distichantha	Wed Jan 30 09:11:37 CET 2019	matK Extraction I	0	true	Bacterial	99.9%
		Aechmea nudicaulis maturase K (matK) gene, partial cds; chloroplast	JN202226_Aechmea nudicaulis_19_Aechmea_subgen_Ortgiesia_Quesnelia_A_nudicaulis_group	0	1564	2	99.9%	99.9%	32.9%		1439.66	chloroplast Aechmea nudicaulis	Wed Jan 30 09:11:37 CET 2019	matK Extraction I	0	true	Bacterial	99.9%
		Aechmea distichantha maturase K (matK) gene, partial cds; chloroplast	JN202220	0	1564	2	99.9%	99.9%	32.9%		1439.66	chloroplast Aechmea distichantha	Wed Jan 30 09:11:37 CET 2019	matK Extraction I	0	true	Bacterial	99.9%
		Quesnelia arvensis isolate KEW 23821 tRNA-Lys (trnK) gene, partial sequence; and maturase K (matK) gene, complete cds; chloroplast	EU780850	0	1564	2	99.9%	99.9%	32.6%		1439.66	chloroplast Quesnelia arvensis	Wed Jan 30 09:11:37 CET 2019	matK Extraction I	0	true	Bacterial	99.9%
		Aechmea nudicaulis var. nudicaulis MB-118 tRNA-Lys (trnK) gene, partial sequence; and maturase K (matK) gene, complete cds; chloroplast	AY614024_Aechmea nudicaulis_19_Aechmea_subgen_Ortgiesia_Quesnelia_A_nudicaulis_group	0	1564	2	99.9%	99.9%	32.6%		1439.66	chloroplast Aechmea nudicaulis var. nudicaulis	Wed Jan 30 09:11:37 CET 2019	matK Extraction I	0	true	Bacterial	99.9%
AMBIGUOUS		Aechmea nudicaulis maturase K (matK) gene, complete cds; chloroplast	KU258031_Aechmea nudicaulis_19_Aechmea_subgen_Ortgiesia_Quesnelia_A_nudicaulis_group	0	1564	2	99.7%	99.7%	32.6%		1434.12	chloroplast Aechmea nudicaulis	Wed Jan 30 09:11:38 CET 2019	matK Extraction I	0	true	Bacterial	99.9%
		Quesnelia kautskyi maturase K (matK) gene, partial cds; chloroplast	JN202270_Quesnelia kautskyi_18_Billbergia_Quesnelia_subgen_Billbergiopsis_Aechmea_subgen_Aechmea_group	0	1564	2	99.7%	99.7%	33.0%		1434.12	chloroplast Quesnelia kautskyi	Wed Jan 30 09:11:38 CET 2019	matK Extraction I	0	true	Bacterial	99.9%
		Quesnelia kautskyi maturase K (matK) gene, partial cds; chloroplast	JN202269_Quesnelia kautskyi_18_Billbergia_Quesnelia_subgen_Billbergiopsis_Aechmea_subgen_Aechmea_group	0	1564	2	99.7%	99.7%	33.0%		1434.12	chloroplast Quesnelia kautskyi	Wed Jan 30 09:11:38 CET 2019	matK Extraction I	0	true	Bacterial	99.9%
		Billbergia euphemiae maturase K (matK) gene, partial cds; chloroplast	JN202237_Billbergia euphemiae_18_Billbergia_Quesnelia_subgen_Billbergiopsis_Aechmea_subgen_Aechmea_group	0	1564	2	99.7%	99.7%	33.0%		1434.12	chloroplast Billbergia euphemiae	Wed Jan 30 09:11:38 CET 2019	matK Extraction I	0	true	Bacterial	99.9%
		Aechmea phanerophlebia maturase K (matK) gene, partial cds; chloroplast	JN202229_Aechmea phanerophlebia_22_Quesnelia_subgen_Quesneliana_Aechmea_group	0	1564	2	99.7%	99.7%	33.0%		1434.12	chloroplast Aechmea phanerophlebia	Wed Jan 30 09:11:38 CET 2019	matK Extraction I	0	true	Bacterial	99.9%
		Aechmea phanerophlebia maturase K (matK) gene, partial cds; chloroplast	JN202227_Aechmea phanerophlebia_22_Quesnelia_subgen_Quesneliana_Aechmea_group	0	1564	2	99.7%	99.7%	33.0%		1434.12	chloroplast Aechmea phanerophlebia	Wed Jan 30 09:11:38 CET 2019	matK Extraction I	0	true	Bacterial	99.9%
		Aechmea distichantha maturase K (matK) gene, partial cds; chloroplast	JN202221	0	1564	2	99.7%	99.7%	33.0%		1434.12	chloroplast Aechmea distichantha	Wed Jan 30 09:11:38 CET 2019	matK Extraction I	0	true	Bacterial	99.9%
		Quesnelia liboniana isolate H220 tRNA-Lys (trnK) gene, partial sequence; and maturase K (matK) gene, complete cds; chloroplast	AY950048_Quesnelia liboniana_18_Billbergia_Quesnelia_subgen_Billbergiopsis_Aechmea_subgen_Aechmea_group	0	1564	2	99.7%	99.7%	33.0%		1434.12	chloroplast Quesnelia liboniana	Wed Jan 30 09:11:37 CET 2019	matK Extraction I	0	true	Bacterial	99.9%
		Aechmea distichantha var. glaziovii isolate H008 tRNA-Lys (trnK) gene, partial sequence; and maturase K (matK) gene, complete cds; chloroplast	AY950041	0	1564	2	99.7%	99.7%	33.0%		1434.12	chloroplast Aechmea distichantha var. glaziovii	Wed Jan 30 09:11:38 CET 2019	matK Extraction I	0	true	Bacterial	99.9%
		MegaBLAST results - only first 10 hits shown	GeneBank_ID	# Nucleotide Sequences With Mates	# Nucleotides	# Sequences	% Identical Sites	% Pairwise Identity	%GC	Accession	Bit-Score	Common Name	Created Date	Database	E Value	Free end gaps	Genetic Code	Grade
	KU848368_Tillandsia utriculata	Tillandsia utriculata isolate B807 trnK-UUU gene, partial sequence; and maturase K (matK) gene, complete cds; plastid	KX754201_Tillandsia utriculata_12_Tillandsia_subg_Tillandsia	0	1564	2	100.0%	100.0%	31.7%		1445.2	plastid Tillandsia utriculata	Wed Jan 30 10:44:06 CET 2019	matK Extraction I	0	true	Bacterial	100.0%
		Tillandsia utriculata subsp. pringlei isolate B0736 trnK gene, intron; and maturase K (matK) gene, partial cds; chloroplast	KU848378_Tillandsia utriculata_12_Tillandsia_subg_Tillandsia	0	1564	2	99.9%	99.9%	31.6%		1439.66	chloroplast Tillandsia utriculata subsp. pringlei	Wed Jan 30 10:44:06 CET 2019	matK Extraction I	0	true	Bacterial	99.9%
		Tillandsia utriculata subsp. pringlei isolate B0735 trnK gene, intron; and maturase K (matK) gene, partial cds; chloroplast	KU848377_Tillandsia utriculata_12_Tillandsia_subg_Tillandsia	0	1564	2	99.9%	99.9%	31.6%		1439.66	chloroplast Tillandsia utriculata subsp. pringlei	Wed Jan 30 10:44:06 CET 2019	matK Extraction I	0	true	Bacterial	99.9%
		Tillandsia utriculata subsp. pringlei isolate JP0733 trnK gene, intron; and maturase K (matK) gene, partial cds; chloroplast	KU848376_Tillandsia utriculata_12_Tillandsia_subg_Tillandsia	0	1564	2	99.9%	99.9%	31.6%		1439.66	chloroplast Tillandsia utriculata subsp. pringlei	Wed Jan 30 10:44:06 CET 2019	matK Extraction I	0	true	Bacterial	99.9%
		Tillandsia utriculata isolate JP006 trnK gene, intron; and maturase K (matK) gene, partial cds; chloroplast	KU848370_Tillandsia utriculata_12_Tillandsia_subg_Tillandsia	0	1564	2	99.9%	99.9%	31.6%		1439.66	chloroplast Tillandsia utriculata	Wed Jan 30 10:44:06 CET 2019	matK Extraction I	0	true	Bacterial	99.9%
		Tillandsia calcicola isolate JP105 trnK gene, intron; and maturase K (matK) gene, partial cds; chloroplast	KU848367	0	1564	2	99.9%	99.9%	31.6%		1439.66	chloroplast Tillandsia calcicola	Wed Jan 30 10:44:06 CET 2019	matK Extraction I	0	true	Bacterial	99.9%
		Tillandsia utriculata f. utriculata MB-27 tRNA-Lys (trnK) gene, partial sequence; and maturase K (matK) gene, complete cds; chloroplast	AY614091_Tillandsia utriculata_12_Tillandsia_subg_Tillandsia	0	1564	2	99.9%	99.9%	31.6%		1439.66	chloroplast Tillandsia utriculata f. utriculata	Wed Jan 30 10:44:06 CET 2019	matK Extraction I	0	true	Bacterial	99.9%
		Tillandsia utriculata voucher Torres R. 17935 tRNA-Lys (trnK) gene, intron; and maturase K (matK) gene, complete cds; chloroplast	KY114859_Tillandsia utriculata_12_Tillandsia_subg_Tillandsia	0	1564	2	99.7%	99.7%	31.6%		1434.12	chloroplast Tillandsia utriculata	Wed Jan 30 10:44:06 CET 2019	matK Extraction I	0	true	Bacterial	99.9%
		Tillandsia utriculata subsp. pringlei isolate JP004 trnK gene, intron; and maturase K (matK) gene, partial cds; chloroplast	KU848375_Tillandsia utriculata_12_Tillandsia_subg_Tillandsia	0	1564	2	99.7%	99.7%	31.6%		1434.12	chloroplast Tillandsia utriculata subsp. pringlei	Wed Jan 30 10:44:06 CET 2019	matK Extraction I	0	true	Bacterial	99.9%
		Tillandsia utriculata isolate B0100 trnK gene, intron; and maturase K (matK) gene, partial cds; chloroplast	KU848369_Tillandsia utriculata_12_Tillandsia_subg_Tillandsia	0	1564	2	99.7%	99.7%	31.5%		1434.12	chloroplast Tillandsia utriculata	Wed Jan 30 10:44:06 CET 2019	matK Extraction I	0	true	Bacterial	99.9%
		Tillandsia utriculata f. utriculata MB-100 tRNA-Lys (trnK) gene, partial sequence; and maturase K (matK) gene, complete cds; chloroplast	AY614090_Tillandsia utriculata_12_Tillandsia_subg_Tillandsia	0	1564	2	99.7%	99.7%	31.5%		1434.12	chloroplast Tillandsia utriculata f. utriculata	Wed Jan 30 10:44:06 CET 2019	matK Extraction I	0	true	Bacterial	99.9%
		Tillandsia albida voucher Flores s.n. tRNA-Lys (trnK) gene, intron; and maturase K (matK) gene, complete cds; chloroplast	KY114807	0	1564	2	99.6%	99.6%	31.6%		1428.58	chloroplast Tillandsia albida	Wed Jan 30 10:44:06 CET 2019	matK Extraction I	0	true	Bacterial	99.8%
		Tillandsia makoyana isolate JP008 trnK gene, intron; and maturase K (matK) gene, partial cds; chloroplast	KU848397	0	1564	2	99.6%	99.6%	31.8%		1428.58	chloroplast Tillandsia makoyana	Wed Jan 30 10:44:06 CET 2019	matK Extraction I	0	true	Bacterial	99.8%
		Tillandsia fresnilloensis isolate JP018 trnK gene, intron; and maturase K (matK) gene, partial cds; chloroplast	KU848381	0	1564	2	99.6%	99.6%	31.6%		1428.58	chloroplast Tillandsia fresnilloensis	Wed Jan 30 10:44:06 CET 2019	matK Extraction I	0	true	Bacterial	99.8%
		Tillandsia utriculata subsp. pringlei isolate B0734 trnK gene, intron; and maturase K (matK) gene, partial cds; chloroplast	KU848379_Tillandsia utriculata_12_Tillandsia_subg_Tillandsia	0	1564	2	99.6%	99.6%	31.6%		1428.58	chloroplast Tillandsia utriculata subsp. pringlei	Wed Jan 30 10:44:06 CET 2019	matK Extraction I	0	true	Bacterial	99.8%
		Tillandsia utriculata isolate JP060 trnK gene, intron; and maturase K (matK) gene, partial cds; chloroplast	KU848372_Tillandsia utriculata_12_Tillandsia_subg_Tillandsia	0	1564	2	99.6%	99.6%	31.3%		1428.58	chloroplast Tillandsia utriculata	Wed Jan 30 10:44:06 CET 2019	matK Extraction I	0	true	Bacterial	99.8%
		Tillandsia utriculata isolate B0747 trnK gene, intron; and maturase K (matK) gene, partial cds; chloroplast	KU848371_Tillandsia utriculata_12_Tillandsia_subg_Tillandsia	0	1564	2	99.6%	99.6%	31.3%		1428.58	chloroplast Tillandsia utriculata	Wed Jan 30 10:44:06 CET 2019	matK Extraction I	0	true	Bacterial	99.8%
